# Supplementary material for: The LIN28B–IMP1 post-transcriptional regulon has opposing effects on oncogenic signaling in the intestine
Source: PubMed Central journal article supplement — Genes Dev. 2018 Aug 1;32(15-16):1020–34. doi: 10.1101/gad.314369.118 (PMC6075153; doi:10.1101/gad.314369.118), 2018-08-01
Supplement: supp_32.15-16.1020_Supplemental_Table_S1.pdf [file supp_32.15-16.1020_Supplemental_Table_S1.pdf]

Supplementary Table 1 : Pathways enriched in SW480 cells with LIN28B overexpression and IMP1 deletion

| NAME                                     | NES        | NOM p-val   | FDR q-val   | FWER p-val |
|------------------------------------------|------------|-------------|-------------|------------|
| HALLMARK_E2F_TARGETS                     | -2.454074  | 0           | 0           | 0          |
| HALLMARK_G2M_CHECKPOINT                  | -2.2141345 | 0           | 0           | 0          |
| HALLMARK_MYC_TARGETS_V1                  | -2.0498626 | 0           | 0           | 0          |
| HALLMARK_OXIDATIVE_PHOSPHORYLATION       | -1.7566986 | 0           | 0.002211519 | 0.007      |
| HALLMARK_NOTCH_SIGNALING                 | -1.6862454 | 0.002053388 | 0.002624215 | 0.01       |
| HALLMARK_FATTY_ACID_METABOLISM           | -1.5941863 | 0           | 0.008481816 | 0.038      |
| HALLMARK_WNT_BETA_CATENIN_SIGNALING      | -1.5165645 | 0.01705757  | 0.0167675   | 0.085      |
| HALLMARK_MYC_TARGETS_V2                  | -1.456847  | 0.015625    | 0.026727388 | 0.149      |
| HALLMARK_UV_RESPONSE_UP                  | -1.4103328 | 0           | 0.0386601   | 0.23       |
| HALLMARK_DNA_REPAIR                      | -1.3855485 | 0.012987013 | 0.044314306 | 0.283      |
| HALLMARK_SPERMATOGENESIS                 | -1.3849131 | 0.006593407 | 0.040523335 | 0.285      |
| HALLMARK_PEROXISOME                      | -1.3344721 | 0.027253669 | 0.061803464 | 0.429      |
| HALLMARK_MTORC1_SIGNALING                | -1.3153853 | 0.013888889 | 0.06772548  | 0.495      |
| HALLMARK_ADIPOGENESIS                    | -1.3133562 | 0.008602151 | 0.06409443  | 0.503      |
| HALLMARK_CHOLESTEROL_HOMEOSTASIS         | -1.3059405 | 0.055900622 | 0.064840354 | 0.533      |
| HALLMARK_MITOTIC_SPINDLE                 | -1.2059352 | 0.04954955  | 0.16254866  | 0.865      |
| HALLMARK_ESTROGEN_RESPONSE_LATE          | -1.1966153 | 0.0771028   | 0.16710739  | 0.883      |
| HALLMARK_HEDGEHOG_SIGNALING              | -1.1826227 | 0.17038539  | 0.17756905  | 0.916      |
| HALLMARK_GLYCOLYSIS                      | -1.1664828 | 0.08        | 0.19207256  | 0.94       |
| HALLMARK_ANGIOGENESIS                    | -1.1518369 | 0.21111111  | 0.20649734  | 0.958      |
| HALLMARK_BILE_ACID_METABOLISM            | -1.1412742 | 0.18518518  | 0.21454285  | 0.967      |
| HALLMARK_ANDROGEN_RESPONSE               | -1.120606  | 0.20177384  | 0.2415668   | 0.986      |
| HALLMARK_HYPOXIA                         | -1.068403  | 0.2488372   | 0.3487353   | 0.999      |
| HALLMARK_PI3K_AKT_MTOR_SIGNALING         | -1.040257  | 0.3325792   | 0.40959582  | 0.999      |
| HALLMARK_PANCREAS_BETA_CELLS             | -1.0032067 | 0.40169132  | 0.5057253   | 1          |
| HALLMARK_KRAS_SIGNALING_DN               | -0.9755197 | 0.518847    | 0.5805789   | 1          |
| HALLMARK_XENOBIOTIC_METABOLISM           | -0.9621439 | 0.5788337   | 0.6075719   | 1          |
| HALLMARK_REACTIVE_OXYGEN_SPECIES_PATHWAY | -0.9223176 | 0.5813449   | 0.72866654  | 1          |
| HALLMARK_IL2_STAT5_SIGNALING             | -0.9090229 | 0.8098434   | 0.75037533  | 1          |

|                         |           |            |           |   |
|-------------------------|-----------|------------|-----------|---|
| HALLMARK_APICAL_SURFACE | -0.823883 | 0.81991524 | 0.9356491 | 1 |
|-------------------------|-----------|------------|-----------|---|
