# Supplementary material for: The LIN28B–IMP1 post-transcriptional regulon has opposing effects on oncogenic signaling in the intestine
Source: PubMed Central journal article supplement — Genes Dev. 2018 Aug 1;32(15-16):1020–34. doi: 10.1101/gad.314369.118 (PMC6075153; doi:10.1101/gad.314369.118), 2018-08-01
Supplement: supp_32.15-16.1020_Supplemental_Table_S2.pdf [file supp_32.15-16.1020_Supplemental_Table_S2.pdf]

Supplemental Table 2: Comparison of fold change of transcripts between the eCLIP studies(Conway et al., 2016) and our TE studies.

| <b>Translational efficiency changes</b> | <b>eCLIP dataset</b> |                   |                   |
|-----------------------------------------|----------------------|-------------------|-------------------|
|                                         | < 2 fold change      | > 2 fold increase | > 2 fold decrease |
| < 2 fold change                         | 2492                 | 4019              | 111               |
| > 2 fold increase                       | 90                   | 235               | 5                 |
| > 2 fold decrease                       | 153                  | 428               | 12                |
