# Supplementary material for: The LIN28B–IMP1 post-transcriptional regulon has opposing effects on oncogenic signaling in the intestine
Source: PubMed Central journal article supplement — Genes Dev. 2018 Aug 1;32(15-16):1020–34. doi: 10.1101/gad.314369.118 (PMC6075153; doi:10.1101/gad.314369.118), 2018-08-01
Supplement: supp_32.15-16.1020_Supplemental_Table_S3.pdf [file supp_32.15-16.1020_Supplemental_Table_S3.pdf]

Supplemental Table 3

|                                |              |                                                                                                                     |
|--------------------------------|--------------|---------------------------------------------------------------------------------------------------------------------|
| mCD44 (F)<br>mCD44 (R)         | Mus CD44     | (F): TTC ATC CCA ACG CTA TCT GTG<br>(R): CGA AGG AAT TGG GTA GGT CTG                                                |
| mAxin2 (F)<br>mAxin2 (R)       | Mus Axin2    | (F): TAG GTT CCG GCT ATG TCT TTG<br>(R): TGT TTC TTA CTC CCC ATG CG                                                 |
| mCyclinD1 (F)<br>mCyclinD1 (R) | Mus CyclinD1 | (F): TGC CAT CCA TGC GGA AA<br>(R): AGC GGG AAG AAC TCC TCT TC<br><br>(R): TGT TTC TTA CTC CCC ATG CG               |
| mMycn (F)<br>mMycn (R)         | Mus nMyc     | (F): GTC TGT TCC AGC TAC TGC C<br>(R): TCC TCT TCA TCT TCC TCC TCG                                                  |
| mIgf2bp2 (F)<br>mIgf2bp2 (R)   | Mus mIgf2bp2 | (F): TCT CGG GTA AAG TGG AAT TGC<br>(R): TGT CCC ATA TTC AGC CAA CAG                                                |
| mHmga2 (F)<br>mHmga2 (R)       | Mus Hmga2    | (F): CAA GAG GCA GAC CTA GGA AAT G<br>(R): GAT CCA ACT GAT GCT GAG GTA G                                            |
| mArid3a (F)<br>mArid3a (R)     | Mus Arid3a   | (F): CCA GTC ATA TGG CAT CCC AG<br>(R): GTC CGC ATC CAG TTC ATA GAG                                                 |
| mWnt3 (F)<br>mWnt3 (F)         | Mus Wnt3     | (F): AGC TGC CAA GAG TGT ATT CG<br>(R): CTA GAT CCT GCT TCT CAT GGG                                                 |
| mLrig1 (F)<br>mLrig1 (R)       | Mus Lrig1    | (F): GAA CAC CTG AAC CTT GGA G<br>(R): CTG CAG CAT CCT ACC CAT TAG                                                  |
| mSox9 (F)<br>mSox9 (R)         | Mus Sox9     | (F): CAA GAC TCT GGG CAA GCT C<br>(R): GGG CTG GTA CTT GTA ATC GG                                                   |
| mBmi1 (F)<br>mBmi1 (R)         | Mus Bmi1     | (F): CTG GAG AAG AAA TGG CCC ACT A<br>(R): CTC ATC TTC ATT CTT TTG CAA GTT G                                        |
| mProm1 (F)<br>mProm1 (R)       | Mus Prom1    | (F): GAA AAG TTG GTC TGC GAA CC<br>(R): TCT CAA GCT GAA AAG CAG CA                                                  |
| mHopx (F)<br>mHopx (R)         | Mus Hopx     | (F): CGG AGG ACC AGG TGG AGA T<br>(R): CCG GGT GCT TGT TGA CCT T                                                    |
| mAscl2 (F)<br>mAscl2 (R)       | Mus Ascl2    | (F): GGC TGC TCT GAG CCT ACC T<br>(R): TAG GTC CAC CAG GAG TCA CC                                                   |
| mLgr5 (F)<br>mLgr5 (R)         | Mus Lgr5     | (F): CAG TGT GGA CGA CCT TCA TAA GAA<br>(R): AAG GTC CCG CTC ATC TTG AAC                                            |
| mOlfm4 (F)<br>mOlfm4 (R)       | Mus Olfm4    | (F): TGG CCC TTG GAA GCT GTA GT<br>(R): ACC TCC TTG GCC ATA GCG AA                                                  |
| mGapdh (F)<br>mGapdh (R)       | Mus Gapdh    | (F): GGG TGT GAA CCA CGA GAA ATA<br>(R): AGT GAT GGC ATG GAC TGT G                                                  |
| mIgf2bp1<br>Taqman             | Mus Igf2bp1  | Forw: GAGCAGGAGATGGTACAAGTG<br>Probe : /56-FAM/<br>TGGCGAAGC/ZEN/GGGAGAGTTGT/3IABkFQ/<br>Rev: TGGCGAAGCGGGAGAGTTGT  |
| mTbp<br>Taqman                 | Mus Tbp      | Forw: CACCAATGACTCCTATGACCC<br>Probe:<br>/5HEX/CACTCCTGC/ZEN/CACACCAGCTTCT/3IABkFQ/<br>Rev: CAAGTTTACAGCCAAGATTCACG |
| mRps6<br>Taqman                | Mus Rps6     | <a href="#">Mm02342455_g1</a>                                                                                       |

Supplemental Table 3

|                                          |                  |                                                                           |
|------------------------------------------|------------------|---------------------------------------------------------------------------|
| <i>hAXIN2</i> (F)<br><i>hAXIN2</i> (R)   | Hu <i>AXIN2</i>  | (F): TCC ATA CCG GAG GAT GCT GA<br>(R): TTC ATA CAT CGG GAG CAC CG        |
| <i>hCD44</i> (F)<br><i>hCD44</i> (R)     | Hu <i>CD44</i>   | (F): TAA GGA CAC CCC AAA TTC CA<br>(R): CTG CAA TGC AAA CTG CAA G         |
| <i>hLEF-1</i> (F)<br><i>hLEF-1</i> (R)   | Hu <i>LEF-1</i>  | (F): CCC GTG AAG AGC AGG CTA AA<br>(R): TCT TGG ACC TGT ACC TGA TGC       |
| <i>hSOX9</i> (F)<br><i>hSOX9</i> (R)     | Hu <i>SOX9</i>   | (F): ACC CGC ACT TGC ACA ACG<br>(R): CCG TTC TTC ACC GAC TTC CTC C        |
| <i>hTCF-4</i> (F)<br><i>hTCF-4</i> (R)   | Hu <i>TCF-4</i>  | (F): ACT ACA GGG GCA GAG TGT CT<br>(R): TGT CAG GTC CTC ATC GTC AT        |
| <i>hLIN28B</i> (F)<br><i>hLIN28B</i> (R) | Hu <i>LIN28B</i> | (F): CAT CTC CAT GAT AAA CCG AGA GG<br>(R): GTT ACC CGT ATT GAC TCA AGG C |
| <i>hIMP1</i> (F)<br><i>hIMP1</i> (R)     | Hu <i>IMP1</i>   | (F): GAC CCC TGA TGA GAA CGA C<br>(R): TGG TTA CTC TGT CCC TCC TGA        |
| <i>hGAPDH</i> (F)<br><i>hGAPDH</i> (R)   | Hu <i>GAPDH</i>  | (F): TCA AGA AGG TGG TGA AGC AG<br>(R): AAA GGT GGA GGA GTG GGT GT        |
