# Supplementary material for: The LIN28B–IMP1 post-transcriptional regulon has opposing effects on oncogenic signaling in the intestine
Source: PubMed Central journal article supplement — Genes Dev. 2018 Aug 1;32(15-16):1020–34. doi: 10.1101/gad.314369.118 (PMC6075153; doi:10.1101/gad.314369.118), 2018-08-01
Supplement: supp_32.15-16.1020_Supplemental_Table_S4.pdf [file supp_32.15-16.1020_Supplemental_Table_S4.pdf]

Supplemental Table 4

|                |                                                                    |                                                                                                              |                                                                        |
|----------------|--------------------------------------------------------------------|--------------------------------------------------------------------------------------------------------------|------------------------------------------------------------------------|
| General Cre    | Cre-Neu-LP (F)<br>Cre-Neu-UP (F)<br>Gabra1 LP (R)<br>Gabra1 UP (R) | CAGGGTGTTATAAGCAATCCC<br>CCTGGAAAATGCTTCTGTCCG<br>CAATGGTAGGCTCACTCTGGGAGATGATA<br>AACACACACTGGAGGACTGGCTAGG | Cre positive<br>band: 450bp;<br>WT internal<br>control band: 300<br>bp |
| Villin-Cre     | MVP +5498 (F)<br>Cre R1 (R)                                        | AGG CAC TAA GGG AGC CAA TG<br>TGC GAA CCT CAT CAC TCG TTG C                                                  | 350 bp                                                                 |
| Vil-lin28b-MID | MVP +5498 (F)<br>mLin28bEX1 (R)                                    | AGG CAC TAA GGG AGC CAA TG<br>GTG GCT CTT CAC CTT TGC TT                                                     | 410 bp                                                                 |
| Imp-1 Floxed   | Imp1-floxed (F)<br>Imp1-floxed (R)                                 | TGT GTG TGT GTG AGG GAG GT<br>TAG GTG ACG TTG ACC ACA GC                                                     | Wild Type: 205<br>Floxed: 325                                          |
| HopxERT-Cre    | HopX (F)<br>HopX (R)                                               | CGA GGG GAT CAG ATG AAG AA<br>CCA AAA GAC GGC AAT ATG GT                                                     | 713 bp                                                                 |
| Imp1-OE        |                                                                    |                                                                                                              |                                                                        |
