# Supplementary material for: The LIN28B–IMP1 post-transcriptional regulon has opposing effects on oncogenic signaling in the intestine
Source: PubMed Central journal article supplement — Genes Dev. 2018 Aug 1;32(15-16):1020–34. doi: 10.1101/gad.314369.118 (PMC6075153; doi:10.1101/gad.314369.118), 2018-08-01
Supplement: supp_32.15-16.1020_Supplemental_Table_S5.pdf [file supp_32.15-16.1020_Supplemental_Table_S5.pdf]

Supplemental Table 5

| Sample ID                 | PCR Primer  | Barcode | 3' Linker sequence                              |
|---------------------------|-------------|---------|-------------------------------------------------|
| WT FP                     | NEB Index 3 | TAGAC   | /5Phos/NNNNNTAGACAGATCGGAAGAGCACACGTCTGAA/3ddC/ |
| LIN28B OE FP              |             | TCTAG   | /5Phos/NNNNNTCTAGAGATCGGAAGAGCACACGTCTGAA/3ddC/ |
| WT IMP1 -/- FP            |             | ACTGA   | /5Phos/NNNNNACTGAAGATCGGAAGAGCACACGTCTGAA/3ddC/ |
| LIN28B OE IMP1 -/- FP     |             | CAGTA   | /5Phos/NNNNNCAGTAAGATCGGAAGAGCACACGTCTGAA/3ddC/ |
| WT RNAseq                 |             | GTACT   | /5Phos/NNNNNGTACTAGATCGGAAGAGCACACGTCTGAA/3ddC/ |
| LIN28B OE RNAseq          |             | TGCAT   | /5Phos/NNNNNTGCATAGATCGGAAGAGCACACGTCTGAA/3ddC/ |
| WT IMP1 -/- RNAseq        |             | CGTAA   | /5Phos/NNNNNAGCTAAGATCGGAAGAGCACACGTCTGAA/3ddC/ |
| LIN28B OE IMP1 -/- RNAseq |             | GATCA   | /5Phos/NNNNNGATCAAGATCGGAAGAGCACACGTCTGAA/3ddC/ |

5' Linker sequence – rGrUrUrCrArGrArGrUrUrCrUrArCrArGrUrCrCrGrArCrGrArUrC>NNNN
