# Supplementary material for: The LIN28B–IMP1 post-transcriptional regulon has opposing effects on oncogenic signaling in the intestine
Source: PubMed Central journal article supplement — Genes Dev. 2018 Aug 1;32(15-16):1020–34. doi: 10.1101/gad.314369.118 (PMC6075153; doi:10.1101/gad.314369.118), 2018-08-01
Supplement: supp_32.15-16.1020_Supplemental_Table_S6.pdf [file supp_32.15-16.1020_Supplemental_Table_S6.pdf]

Supplemental Table 6 : GSEA analysis of genes differentially expressed genes in VillinCre;Imp1fl/fl mice intestinal crypts as compared to controls

| NAME                                                                  | NES        | NOM p-val | FDR q-val | FWER p-val |
|-----------------------------------------------------------------------|------------|-----------|-----------|------------|
| GO_RIBOSOMAL_SUBUNIT                                                  | -3.154938  | 0         | 0.00E+00  | 0          |
| GO_RIBOSOME                                                           | -3.0670123 | 0         | 0.00E+00  | 0          |
| GO_CYTOSOLIC_RIBOSOME                                                 | -2.9051516 | 0         | 0.00E+00  | 0          |
| GO_MITOCHONDRIAL_TRANSLATION                                          | -2.892131  | 0         | 0.00E+00  | 0          |
| GO_TRANSLATIONAL_TERMINATION                                          | -2.888401  | 0         | 0.00E+00  | 0          |
| GO_TRANSLATIONAL_INITIATION                                           | -2.8423738 | 0         | 0.00E+00  | 0          |
| GO_ORGANELLAR_RIBOSOME                                                | -2.784141  | 0         | 0.00E+00  | 0          |
| ZHANG_TLX_TARGETS_60HR_DN                                             | -3.2253294 | 0         | 0.00E+00  | 0          |
| ZHANG_TLX_TARGETS_DN                                                  | -3.1786401 | 0         | 0.00E+00  | 0          |
| ZHANG_TLX_TARGETS_36HR_DN                                             | -3.1668155 | 0         | 0.00E+00  | 0          |
| HALLMARK_E2F_TARGETS                                                  | -3.1554654 | 0         | 0.00E+00  | 0          |
| GO_LARGE_RIBOSOMAL_SUBUNIT                                            | -2.7557027 | 0         | 0.00E+00  | 0          |
| HALLMARK_MYC_TARGETS_V1                                               | -3.0919576 | 0         | 0.00E+00  | 0          |
| GO_SMALL_RIBOSOMAL_SUBUNIT                                            | -2.7095683 | 0         | 0.00E+00  | 0          |
| SOTIRIOU_BREAST_CANCER_GRADE_1_VS_3_UP                                | -3.0447555 | 0         | 0.00E+00  | 0          |
| FEVR_CTNNB1_TARGETS_DN                                                | -2.9432278 | 0         | 0.00E+00  | 0          |
| WONG_EMBRYONIC_STEM_CELL_CORE                                         | -2.9341679 | 0         | 0.00E+00  | 0          |
| ROSTY_CERVICAL_CANCER_PROLIFERATION_CLUSTER                           | -2.9078352 | 0         | 0.00E+00  | 0          |
| REACTOME_3_UTR_MEDIATED_TRANSLATIONAL_REGULATION                      | -2.9058435 | 0         | 0.00E+00  | 0          |
| GO_SISTER_CHROMATID_COHESION                                          | -2.6864874 | 0         | 0.00E+00  | 0          |
| PUJANA_CHEK2_PCC_NETWORK                                              | -2.8975575 | 0         | 0.00E+00  | 0          |
| GO_RIBOSOME_BIOGENESIS                                                | -2.6746385 | 0         | 0.00E+00  | 0          |
| REACTOME_TRANSLATION                                                  | -2.8910217 | 0         | 0.00E+00  | 0          |
| GO_NUCLEAR_TRANSCRIBED_MRNA_CATABOLIC_PROCESS_NONSENSE_MEDIATED_DECAY | -2.6285388 | 0         | 0.00E+00  | 0          |
| KEGG_RIBOSOME                                                         | -2.8790286 | 0         | 0.00E+00  | 0          |
| REACTOME_PEPTIDE_CHAIN_ELONGATION                                     | -2.8541281 | 0         | 0.00E+00  | 0          |
| GO_CONDENSED_CHROMOSOME                                               | -2.5778222 | 0         | 0.00E+00  | 0          |

|                                                                        |            |   |          |   |
|------------------------------------------------------------------------|------------|---|----------|---|
| REACTOME_INFLUENZA_VIRAL_RNA_TRANSCRIPTION_AND_REPLICATION             | -2.8348467 | 0 | 0.00E+00 | 0 |
| KAMMINGA_EZH2_TARGETS                                                  | -2.8097804 | 0 | 0.00E+00 | 0 |
| REACTOME_SRP_DEPENDENT_COTRANSLATIONAL_PROTEIN_TARGETING_TO_MEMBRANE   | -2.7875233 | 0 | 0.00E+00 | 0 |
| GO_RIBONUCLEOPROTEIN_COMPLEX_BIOGENESIS                                | -2.5516093 | 0 | 0.00E+00 | 0 |
| GO_CYTOSOLIC_LARGE_RIBOSOMAL_SUBUNIT                                   | -2.5474973 | 0 | 0.00E+00 | 0 |
| REACTOME_NONSENSE_MEDIATED_DECAY_ENHANCED_BY_THE_EXON_JUNCTION_COMPLEX | -2.743423  | 0 | 0.00E+00 | 0 |
| LEE_EARLY_T_LYMPHOCYTE_UP                                              | -2.736412  | 0 | 0.00E+00 | 0 |
| ISHIDA_E2F_TARGETS                                                     | -2.7350755 | 0 | 0.00E+00 | 0 |
| KAUFFMANN_MELANOMA_RELAPSE_UP                                          | -2.7326438 | 0 | 0.00E+00 | 0 |
| PUJANA_XPRSS_INT_NETWORK                                               | -2.7210326 | 0 | 0.00E+00 | 0 |
| PUJANA_BRCA_CENTERED_NETWORK                                           | -2.7155685 | 0 | 0.00E+00 | 0 |
| GO_DNA_RECOMBINATION                                                   | -2.544963  | 0 | 0.00E+00 | 0 |
| BENPORATH_PROLIFERATION                                                | -2.7082338 | 0 | 0.00E+00 | 0 |
| CROONQUIST_IL6_DEPRIVATION_DN                                          | -2.7042186 | 0 | 0.00E+00 | 0 |
| WHITEFORD_PEDIATRIC_CANCER_MARKERS                                     | -2.6872954 | 0 | 0.00E+00 | 0 |
| GO_ESTABLISHMENT_OF_PROTEIN_LOCALIZATION_TO_ENDOPLASMIC_RETICULUM      | -2.5012343 | 0 | 0.00E+00 | 0 |
| ZHOU_CELL_CYCLE_GENES_IN_IR_RESPONSE_6HR                               | -2.6799917 | 0 | 0.00E+00 | 0 |
| GO_RECOMBINATIONAL_REPAIR                                              | -2.4871025 | 0 | 0.00E+00 | 0 |
| WINNEPENINCKX_MELANOMA_METASTASIS_UP                                   | -2.6388457 | 0 | 0.00E+00 | 0 |
| GO_CONDENSED_CHROMOSOME_CENTROMERIC_REGION                             | -2.449905  | 0 | 0.00E+00 | 0 |
| MISSIAGLIA_REGULATED_BY_METHYLATION_DN                                 | -2.6203012 | 0 | 0.00E+00 | 0 |
| ZHOU_CELL_CYCLE_GENES_IN_IR_RESPONSE_24HR                              | -2.6132808 | 0 | 0.00E+00 | 0 |
| FARMER_BREAST_CANCER_CLUSTER_2                                         | -2.6011872 | 0 | 0.00E+00 | 0 |
| CROONQUIST_NRAS_SIGNALING_DN                                           | -2.5994081 | 0 | 0.00E+00 | 0 |
| REACTOME_INFLUENZA_LIFE_CYCLE                                          | -2.5720546 | 0 | 0.00E+00 | 0 |

|                                                                                    |            |   |          |       |
|------------------------------------------------------------------------------------|------------|---|----------|-------|
| ZHANG_BREAST_CANCER_PROG<br>ENITORS UP                                             | -2.5698965 | 0 | 0.00E+00 | 0     |
| PUJANA_BREAST_CANCER_WITH<br>BRCA1_MUTATED UP                                      | -2.5567155 | 0 | 0.00E+00 | 0     |
| HALLMARK_G2M_CHECKPOINT                                                            | -2.5393524 | 0 | 0.00E+00 | 0     |
| BILANGES_SERUM_AND_RAPAMY<br>CIN_SENSITIVE_GENES                                   | -2.5199327 | 0 | 0.00E+00 | 0     |
| ZHAN_MULTIPLE_MYELOMA_PR_<br>UP                                                    | -2.5195396 | 0 | 0.00E+00 | 0     |
| HOFFMANN_LARGE_TO_SMALL_P<br>RE_BII_LYMPHOCYTE UP                                  | -2.4886186 | 0 | 0.00E+00 | 0     |
| KANG_DOXORUBICIN_RESISTANC<br>E UP                                                 | -2.4658346 | 0 | 0.00E+00 | 0     |
| CHANG_CYCLING_GENES                                                                | -2.455247  | 0 | 0.00E+00 | 0     |
| MORI_LARGE_PRE_BII_LYMPHOC<br>YTE UP                                               | -2.4369445 | 0 | 1.48E-05 | 0.001 |
| GO_RECIPROCAL_DNA_RECOMBI<br>NATION                                                | -2.4213686 | 0 | 2.81E-05 | 0.002 |
| REACTOME_FORMATION_OF_THE<br>_TERNARY_COMPLEX_AND_SUBS<br>EQUENTLY_THE_43S_COMPLEX | -2.423429  | 0 | 2.85E-05 | 0.002 |
| GO_MITOCHONDRIAL_RNA_META<br>BOLIC_PROCESS                                         | -2.4249806 | 0 | 2.88E-05 | 0.002 |
| GO_RRNA_METABOLIC_PROCESS                                                          | -2.426538  | 0 | 2.92E-05 | 0.002 |
| MORI_IMMATURE_B_LYMPHOCYT<br>E DN                                                  | -2.4026685 | 0 | 7.07E-05 | 0.005 |
| GOBERT_OLIGODENDROCYTE_DI<br>FFERENTIATION UP                                      | -2.4044044 | 0 | 7.15E-05 | 0.005 |
| LI_WILMS_TUMOR_ANAPLASTIC_<br>UP                                                   | -2.3812122 | 0 | 1.07E-04 | 0.008 |
| GO_TRANSLATIONAL_ELONGATIO<br>N                                                    | -2.3865504 | 0 | 1.09E-04 | 0.008 |
| GO_NCRNA_PROCESSING                                                                | -2.386837  | 0 | 1.10E-04 | 0.008 |
| GO_INNER_MITOCHONDRIAL_ME<br>MBRANE_PROTEIN_COMPLEX                                | -2.388242  | 0 | 1.11E-04 | 0.008 |
| GREENBAUM_E2A_TARGETS_UP                                                           | -2.3894558 | 0 | 1.12E-04 | 0.008 |
| GO_CENTROMERE_COMPLEX_AS<br>SEMBLY                                                 | -2.3770785 | 0 | 1.18E-04 | 0.009 |
| GRAHAM_NORMAL QUIESCENT_<br>VS_NORMAL_DIVIDING DN                                  | -2.378077  | 0 | 1.20E-04 | 0.009 |
| GARY_CD5_TARGETS_DN                                                                | -2.3567214 | 0 | 1.40E-04 | 0.011 |
| GO_RECIPROCAL_MEIOTIC_RECO<br>MBINATION                                            | -2.3567653 | 0 | 1.41E-04 | 0.011 |
| REACTOME_MITOTIC_PROMETAP<br>HASE                                                  | -2.359001  | 0 | 1.43E-04 | 0.011 |

|                                                                                                                 |            |   |          |       |
|-----------------------------------------------------------------------------------------------------------------|------------|---|----------|-------|
| REACTOME_DNA_REPLICATION                                                                                        | -2.3521676 | 0 | 1.73E-04 | 0.014 |
| REACTOME_MEIOTIC_RECOMBINATION                                                                                  | -2.3529928 | 0 | 1.75E-04 | 0.014 |
| SCHLOSSER_MYC_TARGETS_REPRESSED_BY_SERUM                                                                        | -2.346571  | 0 | 1.80E-04 | 0.015 |
| REACTOME_PROCESSING_OF_CAPPED_INTRON_CONTAINING_PREMRNA                                                         | -2.3472748 | 0 | 1.82E-04 | 0.015 |
| GO_CYTOSOLIC_SMALL_RIBOSOMAL_SUBUNIT                                                                            | -2.3491597 | 0 | 1.84E-04 | 0.015 |
| EGUCHI_CELL_CYCLE_RB1_TARGETS                                                                                   | -2.3393679 | 0 | 2.00E-04 | 0.017 |
| ODONNELL_TARGETS_OF_MYC_AND_TFRCDN                                                                              | -2.3411274 | 0 | 2.02E-04 | 0.017 |
| REN_BOUND_BY_E2F                                                                                                | -2.3274734 | 0 | 2.18E-04 | 0.019 |
| CAIRO_HEPATOBLASTOMA_CLASSES_UP                                                                                 | -2.328137  | 0 | 2.20E-04 | 0.019 |
| RODRIGUES_THYROID_CARCINOMA_POORLY_DIFFERENTIATED_UP                                                            | -2.3287632 | 0 | 2.22E-04 | 0.019 |
| REACTOME_ACTIVATION_OF_THE_MRNA_UPON_BINDING_OF_THE_CAP_BINDING_COMPLEX_AND_EIFSF_AND_SUBSEQUENT_BINDING_TO_43S | -2.322896  | 0 | 2.27E-04 | 0.02  |
| FERREIRA_EWINGS_SARCOMA_UNSTABLE_VS_STABLE_UP                                                                   | -2.3099387 | 0 | 2.34E-04 | 0.021 |
| GO_NUCLEAR_CHROMOSOME_SEGREGATION                                                                               | -2.313504  | 0 | 2.36E-04 | 0.021 |
| GO_DNA_REPLICATION_INDEPENDENT_NUCLEOSOME_ASSEMBLY                                                              | -2.2997105 | 0 | 2.65E-04 | 0.024 |
| GO_KINETOCHORE                                                                                                  | -2.2935853 | 0 | 2.82E-04 | 0.026 |
| RHODES_CANCER_META_SIGNATURE                                                                                    | -2.293903  | 0 | 2.85E-04 | 0.026 |
| GO_MULTI_ORGANISM_METABOLIC_PROCESS                                                                             | -2.2902653 | 0 | 2.90E-04 | 0.027 |
| BIDUS_METASTASIS_UP                                                                                             | -2.2818964 | 0 | 3.19E-04 | 0.03  |
| GO_RIBOSOMAL_SMALL_SUBUNIT_BIOGENESIS                                                                           | -2.2762191 | 0 | 3.35E-04 | 0.032 |
| REACTOME_MITOTIC_MM_G1_PHASES                                                                                   | -2.2772303 | 0 | 3.38E-04 | 0.032 |
| BURTON_ADIPOGENESIS_3                                                                                           | -2.2715037 | 0 | 3.53E-04 | 0.034 |
| SONG_TARGETS_OF_IE86_CMV_PROTEIN                                                                                | -2.270831  | 0 | 3.91E-04 | 0.038 |

|                                                                                                                           |            |   |          |       |
|---------------------------------------------------------------------------------------------------------------------------|------------|---|----------|-------|
| REACTOME_RESPIRATORY_ELECTRON_TRANSPORT_ATP_SYNTHESIS_BY_CHEMIOSMOTIC_COUPLING_AND_HEAT_PRODUCTION_BY_UNCOUPLING_PROTEINS | -2.2696426 | 0 | 3.98E-04 | 0.039 |
| KAUFFMANN_DNA_REPAIR_GENES                                                                                                | -2.2675486 | 0 | 4.15E-04 | 0.041 |
| KOBAYASHI_EGFR_SIGNALING_24HR_DN                                                                                          | -2.2656665 | 0 | 4.31E-04 | 0.043 |
| GO_ORGANELLAR_SMALL_RIBOSOMAL_SUBUNIT                                                                                     | -2.264162  | 0 | 4.37E-04 | 0.044 |
| GO_RIBOSOME_ASSEMBLY                                                                                                      | -2.2608027 | 0 | 4.53E-04 | 0.046 |
| WU_APOPTOSIS_BY_CDKN1A_VIA_TP53                                                                                           | -2.2542005 | 0 | 4.88E-04 | 0.05  |
| GO_CHROMOSOME_SEGREGATION                                                                                                 | -2.2461815 | 0 | 5.14E-04 | 0.053 |
| GO_ORGANELLAR_LARGE_RIBOSOMAL_SUBUNIT                                                                                     | -2.244062  | 0 | 5.19E-04 | 0.054 |
| KONG_E2F3_TARGETS                                                                                                         | -2.2380137 | 0 | 5.62E-04 | 0.059 |
| REACTOME_MRNA_SPLICING                                                                                                    | -2.2362843 | 0 | 5.67E-04 | 0.06  |
| REACTOME_RESPIRATORY_ELECTRON_TRANSPORT                                                                                   | -2.2312508 | 0 | 5.76E-04 | 0.062 |
| CHNG_MULTIPLE_MYELOMA_HYPERPLOID_UP                                                                                       | -2.232094  | 0 | 5.81E-04 | 0.062 |
| MANALO_HYPOXIA_DN                                                                                                         | -2.2257705 | 0 | 6.28E-04 | 0.068 |
| LY_AGING_OLD_DN                                                                                                           | -2.2255225 | 0 | 6.32E-04 | 0.069 |
| GO_DNA_REPLICATION_INDEPENDENT_NUCLEOSOME_ORGANIZATION                                                                    | -2.2237232 | 0 | 6.37E-04 | 0.07  |
| CHEN_ETV5_TARGETS_TESTIS                                                                                                  | -2.2208817 | 0 | 6.59E-04 | 0.073 |
| GO_MITOCHONDRIAL_MATRIX                                                                                                   | -2.2191396 | 0 | 6.63E-04 | 0.074 |
| GO_SISTER_CHROMATID_SEGREGATION                                                                                           | -2.2158525 | 0 | 7.03E-04 | 0.079 |
| GO_MITOTIC_RECOMBINATION                                                                                                  | -2.2089179 | 0 | 7.65E-04 | 0.088 |
| GO_CHROMOSOME_CENTROMERIC_REGION                                                                                          | -2.2111146 | 0 | 7.68E-04 | 0.087 |
| DUTERTRE ESTRADIOL_RESPONSE_24HR_UP                                                                                       | -2.2096872 | 0 | 7.71E-04 | 0.088 |
| GO_MITOCHONDRIAL_PROTEIN_COMPLEX                                                                                          | -2.204627  | 0 | 8.36E-04 | 0.096 |
| GO_TRNA_METABOLIC_PROCESS                                                                                                 | -2.1990793 | 0 | 8.57E-04 | 0.099 |
| RHODES_UNDIFFERENTIATED_CANCER                                                                                            | -2.1948526 | 0 | 8.94E-04 | 0.104 |
| GO_NCRNA_METABOLIC_PROCESSES                                                                                              | -2.191913  | 0 | 9.21E-04 | 0.107 |
| ABRAMSON_INTERACT_WITH_AIR                                                                                                | -2.1877239 | 0 | 9.31E-04 | 0.109 |

|                                                                          |            |   |          |       |
|--------------------------------------------------------------------------|------------|---|----------|-------|
| KEGG_DNA_REPLICATION                                                     | -2.1857688 | 0 | 9.35E-04 | 0.111 |
| MARSON_BOUND_BY_E2F4_UNSTIMULATED                                        | -2.1857908 | 0 | 9.42E-04 | 0.111 |
| GO_STRUCTURAL_CONSTITUENT_OF_RIBOSOME                                    | -2.180974  | 0 | 9.73E-04 | 0.118 |
| REACTOME_DEPOSITION_OF_NEW_CENPA_CONTAINING_NUCLOSOMES_AT_THE_CENTROMERE | -2.1819098 | 0 | 9.80E-04 | 0.118 |
| DANG_MYC_TARGETS_UP                                                      | -2.1824553 | 0 | 9.86E-04 | 0.118 |
| AMUNDSON_GAMMA_RADIATION_RESPONSE                                        | -2.1775804 | 0 | 1.03E-03 | 0.125 |
| FINETTI_BREAST_CANCER_KINOME_RED                                         | -2.1744251 | 0 | 1.04E-03 | 0.129 |
| PUJANA_BRCA2_PCC_NETWORK                                                 | -2.17473   | 0 | 1.05E-03 | 0.129 |
| MILI_PSEUDOPODIA_HAPTOTAXIS_UP                                           | -2.1755166 | 0 | 1.06E-03 | 0.129 |
| FUJII_YBX1_TARGETS_DN                                                    | -2.1702824 | 0 | 1.12E-03 | 0.138 |
| GO_GLYOXYLATE_METABOLIC_PROCESS                                          | -2.1656415 | 0 | 1.18E-03 | 0.144 |
| HORIUCHI_WTAP_TARGETS_DN                                                 | -2.1618683 | 0 | 1.19E-03 | 0.149 |
| REACTOME_METABOLISM_OF_RNA                                               | -2.161958  | 0 | 1.19E-03 | 0.149 |
| RHEIN_ALL_GLUCOCORTICOID_THERAPY_DN                                      | -2.1631062 | 0 | 1.19E-03 | 0.148 |
| REACTOME_CELL_CYCLE_MITOTIC                                              | -2.1636264 | 0 | 1.20E-03 | 0.148 |
| COLLER_MYC_TARGETS_UP                                                    | -2.1566684 | 0 | 1.22E-03 | 0.154 |
| SMID_BREAST_CANCER_LUMINAL_A_DN                                          | -2.1583538 | 0 | 1.22E-03 | 0.153 |
| GO_STRAND_DISPLACEMENT                                                   | -2.1520903 | 0 | 1.26E-03 | 0.159 |
| MARKEY_RB1_ACUTE_LOF_UP                                                  | -2.1405838 | 0 | 1.45E-03 | 0.18  |
| KEGG_HOMOLOGOUS_RECOMBINATION                                            | -2.139822  | 0 | 1.46E-03 | 0.183 |
| GO_DNA_DEPENDENT_DNA_REPLICATION                                         | -2.1400557 | 0 | 1.47E-03 | 0.183 |
| ZHONG_RESPONSE_TO_AZACITIDINE_AND_TSA_DN                                 | -2.1358795 | 0 | 1.57E-03 | 0.197 |
| GO_DNA_REPLICATION                                                       | -2.1321795 | 0 | 1.65E-03 | 0.207 |
| REACTOME_MRNA_PROCESSING                                                 | -2.1322634 | 0 | 1.66E-03 | 0.207 |
| REACTOME_G2_M_CHECKPOINTS                                                | -2.1294022 | 0 | 1.66E-03 | 0.209 |
| GO_SINGLE_STRANDED_DNA_BINDING                                           | -2.1298435 | 0 | 1.67E-03 | 0.209 |
| GO_PRERIBOSOME                                                           | -2.125224  | 0 | 1.70E-03 | 0.215 |
| REICHERT_MITOSIS_LIN9_TARGETS                                            | -2.121514  | 0 | 1.78E-03 | 0.226 |

|                                                        |            |   |          |       |
|--------------------------------------------------------|------------|---|----------|-------|
| GO_MITOCHONDRIAL_RESPIRATORY_CHAIN_COMPLEX_I_ASSEMBLY  | -2.1171653 | 0 | 1.88E-03 | 0.238 |
| GO_NUCLEOCYTOPLASMIC_TRANSPORTER_ACTIVITY              | -2.1165326 | 0 | 1.89E-03 | 0.24  |
| WAKASUGI_HAVE_ZNF143_BINDING_SITES                     | -2.112256  | 0 | 1.99E-03 | 0.254 |
| GO_SPLICEOSOMAL_COMPLEX_ASSEMBLY                       | -2.1092677 | 0 | 2.01E-03 | 0.259 |
| LI_WILMS_TUMOR_VS_FETAL_KIDNEY_1_DN                    | -2.1098447 | 0 | 2.02E-03 | 0.259 |
| REACTOME_METABOLISM_OF_NON_CODING_RNA                  | -2.1030977 | 0 | 2.08E-03 | 0.271 |
| GO_MATURATION_OF_SSU_RRNA                              | -2.1022663 | 0 | 2.09E-03 | 0.274 |
| GO_MITOCHONDRIAL_ELECTRON_TRANSPORT_NADH_TO_UBIQUINONE | -2.1048694 | 0 | 2.10E-03 | 0.27  |
| GO_REGULATION_OF_DNA_DEPENDENT_DNA_REPLICATION         | -2.1001253 | 0 | 2.13E-03 | 0.279 |
| GO_RNA_PROCESSING                                      | -2.0992224 | 0 | 2.14E-03 | 0.281 |
| GO_DNA_STRAND_ELONGATION                               | -2.097738  | 0 | 2.16E-03 | 0.285 |
| GO_MEIOSIS_I                                           | -2.0946403 | 0 | 2.30E-03 | 0.301 |
| MUELLER_PLURINET                                       | -2.0934398 | 0 | 2.33E-03 | 0.307 |
| GO_NUCLEOID                                            | -2.0918074 | 0 | 2.34E-03 | 0.313 |
| MOLENAAR_TARGETS_OF_CCND1_AND_CDK4_DN                  | -2.0920846 | 0 | 2.35E-03 | 0.313 |
| GO_INTRACILIARY_TRANSPORT_PARTICLE                     | -2.088878  | 0 | 2.41E-03 | 0.322 |
| GO_AMINO_ACID_ACTIVATION                               | -2.082886  | 0 | 2.57E-03 | 0.341 |
| REACTOME_TELOMERE_MAINTENANCE                          | -2.0737834 | 0 | 2.80E-03 | 0.362 |
| GO_RIBOSOMAL_LARGE_SUBUNIT_BIOGENESIS                  | -2.073336  | 0 | 2.81E-03 | 0.363 |
| FRASOR_RESPONSE_TO_SERM_OR_FULVESTRANT_DN              | -2.0703921 | 0 | 2.84E-03 | 0.372 |
| REACTOME_DOUBLE_STRAND_BREAK_REPAIR                    | -2.0705433 | 0 | 2.85E-03 | 0.372 |
| GO_TRNA_AMINOACYLATION                                 | -2.0693483 | 0 | 2.86E-03 | 0.377 |
| SHEDDEN_LUNG_CANCER_POOR_SURVIVAL_A6                   | -2.070544  | 0 | 2.86E-03 | 0.372 |
| GO_ENDODEOXYRIBONUCLEASE_ACTIVITY                      | -2.0709417 | 0 | 2.87E-03 | 0.371 |
| GO_RIBONUCLEOPROTEIN_COMPLEX_SUBUNIT_ORGANIZATION      | -2.0630367 | 0 | 3.13E-03 | 0.407 |
| GO_CHROMOSOMAL_REGION                                  | -2.062064  | 0 | 3.15E-03 | 0.41  |

|                                                                   |            |   |          |       |
|-------------------------------------------------------------------|------------|---|----------|-------|
| GO_NADH_DEHYDROGENASE_COMPLEX_ASSEMBLY                            | -2.061382  | 0 | 3.15E-03 | 0.412 |
| GO_DNA_DEPENDENT_ATPASE_ACTIVITY                                  | -2.0565486 | 0 | 3.34E-03 | 0.43  |
| GO_NON_RECOMBINATIONAL_REPAIR                                     | -2.052252  | 0 | 3.50E-03 | 0.444 |
| ODONNELL_TFRC_TARGETS_DN                                          | -2.0457988 | 0 | 3.75E-03 | 0.466 |
| GO_RIBOSOMAL_LARGE_SUBUNIT_ASSEMBLY                               | -2.0430572 | 0 | 3.76E-03 | 0.474 |
| GO_MITOCHONDRIAL_RESPIRATORY_CHAIN_COMPLEX_I_BIOGENESIS           | -2.0437298 | 0 | 3.76E-03 | 0.471 |
| GO_CELLULAR_PROTEIN_COMPLEX_DISASSEMBLY                           | -2.0441823 | 0 | 3.78E-03 | 0.471 |
| GO_MEIOTIC_CHROMOSOME_SEGREGATION                                 | -2.0399902 | 0 | 3.83E-03 | 0.486 |
| GO_SOMATIC_CELL_DNA_RECOMBINATION                                 | -2.0400481 | 0 | 3.85E-03 | 0.486 |
| REACTOME_CELL_CYCLE                                               | -2.0364423 | 0 | 3.99E-03 | 0.501 |
| KEGG_AMINOACYL_TRNA_BIOSYNTHESIS                                  | -2.033705  | 0 | 4.09E-03 | 0.51  |
| GO_PROTON_TRANSPORTING_ATP_SYNTHASE_COMPLEX                       | -2.0327728 | 0 | 4.10E-03 | 0.515 |
| GO_RIBONUCLEASE_ACTIVITY                                          | -2.0330467 | 0 | 4.10E-03 | 0.514 |
| GO_RNA_SPLICING_VIA_TRANSESTERIFICATION_REACTIONS                 | -2.0320709 | 0 | 4.10E-03 | 0.519 |
| GO_SPLICEOSOMAL_TRISNRNP_COMPLEX                                  | -2.0304146 | 0 | 4.15E-03 | 0.523 |
| REACTOME_BRANCHED_CHAIN_AMINOACID_CATABOLISM                      | -2.0293868 | 0 | 4.16E-03 | 0.525 |
| GO_RESPIRATORY_CHAIN                                              | -2.0282016 | 0 | 4.21E-03 | 0.53  |
| SCIAN_CELL_CYCLE_TARGETS_OF_TP53_AND_TP73_DN                      | -2.0229633 | 0 | 4.39E-03 | 0.547 |
| LE_EGR2_TARGETS_UP                                                | -2.0230393 | 0 | 4.41E-03 | 0.547 |
| GO_MITOCHONDRIAL_RESPIRATORY_CHAIN_COMPLEX_ASSEMBLY               | -2.0230582 | 0 | 4.43E-03 | 0.547 |
| GO_RNA_CATABOLIC_PROCESS                                          | -2.0204039 | 0 | 4.49E-03 | 0.561 |
| GO_PROTEIN_LOCALIZATION_TO_ENDOPLASMIC_RETICULUM                  | -2.0199234 | 0 | 4.50E-03 | 0.563 |
| REACTOME_CLEAVAGE_OF_GROWING_TRANSCRIPT_IN_THE_TERMINATION_REGION | -2.0149858 | 0 | 4.68E-03 | 0.584 |
| MOOHA_VOXPHOS                                                     | -2.0143092 | 0 | 4.68E-03 | 0.584 |
| REACTOME_CHROMOSOME_MAINTENANCE                                   | -2.0103214 | 0 | 4.90E-03 | 0.601 |



|                                                                                         |            |   |          |       |
|-----------------------------------------------------------------------------------------|------------|---|----------|-------|
| GO_NADH_DEHYDROGENASE_ACTIVITY                                                          | -2.003054  | 0 | 5.31E-03 | 0.635 |
| GO_CONDENSED_NUCLEAR_CHROMOSOME                                                         | -2.0003564 | 0 | 5.44E-03 | 0.648 |
| REACTOME_TRNA_AMINOACYLATION                                                            | -1.9974858 | 0 | 5.44E-03 | 0.658 |
| GO_OXIDATIVE_PHOSPHORYLATION                                                            | -1.9978825 | 0 | 5.46E-03 | 0.657 |
| GO_CHROMOSOME_CONDENSATION                                                              | -1.9980999 | 0 | 5.48E-03 | 0.657 |
| ZHAN_MULTIPLE_MYELOMA_SUBGROUPS                                                         | -1.9984179 | 0 | 5.50E-03 | 0.657 |
| REACTOME_EXTENSION_OF_TELOMERES                                                         | -1.9954416 | 0 | 5.51E-03 | 0.663 |
| REACTOME_METABOLISM_OF_MRNA                                                             | -1.9958578 | 0 | 5.53E-03 | 0.663 |
| CHIANG_LIVER_CANCER_SUBCLASS_UNANNOTATED_DN                                             | -1.9887396 | 0 | 5.80E-03 | 0.682 |
| GO_REPLICATION_FORK                                                                     | -1.9847032 | 0 | 5.94E-03 | 0.69  |
| LEE_BMP2_TARGETS_DN                                                                     | -1.9842999 | 0 | 5.94E-03 | 0.691 |
| GO_CYTOPLASMIC_TRANSLATION                                                              | -1.9848615 | 0 | 5.95E-03 | 0.689 |
| GO_PRECATALYTIC_SPLICEOSOME                                                             | -1.983428  | 0 | 5.97E-03 | 0.694 |
| GO_MATURATION_OF_SSU_RRNA_FROM_TRICISTRONIC_RRNA_TRANSCRIPT_SSU_RRNA_5_8S_RRNA_LSU_RRNA | -1.9782245 | 0 | 6.16E-03 | 0.718 |
| GO_PROTEIN_DNA_COMPLEX_SUBUNIT_ORGANIZATION                                             | -1.978804  | 0 | 6.17E-03 | 0.716 |
| GO_TELOMERE_MAINTENANCE_VIA_RECOMBINATION                                               | -1.9791749 | 0 | 6.17E-03 | 0.713 |
| TARTE_PLASMA_CELL_VS_PLASMA_ABLAST_DN                                                   | -1.97652   | 0 | 6.24E-03 | 0.725 |
| MOREAUX_B_LYMPHOCYTE_MATURATION_BY_TACI_DN                                              | -1.9750235 | 0 | 6.26E-03 | 0.727 |
| GO_LIGASE_ACTIVITY_FORMING_CARBON_OXYGEN_BONDS                                          | -1.9752959 | 0 | 6.26E-03 | 0.727 |
| GO_DNA_GEOMETRIC_CHANGE                                                                 | -1.9721626 | 0 | 6.37E-03 | 0.739 |
| GO_RNA_PHOSPHODIESTER_BOND_HYDROLYSIS                                                   | -1.9673762 | 0 | 6.65E-03 | 0.755 |
| GO_REGULATION_OF_MRNA_SPLICING_VIA_SPLICEOSOME                                          | -1.9665323 | 0 | 6.69E-03 | 0.759 |
| VANTVEER_BREAST_CANCER_METASTASIS_DN                                                    | -1.9655198 | 0 | 6.73E-03 | 0.761 |
| GO_CHROMOSOME_ORGANIZATION_INVOLVED_IN_MEIOTIC_CELL_CYCLE                               | -1.9647412 | 0 | 6.77E-03 | 0.765 |

|                                                   |            |   |          |       |
|---------------------------------------------------|------------|---|----------|-------|
| SCHLOSSER_MYC_TARGETS_AND_SERUM_RESPONSE_DN       | -1.9579866 | 0 | 7.15E-03 | 0.782 |
| REACTOME_PROCESSING_OF_CAPPED_INTRONLESS_PRE_MRNA | -1.9498342 | 0 | 7.63E-03 | 0.803 |
| TANG_SENESCENCE_TP53_TARGETS_DN                   | -1.9463059 | 0 | 7.81E-03 | 0.818 |
| REACTOME_DNA_REPAIR                               | -1.945084  | 0 | 7.82E-03 | 0.819 |
| GO_DNA_CONFORMATION_CHANGE                        | -1.9454901 | 0 | 7.82E-03 | 0.818 |
| GO_MRNA_METABOLIC_PROCESSES                       | -1.9401791 | 0 | 8.18E-03 | 0.831 |
| WONG_MITOCHONDRIA_GENE_MODULE                     | -1.9375548 | 0 | 8.30E-03 | 0.841 |
| IRITANI_MAD1_TARGETS_DN                           | -1.9363651 | 0 | 8.36E-03 | 0.843 |
| MITSIADES_RESPONSE_TO_APLIDIN_DN                  | -1.9328203 | 0 | 8.56E-03 | 0.855 |
| VERNELL_RETINOBLASTOMA_PATHWAY_UP                 | -1.9309503 | 0 | 8.70E-03 | 0.864 |
| KEGG_SPLICEOSOME                                  | -1.9230103 | 0 | 9.40E-03 | 0.885 |
| GO_SOMATIC_DIVERSIFICATION_OF_IMMUNE_RECEPTORS    | -1.9221232 | 0 | 9.43E-03 | 0.886 |
| REACTOME_CELL_CYCLE_CHECKPOINTS                   | -1.9214103 | 0 | 9.47E-03 | 0.891 |
| GO_NUCLEASE_ACTIVITY                              | -1.9205034 | 0 | 9.53E-03 | 0.893 |
| YU_MYC_TARGETS_UP                                 | -1.9192064 | 0 | 9.59E-03 | 0.896 |
| JOHNSTONE_PARVB_TARGETS_3_DN                      | -1.9179076 | 0 | 9.64E-03 | 0.9   |
| GO_TRNA_PROCESSING                                | -1.9169971 | 0 | 9.70E-03 | 0.903 |
| WHITFIELD_CELL_CYCLE_LITERATURE                   | -1.9157039 | 0 | 9.78E-03 | 0.905 |
| GO_RNA_SPLICING                                   | -1.9147022 | 0 | 9.84E-03 | 0.908 |
| PID_AURORA_B_PATHWAY                              | -1.9081205 | 0 | 1.03E-02 | 0.919 |
| LEE_METASTASIS_AND_RNA_PROCESSING_UP              | -1.9030626 | 0 | 1.06E-02 | 0.925 |
| GO_RAN_GTPASE_BINDING                             | -1.8992962 | 0 | 1.09E-02 | 0.932 |
| MARIADASON_RESPONSE_TO_BUTYRATE_SULINDAC_4        | -1.8970667 | 0 | 1.10E-02 | 0.937 |
| KAUFFMANN_DNA_REPLICATION_GENES                   | -1.8975507 | 0 | 1.10E-02 | 0.936 |
| GO_MEIOTIC_CELL_CYCLE                             | -1.8978089 | 0 | 1.10E-02 | 0.936 |
| REACTOME_MRNA_SPLICING_MINOR_PATHWAY              | -1.8978766 | 0 | 1.10E-02 | 0.936 |
| GO_MEIOTIC_CELL_CYCLE_PROCESS                     | -1.8931545 | 0 | 1.13E-02 | 0.943 |
| GO_PROTEIN_LOCALIZATION_TO_CHROMOSOME             | -1.8909372 | 0 | 1.15E-02 | 0.945 |

|                                                              |            |   |          |       |
|--------------------------------------------------------------|------------|---|----------|-------|
| GO_CATALYTIC_STEP_2_SPLICED_SOME                             | -1.889588  | 0 | 1.15E-02 | 0.945 |
| GO_DOUBLE_STRAND_BREAK_REPAIR                                | -1.8871117 | 0 | 1.16E-02 | 0.948 |
| REACTOME_TRANSPORT_OF_MATURE_TRANSCRIPT_TO_CYTOPLASM         | -1.8875479 | 0 | 1.16E-02 | 0.948 |
| GO_DNA_PACKAGING                                             | -1.8861384 | 0 | 1.17E-02 | 0.949 |
| GO_SOMATIC_RECOMBINATION_OF_IMMUNOGLOBULIN_GENE_SEGMENTS     | -1.8845189 | 0 | 1.18E-02 | 0.952 |
| GO_TRANSLATION_INITIATION_FACTOR_ACTIVITY                    | -1.883813  | 0 | 1.19E-02 | 0.952 |
| IKEDA_MIR30_TARGETS_DN                                       | -1.8779494 | 0 | 1.24E-02 | 0.952 |
| GO_RIBONUCLEOPROTEIN_COMPLEX                                 | -1.8781248 | 0 | 1.24E-02 | 0.952 |
| REACTOME_MEIOSIS                                             | -1.8713695 | 0 | 1.30E-02 | 0.96  |
| GO_SNRNA_BINDING                                             | -1.8713715 | 0 | 1.30E-02 | 0.96  |
| GRAHAM_CML_DIVIDING_VS_NORMAL QUIESCENT UP                   | -1.8720988 | 0 | 1.30E-02 | 0.96  |
| KEGG_NUCLEOTIDE_EXCISION_REPAIR                              | -1.8684937 | 0 | 1.33E-02 | 0.964 |
| MODY_HIPPOCAMPUS_PRENATAL                                    | -1.8680393 | 0 | 1.33E-02 | 0.965 |
| GO_DNA_PACKAGING_COMPLEX                                     | -1.8581667 | 0 | 1.41E-02 | 0.974 |
| GO_NADH_DEHYDROGENASE_COMPLEX                                | -1.8583031 | 0 | 1.42E-02 | 0.974 |
| NELSON_RESPONSE_TO_ANDROGEN_DN                               | -1.8554463 | 0 | 1.45E-02 | 0.977 |
| BOYALT_LIVER_CANCER_SUBCLASS G3 UP                           | -1.852529  | 0 | 1.48E-02 | 0.979 |
| GO_PROTEIN_COMPLEX_LOCALIZATION                              | -1.8433392 | 0 | 1.58E-02 | 0.981 |
| KEGG_VALINE_LEUCINE_AND_Isoleucine DEGRADATION               | -1.8405235 | 0 | 1.61E-02 | 0.982 |
| GO_REGULATION_OF_CHROMOSOME SEGREGATION                      | -1.8369672 | 0 | 1.65E-02 | 0.983 |
| GO_SMALL_NUCLEAR_RIBONUCLEOPROTEIN_COMPLEX                   | -1.8371911 | 0 | 1.65E-02 | 0.983 |
| GO_RIBONUCLEOPROTEIN_COMPLEX LOCALIZATION                    | -1.8330393 | 0 | 1.69E-02 | 0.983 |
| SCHUHMACHER_MYC_TARGETS_UP                                   | -1.830725  | 0 | 1.71E-02 | 0.984 |
| GO_NUCLEAR_TRANSCRIBED_MRNA_CATABOLIC_PROCESS_EXONUCLEOLYTIC | -1.8283001 | 0 | 1.74E-02 | 0.985 |
| GO_CENTROSOME_CYCLE                                          | -1.8277206 | 0 | 1.74E-02 | 0.985 |

|                                                                         |            |   |          |       |
|-------------------------------------------------------------------------|------------|---|----------|-------|
| GO_TRNA_BINDING                                                         | -1.8236291 | 0 | 1.79E-02 | 0.986 |
| REACTOME_TRANSPORT_OF_MATURE_MRNA_DERIVED_FROM_AN_INTRONLESS_TRANSCRIPT | -1.8239187 | 0 | 1.79E-02 | 0.986 |
| GO_NEGATIVE_REGULATION_OF_MITOTIC_NUCLEAR_DIVISION                      | -1.8214928 | 0 | 1.82E-02 | 0.989 |
| GRADE_COLON_AND_RECTAL_CANCER_UP                                        | -1.8079123 | 0 | 1.99E-02 | 0.994 |
| REACTOME_RNA_POL_II_TRANSCRIPTION                                       | -1.8084198 | 0 | 2.00E-02 | 0.994 |
| RUIZ_TNC_TARGETS_DN                                                     | -1.8031473 | 0 | 2.07E-02 | 0.997 |
| GO_RRNA_BINDING                                                         | -1.802315  | 0 | 2.08E-02 | 0.997 |
| TIEN_INTESTINE_PROBIOTICS_24HR_UP                                       | -1.7997254 | 0 | 2.12E-02 | 0.997 |
| MENSSEN_MYC_TARGETS                                                     | -1.7994329 | 0 | 2.12E-02 | 0.997 |
| SANSOM_APC_TARGETS_UP                                                   | -1.7966429 | 0 | 2.15E-02 | 0.997 |
| GO_INTRACILIARY_TRANSPORT                                               | -1.7945349 | 0 | 2.16E-02 | 0.997 |
| GO_CHROMATIN_ASSEMBLY_OR_DISASSEMBLY                                    | -1.7921681 | 0 | 2.19E-02 | 0.997 |
| GO_MITOCHONDRIAL_MEMBRANE_PART                                          | -1.7890564 | 0 | 2.25E-02 | 0.999 |
| GO_NUCLEIC_ACID_PHOSPHODIESTER_BOND_HYDROLYSIS                          | -1.7808735 | 0 | 2.37E-02 | 1     |
| GO_MITOCHONDRIAL_TRANSMEMBRANE_TRANSPORT                                | -1.7796048 | 0 | 2.39E-02 | 1     |
| TOYOTA_TARGETS_OF_MIR34B_AND_MIR34C                                     | -1.778119  | 0 | 2.40E-02 | 1     |
| HALLMARK_MYC_TARGETS_V2                                                 | -1.7781357 | 0 | 2.41E-02 | 1     |
| LINDGREN_BLADDER_CANCER_CLUSTER_3_UP                                    | -1.7784126 | 0 | 2.41E-02 | 1     |
| NAKAYAMA_SOFT_TISSUE_TUMORS_PCA2_UP                                     | -1.7751089 | 0 | 2.45E-02 | 1     |
| MALONEY_RESPONSE_TO_17AAG_DN                                            | -1.7696918 | 0 | 2.53E-02 | 1     |
| GO_CHROMOSOME_TELOMERIC_REGION                                          | -1.7691748 | 0 | 2.54E-02 | 1     |
| MOREAUX_MULTIPLE_MYELOMABY_TACI_DN                                      | -1.7618749 | 0 | 2.66E-02 | 1     |
| REACTOME_S_PHASE                                                        | -1.7587535 | 0 | 2.71E-02 | 1     |
| GO_PROTEIN_PEPTIDYL_PROLYLISOMERIZATION                                 | -1.7579278 | 0 | 2.72E-02 | 1     |
| GO_DNA_TEMPLATED_TRANSCRIPTION_TERMINATION                              | -1.7545375 | 0 | 2.77E-02 | 1     |
| SARRIO_EPITHELIAL_MESENCHYMAL_TRANSITION_UP                             | -1.7545646 | 0 | 2.78E-02 | 1     |
| PAL_PRMT5_TARGETS_UP                                                    | -1.7502209 | 0 | 2.85E-02 | 1     |

|                                                                                                                            |            |   |          |   |
|----------------------------------------------------------------------------------------------------------------------------|------------|---|----------|---|
| BLUM_RESPONSE_TO_SALIRASIB<br>DN                                                                                           | -1.7498065 | 0 | 2.85E-02 | 1 |
| PYEON_HPVP_POSITIVE_TUMORS_<br>UP                                                                                          | -1.7494633 | 0 | 2.85E-02 | 1 |
| VECCHI_GASTRIC_CANCER_EARLY<br>UP                                                                                          | -1.7459084 | 0 | 2.88E-02 | 1 |
| REACTOME_SYNTHESIS_OF_DNA                                                                                                  | -1.7452798 | 0 | 2.88E-02 | 1 |
| GAZDA_DIAMOND_BLACKFAN_ANEMIA<br>PROGENITOR DN                                                                             | -1.7433413 | 0 | 2.91E-02 | 1 |
| NAKAMURA_CANCER_MICROENVIRONMENT<br>DN                                                                                     | -1.7429074 | 0 | 2.91E-02 | 1 |
| GO_MITOTIC_SISTER_CHROMATID<br>SEGREGATION                                                                                 | -1.7343864 | 0 | 3.06E-02 | 1 |
| ZHANG_RESPONSE_TO_CANTHARIDIN<br>DN                                                                                        | -1.7344747 | 0 | 3.06E-02 | 1 |
| REACTOME_REGULATION_OF_MITOTIC<br>CELL CYCLE                                                                               | -1.7330563 | 0 | 3.06E-02 | 1 |
| REACTOME_HIV_LIFE_CYCLE                                                                                                    | -1.7324461 | 0 | 3.07E-02 | 1 |
| REACTOME_APC_C_CDH1_MEDIATED<br>DEGRADATION_OF_CDC20_AND_OTHER<br>APC_C_CDH1_TARGETED_PROTEINS_IN<br>LATE_MITOSIS EARLY G1 | -1.729688  | 0 | 3.11E-02 | 1 |
| GO_ATP_DEPENDENT_CHROMATIN<br>REMODELING                                                                                   | -1.7302943 | 0 | 3.11E-02 | 1 |
| GO_SPLICEOSOMAL_COMPLEX                                                                                                    | -1.7262076 | 0 | 3.18E-02 | 1 |
| WANG_RESPONSE_TO_GSK3_INHIBITOR<br>SB216763 DN                                                                             | -1.7222751 | 0 | 3.26E-02 | 1 |
| GO_DNA_POLYMERASE_ACTIVITY                                                                                                 | -1.7202244 | 0 | 3.28E-02 | 1 |
| GO_CELL_RECOGNITION                                                                                                        | -1.7165861 | 0 | 3.35E-02 | 1 |
| BURTON_ADIPOGENESIS_PEAK_AT<br>16HR                                                                                        | -1.7167016 | 0 | 3.36E-02 | 1 |
| FOURNIER_ACINAR_DEVELOPMENT<br>LATE 2                                                                                      | -1.7141271 | 0 | 3.40E-02 | 1 |
| GO_CYTOSOLIC_PART                                                                                                          | -1.7131348 | 0 | 3.41E-02 | 1 |
| GO_CELL_REDOX_HOMEOSTASIS                                                                                                  | -1.7120179 | 0 | 3.42E-02 | 1 |
| GO_MRNA_PROCESSING                                                                                                         | -1.6991675 | 0 | 3.70E-02 | 1 |
| REACTOME_TRANSCRIPTION                                                                                                     | -1.6960592 | 0 | 3.77E-02 | 1 |
| GO_OXIDOREDUCTASE_COMPLEX                                                                                                  | -1.6962394 | 0 | 3.77E-02 | 1 |
| GO_PHOTORECEPTOR_CONNECTING<br>CILIA                                                                                       | -1.6899316 | 0 | 3.94E-02 | 1 |
| MILI_PSEUDOPODIA_CHEMOTAXIS<br>UP                                                                                          | -1.6873559 | 0 | 3.98E-02 | 1 |
| CHIANG_LIVER_CANCER_SUBCLASS<br>PROLIFERATION UP                                                                           | -1.6831113 | 0 | 4.09E-02 | 1 |

|                                                                             |            |   |          |   |
|-----------------------------------------------------------------------------|------------|---|----------|---|
| SANSOM_APC_TARGETS                                                          | -1.6809139 | 0 | 4.14E-02 | 1 |
| REACTOME_APC_C_CDC20_MEDIATED_DEGRADATION_OF_MITOTIC_PROTEINS               | -1.6788803 | 0 | 4.19E-02 | 1 |
| GO_QUINONE_METABOLIC_PROCESS                                                | -1.6743364 | 0 | 4.31E-02 | 1 |
| PENG_LEUCINE_DEPRIVATION_DN                                                 | -1.6705128 | 0 | 4.39E-02 | 1 |
| GO_DNA_METABOLIC_PROCESS                                                    | -1.6547999 | 0 | 4.83E-02 | 1 |
| HAMAI_APOPTOSIS_VIA_TRAIL_UP                                                | -1.653433  | 0 | 4.85E-02 | 1 |
| GO_NUCLEOTIDE_EXCISION_REPAIR                                               | -1.6480132 | 0 | 5.00E-02 | 1 |
| GO_DNA_REPAIR                                                               | -1.6365308 | 0 | 5.39E-02 | 1 |
| BENPORATH_CYCLING_GENES                                                     | -1.6328033 | 0 | 5.48E-02 | 1 |
| CHEMNITZ_RESPONSE_TO_PROSTAGLANDIN_E2_UP                                    | -1.6331615 | 0 | 5.49E-02 | 1 |
| GAVIN_FOXP3_TARGETS_CLUSTER_P6                                              | -1.631059  | 0 | 5.53E-02 | 1 |
| LEE_LIVER_CANCER_SURVIVAL_DN                                                | -1.6294492 | 0 | 5.58E-02 | 1 |
| GO_CHROMOSOME                                                               | -1.6247091 | 0 | 5.73E-02 | 1 |
| BORCZUK_MALIGNANT_MESOTHELIOMA_UP                                           | -1.6224124 | 0 | 5.80E-02 | 1 |
| GO_PROTEIN_DNA_COMPLEX                                                      | -1.6168284 | 0 | 5.99E-02 | 1 |
| GO_HUMORAL_IMMUNE_RESPONSE                                                  | -1.6171271 | 0 | 5.99E-02 | 1 |
| IVANOVA_HEMATOPOIESIS_INTERMEDIATE_PROGENITOR                               | -1.6159132 | 0 | 6.00E-02 | 1 |
| CASORELLI_ACUTE_PROMYELOCYTIC_LEUKEMIA_DN                                   | -1.6116334 | 0 | 6.16E-02 | 1 |
| GO_HOMOPHILIC_CELL_ADHESION_VIA_PLASMA_MEMBRANE_ADHESION_MOLECULES          | -1.6103646 | 0 | 6.18E-02 | 1 |
| GO_NUCLEAR_CHROMOSOME_TELOMERIC_REGION                                      | -1.6072797 | 0 | 6.28E-02 | 1 |
| MORI_MATURE_B_LYMPHOCYTE_DN                                                 | -1.6074524 | 0 | 6.28E-02 | 1 |
| GO_AMIDE_BIOSYNTHETIC_PROCESS                                               | -1.6031382 | 0 | 6.38E-02 | 1 |
| WEI_MYCN_TARGETS_WITH_EBOX                                                  | -1.5997937 | 0 | 6.46E-02 | 1 |
| KEGG_OXIDATIVE_PHOSPHORYLATION                                              | -1.5969752 | 0 | 6.55E-02 | 1 |
| GO_TRANSFERASE_ACTIVITY_TRANSFERRING_ALKYL_OR_ARYL_OTHER_THAN_METHYL_GROUPS | -1.5955685 | 0 | 6.57E-02 | 1 |

|                                                              |            |   |          |   |
|--------------------------------------------------------------|------------|---|----------|---|
| GO_ELECTRON_TRANSPORT_CHAIN                                  | -1.5941863 | 0 | 6.59E-02 | 1 |
| AFFAR_YY1_TARGETS_DN                                         | -1.5910951 | 0 | 6.70E-02 | 1 |
| CHICAS_RB1_TARGETS_GROWING                                   | -1.5885978 | 0 | 6.79E-02 | 1 |
| PENG_GLUTAMINE_DEPRIVATION_DN                                | -1.5841917 | 0 | 6.98E-02 | 1 |
| GARCIA_TARGETS_OF_FLI1_AND_DAX1_DN                           | -1.5833141 | 0 | 7.01E-02 | 1 |
| GO_CELL_CELL_ADHESION_VIA_PLASMA_MEMBRANE_ADHESION_MOLECULES | -1.5797354 | 0 | 7.15E-02 | 1 |
| GO_NUCLEAR_EXPORT                                            | -1.5755546 | 0 | 7.30E-02 | 1 |
| SHEPARD_CRUSH_AND_BURN_MUTANT_DN                             | -1.5657848 | 0 | 7.63E-02 | 1 |
| GO_ORGANELLE_FISSION                                         | -1.5538926 | 0 | 8.11E-02 | 1 |
| GO_MACROMOLECULAR_COMPLEX_DISASSEMBLY                        | -1.5522444 | 0 | 8.15E-02 | 1 |
| VEGF_A_UP.V1_DN                                              | -1.552468  | 0 | 8.15E-02 | 1 |
| YAO_TEMPORAL_RESPONSE_TO_PROGESTERONE_CLUSTER_14             | -1.5492555 | 0 | 8.26E-02 | 1 |
| RODRIGUES_THYROID_CARCINOMA_ANAPLASTIC_UP                    | -1.5492647 | 0 | 8.27E-02 | 1 |
| GO_NEGATIVE_REGULATION_OF_SYNAPTIC_TRANSMISSION              | -1.5472966 | 0 | 8.29E-02 | 1 |
| BENPORATH_ES_1                                               | -1.5241921 | 0 | 9.36E-02 | 1 |
| GO_CENTRIOLE                                                 | -1.508479  | 0 | 1.01E-01 | 1 |
| KARLSSON_TGFB1_TARGETS_UP                                    | -1.5035982 | 0 | 1.04E-01 | 1 |
| GCNP_SHH_UP_LATE.V1_UP                                       | -1.5017421 | 0 | 1.04E-01 | 1 |
| GO_MITOTIC_NUCLEAR_DIVISION                                  | -1.5013794 | 0 | 1.05E-01 | 1 |
| GO_HELICASE_ACTIVITY                                         | -1.470066  | 0 | 1.22E-01 | 1 |
| SENGUPTA_NASOPHARYNGEAL_CARCINOMA_WITH_LMP1_UP               | -1.4651562 | 0 | 1.24E-01 | 1 |
| WHITFIELD_CELL_CYCLE_S                                       | -1.4636275 | 0 | 1.25E-01 | 1 |
| HALLMARK_OXIDATIVE_PHOSPHORYLATION                           | -1.4600822 | 0 | 1.27E-01 | 1 |
| GO_CHROMOSOME_ORGANIZATION                                   | -1.4547433 | 0 | 1.30E-01 | 1 |
| BOYLAN_MULTIPLE_MYELOMA_CD_UP                                | -1.4489841 | 0 | 1.33E-01 | 1 |
| RICKMAN_TUMOR_DIFFERENTIATED_WELL_VS_POORLY_UP               | -1.4415766 | 0 | 1.38E-01 | 1 |
| BERENJENO_TRANSFORMED_BY_RHOA_UP                             | -1.4373509 | 0 | 1.40E-01 | 1 |
| CONCANNON_APOPTOSIS_BY_EPIDOXOMICIN_DN                       | -1.4379563 | 0 | 1.40E-01 | 1 |

|                                                                |            |   |          |   |
|----------------------------------------------------------------|------------|---|----------|---|
| OUELLET_OVARIAN_CANCER_INVASIVE VS LMP UP                      | -1.4305875 | 0 | 1.44E-01 | 1 |
| MOOHA_HUMAN_MITODB_6_2002                                      | -1.4160346 | 0 | 1.55E-01 | 1 |
| GO_CELLULAR_RESPIRATION                                        | -1.4125538 | 0 | 1.58E-01 | 1 |
| GO_CELLULAR_MACROMOLECULAR_COMPLEX_ASSEMBLY                    | -1.4103186 | 0 | 1.59E-01 | 1 |
| REACTOME_RNA_POL_I_RNA_POL_III_AND_MITOCHONDRIAL_TRANSCRIPTION | -1.4079702 | 0 | 1.61E-01 | 1 |
| NFE2L2.V2                                                      | -1.4070404 | 0 | 1.61E-01 | 1 |
| SENGUPTA_NASOPHARYNGEAL_CARCINOMA UP                           | -1.4029816 | 0 | 1.64E-01 | 1 |
| GO_PEPTIDE_METABOLIC_PROCESS                                   | -1.3991277 | 0 | 1.67E-01 | 1 |
| GO_ISOMERASE_ACTIVITY                                          | -1.3931388 | 0 | 1.70E-01 | 1 |
| CSR_LATE_UP.V1_UP                                              | -1.3820891 | 0 | 1.77E-01 | 1 |
| GO_CENTRAL_NERVOUS_SYSTEM_NEURON_DIFFERENTIATION               | -1.3717731 | 0 | 1.84E-01 | 1 |
| RAMALHO_STEMNESS_UP                                            | -1.3707092 | 0 | 1.85E-01 | 1 |
| GO_NUCLEAR_CHROMOSOME                                          | -1.3687268 | 0 | 1.86E-01 | 1 |
| GO_PRIMARY_CILIUM                                              | -1.3444443 | 0 | 2.05E-01 | 1 |
| GO_PROTEIN_FOLDING                                             | -1.340986  | 0 | 2.08E-01 | 1 |
| MOOHA_MITOCHONDRIA                                             | -1.3292915 | 0 | 2.18E-01 | 1 |
| BASAKI_YBX1_TARGETS_UP                                         | -1.3187628 | 0 | 2.28E-01 | 1 |
| GO_MITOTIC_CELL_CYCLE                                          | -1.2978681 | 0 | 2.47E-01 | 1 |
| GO_ORGANIC_CYCLIC_COMPOUND_CATABOLIC_PROCESS                   | -1.2865189 | 0 | 2.58E-01 | 1 |
| GO_MITOCHONDRIAL_PART                                          | -1.2850395 | 0 | 2.58E-01 | 1 |
| WHITFIELD_CELL_CYCLE_G2_M                                      | -1.2804883 | 0 | 2.63E-01 | 1 |
| REACTOME_METABOLISM_OF_PROTEINS                                | -1.2745355 | 0 | 2.69E-01 | 1 |
| STARK_PREFRONTAL_CORTEX_22Q11_DELETION DN                      | -1.2636421 | 0 | 2.82E-01 | 1 |
| MARTENS_TRETINOIN_RESPONSE DN                                  | -1.2592951 | 0 | 2.86E-01 | 1 |
| SHEN_SMARCA2_TARGETS_UP                                        | -1.248782  | 0 | 2.99E-01 | 1 |
| WEST_ADRENOCORTICAL_TUMOR UP                                   | -1.2456837 | 0 | 3.01E-01 | 1 |
| GO_NUCLEOLUS                                                   | -1.2408242 | 0 | 3.07E-01 | 1 |
| GO_ORGANELLE_INNER_MEMBRANE                                    | -1.2395691 | 0 | 3.08E-01 | 1 |
| GO_CILIUM                                                      | -1.2269989 | 0 | 3.23E-01 | 1 |
| KRIGE_RESPONSE_TO_TOSEDOS TAT_24HR DN                          | -1.1853538 | 0 | 3.77E-01 | 1 |



|                                                                 |            |            |          |       |
|-----------------------------------------------------------------|------------|------------|----------|-------|
| GO_PROTEIN_LOCALIZATION_TO_ORGANELLE                            | -1.1836272 | 0          | 3.79E-01 | 1     |
| SMID_BREAST_CANCER_BASAL_UP                                     | -1.1698909 | 0          | 3.98E-01 | 1     |
| GEORGES_TARGETS_OF_MIR192_AND_MIR215                            | -1.1522197 | 0          | 4.26E-01 | 1     |
| KIM_WT1_TARGETS_DN                                              | -1.1240956 | 0          | 4.72E-01 | 1     |
| IVANOVA_HEMATOPOIESIS_EARLY_PROGENITOR                          | -1.1205506 | 0          | 4.77E-01 | 1     |
| GRAESSMANN_RESPONSE_TO_M_C_AND_DOXORUBICIN_DN                   | -1.0994998 | 0          | 5.06E-01 | 1     |
| GO_INTRAMOLECULAR_OXIDOREDUCTASE_ACTIVITY_TRANSPOSING_S_S_BONDS | -1.8673164 | 0.00310559 | 1.33E-02 | 0.966 |
| REACTOME_MITOCHONDRIAL_TRANAMINOACYLATION                       | -1.8965714 | 0.00323625 | 1.10E-02 | 0.938 |
| GO_CHROMOSOME_SEPARATION                                        | -1.8188921 | 0.00324675 | 1.85E-02 | 0.991 |
| GO_PHAGOCYTOSIS_RECOGNITION                                     | -1.9632922 | 0.00341297 | 6.83E-03 | 0.766 |
| GO_DNA_STRAND_ELONGATION_INVOLVED_IN_DNA_REPLICATION            | -1.9058698 | 0.00341297 | 1.05E-02 | 0.922 |
| GO_PYRIMIDINE_DEOXYRIBONUCLEOTIDE_METABOLIC_PROCESS             | -1.9016821 | 0.00341297 | 1.07E-02 | 0.929 |
| REACTOME_MRNA_3_END_PROCESSING                                  | -1.8886789 | 0.00344828 | 1.16E-02 | 0.946 |
| GO_SPINDLE_CHECKPOINT                                           | -1.7301264 | 0.00344828 | 3.11E-02 | 1     |
| REACTOME_APC_C_CDC20_MEDIATED_DEGRADATION_OF_CYCLIN_B           | -1.7414984 | 0.00346021 | 2.93E-02 | 1     |
| GO_SOMATIC_DIVERSIFICATION_OF_IMMUNOGLOBULINS                   | -1.794429  | 0.00347222 | 2.16E-02 | 0.997 |
| KEGG_MISMATCH_REPAIR                                            | -1.9749538 | 0.0034965  | 6.23E-03 | 0.727 |
| GO_ENDORIBONUCLEASE_ACTIVITY_PRODUCING_5_PHOSPHOMONOESTERS      | -1.8401909 | 0.0034965  | 1.61E-02 | 0.982 |
| GO_SPINAL_CORD_MOTOR_NEURON_DIFFERENTIATION                     | -1.9039191 | 0.00352113 | 1.06E-02 | 0.924 |
| REACTOME_ACTIVATION_OF_THE_PRE_REPLICATIVE_COMPLEX              | -1.9484867 | 0.00358423 | 7.65E-03 | 0.807 |
| GO_U12_TYPE_SPLICEOSOMAL_COMPLEX                                | -1.893825  | 0.00358423 | 1.12E-02 | 0.943 |
| REACTOME_DNA_STRAND_ELONGATION                                  | -2.0294516 | 0.00361011 | 4.18E-03 | 0.525 |
| GO_DNA_BINDING_BENDING                                          | -1.7332556 | 0.00362319 | 3.07E-02 | 1     |
| GO_PROTEIN_TRANSPORT_ALONG_MICROTUBULE                          | -1.8362902 | 0.00363636 | 1.65E-02 | 0.983 |
| GO_U2_TYPE_SPLICEOSOMAL_COMPLEX                                 | -1.6672591 | 0.00363636 | 4.48E-02 | 1     |

|                                                                                                 |            |            |          |       |
|-------------------------------------------------------------------------------------------------|------------|------------|----------|-------|
| GO_RNA_PHOSPHODIESTER_BOND_HYDROLYSIS_EXONUCLEOLYTIC                                            | -1.6534845 | 0.00367647 | 4.86E-02 | 1     |
| GO_RNA_SECONDARY_STRUCTURE_UNWINDING                                                            | -1.8716078 | 0.00369004 | 1.31E-02 | 0.96  |
| JIANG_HYPOXIA_VIA_VHL                                                                           | -1.795508  | 0.0037594  | 2.16E-02 | 0.997 |
| LY_AGING_MIDDLE_DN                                                                              | -2.0933025 | 0.00381679 | 2.32E-03 | 0.307 |
| GO_SMALL_SUBUNIT_PROCESSOME                                                                     | -1.8080784 | 0.00381679 | 2.00E-02 | 0.994 |
| LI_WILMS_TUMOR_VS_FETAL_KIDNEY_2_UP                                                             | -1.5699098 | 0.00384615 | 7.47E-02 | 1     |
| REACTOME_E2F_MEDIATED_REGULATION_OF_DNA_REPLICATION                                             | -1.7474756 | 0.00395257 | 2.88E-02 | 1     |
| VANTVEER_BREAST_CANCER_BRCA1_UP                                                                 | -1.9495742 | 0.00396825 | 7.62E-03 | 0.803 |
| GO_HOMOLOGOUS_CHROMOSOME_SEGREGATION                                                            | -1.796975  | 0.00406504 | 2.15E-02 | 0.997 |
| BURTON_ADIPOGENESIS_PEAK_AT_24HR                                                                | -1.7079865 | 0.00406504 | 3.50E-02 | 1     |
| GO_CIS_TRANS_ISOMERASE_ACTIVITY                                                                 | -1.8232617 | 0.00408163 | 1.79E-02 | 0.987 |
| GO_TRNA_TRANSPORT                                                                               | -1.6331159 | 0.00408163 | 5.48E-02 | 1     |
| KEGG_BASE_EXCISION_REPAIR                                                                       | -1.8309333 | 0.00411523 | 1.71E-02 | 0.984 |
| GO_SPLICEOSOMAL_SNRNP_ASSEMBLY                                                                  | -1.9090523 | 0.00413223 | 1.03E-02 | 0.918 |
| REACTOME_GLOBAL_GENOMIC_NER_GG_NER                                                              | -1.5264044 | 0.0041841  | 9.25E-02 | 1     |
| IWANAGA_E2F1_TARGETS_INDUCED_BY_SERUM                                                           | -1.8672645 | 0.00420168 | 1.33E-02 | 0.966 |
| GO_SOMATIC_DIVERSIFICATION_OF_IMMUNE_RECEPTORS_VIA_GERMLINE_RECOMBINATION_WITHIN_A_SINGLE_LOCUS | -2.104186  | 0.00438597 | 2.08E-03 | 0.27  |
| GO_REGULATION_OF_SYNAPTIC_TRANSMISSION_Glutamatergic                                            | -1.571537  | 0.00438597 | 7.43E-02 | 1     |
| GO_BASE_EXCISION_REPAIR                                                                         | -1.7657889 | 0.00442478 | 2.58E-02 | 1     |
| GO_TRNA_MODIFICATION                                                                            | -1.7484667 | 0.00442478 | 2.86E-02 | 1     |
| REACTOME_MITOCHONDRIAL_PROTEIN_IMPORT                                                           | -1.7014955 | 0.00444445 | 3.65E-02 | 1     |
| KLEIN_PRIMARY_EFFUSION_LYMPHOMA_DN                                                              | -1.6359586 | 0.00454545 | 5.40E-02 | 1     |
| GO_TERMINATION_OF_RNA_POLYMERASE_II_TRANSCRIPTION                                               | -1.7463595 | 0.00456621 | 2.88E-02 | 1     |
| GO_PROTEIN_TARGETING_TO_MITOCHONDRION                                                           | -1.6702343 | 0.0046083  | 4.39E-02 | 1     |

|                                                              |            |            |          |       |
|--------------------------------------------------------------|------------|------------|----------|-------|
| SCHLOSSER_MYC_TARGETS_AND_SERUM_RESPONSE_UP                  | -1.8622515 | 0.00492611 | 1.38E-02 | 0.972 |
| GO_DEOXYRIBONUCLEASE_ACTIVITY                                | -1.722122  | 0.005      | 3.26E-02 | 1     |
| PID_FANCONI_PATHWAY                                          | -1.9185114 | 0.00507614 | 9.64E-03 | 0.898 |
| KEGG_RNA_DEGRADATION                                         | -1.7248378 | 0.00510204 | 3.20E-02 | 1     |
| GO_DNA_HELICASE_ACTIVITY                                     | -1.721625  | 0.00518135 | 3.26E-02 | 1     |
| GO_NUCLEOLAR_PART                                            | -1.6041789 | 0.0052356  | 6.37E-02 | 1     |
| GO_CILIARY_BASAL_BODY                                        | -1.4391246 | 0.00549451 | 1.39E-01 | 1     |
| SLEBOS_HEAD_AND_NECK_CANCER_WITH_HPV_UP                      | -1.547531  | 0.00564972 | 8.32E-02 | 1     |
| MORI_PRE_BI_LYMPHOCYTE_UP                                    | -1.5960205 | 0.00617284 | 6.57E-02 | 1     |
| GO_ANAPHASE_PROMOTING_COMPLEX_DEPENDENT_CATABOLIC_PROCESS    | -1.5240059 | 0.00628931 | 9.35E-02 | 1     |
| REACTOME_M_G1_TRANSITION                                     | -1.6286346 | 0.00632911 | 5.61E-02 | 1     |
| GO_MITOCHONDRIAL_ATP_SYNTHESIS_COUPLED_PROTON_TRANSPORT      | -1.8798611 | 0.00636943 | 1.23E-02 | 0.952 |
| REACTOME_FANCONI_ANEMIA_PATHWAY                              | -1.7809943 | 0.00641026 | 2.37E-02 | 1     |
| DEBOSSCHER_NFKB_TARGETS_REPRESSED_BY_GLUCOCORTICOIDS         | -1.9341197 | 0.00671141 | 8.48E-03 | 0.848 |
| MORI_EMU_MYC_LYMPHOMA_BY_ONSET_TIME_UP                       | -1.4837611 | 0.00675676 | 1.14E-01 | 1     |
| GO_DNA_SECONDARY_STRUCTURE_BINDING                           | -1.9728744 | 0.00699301 | 6.34E-03 | 0.736 |
| GO_NEGATIVE_REGULATION_OF_CHROMOSOME_SEGREGATION             | -1.7687477 | 0.00704225 | 2.54E-02 | 1     |
| REACTOME_G1_S_TRANSITION                                     | -1.6024923 | 0.0070922  | 6.38E-02 | 1     |
| WEST_ADRENOCORTICAL_TUMOR_MARKERS_UP                         | -1.6866105 | 0.00714286 | 3.99E-02 | 1     |
| HAHTOLA_MYCOSIS_FUNGOIDES_CD4_DN                             | -1.5796355 | 0.00719425 | 7.12E-02 | 1     |
| GO_ENDONUCLEASE_ACTIVITY                                     | -1.8693486 | 0.00729927 | 1.32E-02 | 0.963 |
| REACTOME_ACTIVATION_OF_ATR_IN_RESPONSE_TO_REPLICATION_STRESS | -1.8590806 | 0.00743494 | 1.42E-02 | 0.973 |
| GO_BINDING_OF_SPERM_TO_ZONA_PELLUCIDA                        | -1.6487145 | 0.00757576 | 4.98E-02 | 1     |
| GO_RNA_POLYMERASE_COMPLEX                                    | -1.4377512 | 0.00763359 | 1.40E-01 | 1     |
| GO_TRANSCRIPTION_COUPLED_NUCLEOTIDE_EXCISION_REPAIR          | -1.4568753 | 0.00775194 | 1.29E-01 | 1     |
| MIKKELSEN_ES_HCP_WITH_H3K27ME3                               | -1.8183779 | 0.00796813 | 1.85E-02 | 0.991 |

|                                                                                                      |            |            |          |       |
|------------------------------------------------------------------------------------------------------|------------|------------|----------|-------|
| GO_CENTROSOME_DUPLICATION                                                                            | -1.7329624 | 0.008      | 3.06E-02 | 1     |
| PID_ATM_PATHWAY                                                                                      | -1.7389603 | 0.00806452 | 2.98E-02 | 1     |
| PID_BARD1_PATHWAY                                                                                    | -1.7748884 | 0.00819672 | 2.45E-02 | 1     |
| GO_RNA_CAPPING                                                                                       | -1.6885667 | 0.00826446 | 3.95E-02 | 1     |
| GO_7_METHYLGUANOSINE_RNA_CAPPING                                                                     | -1.6823592 | 0.0083682  | 4.10E-02 | 1     |
| WHITFIELD_CELL_CYCLE_G1_S                                                                            | -1.3819922 | 0.00840336 | 1.77E-01 | 1     |
| GO_DNA_REPAIR_COMPLEX                                                                                | -1.7448764 | 0.00843882 | 2.89E-02 | 1     |
| GO_3_5_EXONUCLEASE_ACTIVIT<br>Y                                                                      | -1.727597  | 0.00843882 | 3.15E-02 | 1     |
| DAIRKEE_CANCER_PRONE_RESP<br>ONSE BPA                                                                | -1.625986  | 0.00884956 | 5.69E-02 | 1     |
| GO_DNA_BIOSYNTHETIC_PROCE<br>SS                                                                      | -1.4670559 | 0.00900901 | 1.23E-01 | 1     |
| REACTOME_RNA_POL_II_TRANSC<br>RIPTION_PRE_INITIATION_AND_P<br>ROMOTER_OPENING                        | -1.5386645 | 0.00921659 | 8.66E-02 | 1     |
| WILCOX_RESPONSE_TO_PROGE<br>STERONE UP                                                               | -1.591328  | 0.00934579 | 6.70E-02 | 1     |
| REACTOME_TCA_CYCLE_AND_RE<br>SPIRATORY_ELECTRON_TRANSP<br>ORT                                        | -1.5579816 | 0.00934579 | 7.93E-02 | 1     |
| GO_B_CELL_RECEPTOR_SIGNALI<br>NG_PATHWAY                                                             | -1.5168726 | 0.00943396 | 9.64E-02 | 1     |
| DELPUECH_FOXO3_TARGETS_DN                                                                            | -1.5797195 | 0.00947867 | 7.13E-02 | 1     |
| REACTOME_HOMOLOGOUS_REC<br>OMBINATION_REPAIR_OF_REPLIC<br>ATION_INDEPENDENT_DOUBLE_S<br>TRAND_BREAKS | -1.8584013 | 0.00949367 | 1.42E-02 | 0.974 |
| GO_HISTONE_EXCHANGE                                                                                  | -1.8009359 | 0.00956938 | 2.10E-02 | 0.997 |
| GO_V_D_J_RECOMBINATION                                                                               | -1.7426318 | 0.00958466 | 2.91E-02 | 1     |
| GO_REGULATION_OF_SYNAPSE_<br>ASSEMBLY                                                                | -1.4845363 | 0.00985222 | 1.14E-01 | 1     |
| BILANGES_RAPAMYCIN_SENSITIV<br>E VIA TSC1 AND TSC2                                                   | -1.4116298 | 0.00995025 | 1.58E-01 | 1     |
| REACTOME_PHOSPHORYLATION_<br>OF THE APC C                                                            | -1.7976208 | 0.00996678 | 2.14E-02 | 0.997 |
| REACTOME_APC_CDC20_MEDIAT<br>ED_DEGRADATION_OF_NEK2A                                                 | -1.8882422 | 0.01027397 | 1.16E-02 | 0.946 |
| GO_TRANSLATION_FACTOR_ACTI<br>VITY_RNA_BINDING                                                       | -1.4559885 | 0.0106383  | 1.30E-01 | 1     |
| GO_MULTIVESICULAR_BODY                                                                               | -1.6001804 | 0.01149425 | 6.46E-02 | 1     |
| CHICAS_RB1_TARGETS_LOW_SE<br>RUM                                                                     | -1.4341288 | 0.01156069 | 1.42E-01 | 1     |
| BIOCARTA_PROTEASOME_PATH<br>WAY                                                                      | -1.6891288 | 0.01162791 | 3.95E-02 | 1     |

|                                                                                                                                       |            |            |          |       |
|---------------------------------------------------------------------------------------------------------------------------------------|------------|------------|----------|-------|
| GO_SKIN_EPIDERMIS_DEVELOPMENT                                                                                                         | -1.5128475 | 0.01176471 | 9.86E-02 | 1     |
| GO_ENDONUCLEASE_ACTIVITY_ACTIVE_WITH_EITHER_RIBO_OR_DEOXYRIBONUCLEIC_ACIDS_AND_PRODUCING_5_PHOSPHOMONESTERS                           | -1.6165828 | 0.01190476 | 5.98E-02 | 1     |
| JIANG_AGING_CEREBRAL_CORTICAL_UP                                                                                                      | -1.606705  | 0.012      | 6.29E-02 | 1     |
| LY_AGING_PREMATURE_DN                                                                                                                 | -1.6339211 | 0.01209677 | 5.47E-02 | 1     |
| TOMLINS_PROSTATE_CANCER_UP                                                                                                            | -1.5971503 | 0.01209677 | 6.56E-02 | 1     |
| SHETH_LIVER_CANCER_VS_TXNIP_LOSS_PAM5                                                                                                 | -1.5309055 | 0.01219512 | 9.01E-02 | 1     |
| GCNP_SHH_UP_EARLY.V1_UP                                                                                                               | -1.332443  | 0.01234568 | 2.15E-01 | 1     |
| PID_ATR_PATHWAY                                                                                                                       | -1.7109572 | 0.01244813 | 3.44E-02 | 1     |
| GO_OXIDOREDUCTASE_ACTIVITY_ACTING_ON_NAD_P_H_QUINONE_OR_SIMILAR_COMPOUND_AS_ACCEPTOR                                                  | -1.6786853 | 0.01265823 | 4.18E-02 | 1     |
| BLALOCK_ALZHEIMERS_DISEASE_INCIPIENT_DN                                                                                               | -1.3391049 | 0.01265823 | 2.09E-01 | 1     |
| REACTOME_PACKAGING_OF_TELOMERE_ENDS                                                                                                   | -1.6887952 | 0.01282051 | 3.95E-02 | 1     |
| GO_CENTRIOLE_ASSEMBLY                                                                                                                 | -1.8513018 | 0.01290323 | 1.49E-02 | 0.979 |
| GO_RNA_3_END_PROCESSING                                                                                                               | -1.4574914 | 0.01324503 | 1.29E-01 | 1     |
| GO_PYRIMIDINE_NUCLEOTIDE_METABOLIC_PROCESS                                                                                            | -1.4471751 | 0.01327434 | 1.34E-01 | 1     |
| GO_U1_SNRNP                                                                                                                           | -1.7845634 | 0.01328904 | 2.32E-02 | 1     |
| FERRANDO_T_ALL_WITH_MLL_ENL_FUSION_DN                                                                                                 | -1.5230465 | 0.01342282 | 9.38E-02 | 1     |
| REACTOME_DEADENYLATION_DEPENDENT_MRNA_DECAY                                                                                           | -1.5359267 | 0.01363636 | 8.75E-02 | 1     |
| GO_NEURON_PROJECTION_GUIDANCE                                                                                                         | -1.3092182 | 0.01369863 | 2.35E-01 | 1     |
| REACTOME_INHIBITION_OF_THE_PROTEOLYTIC_ACTIVITY_OF_APC_C_REQUIRED_FOR_THE_ONSET_OF_ANAPHASE_BY_MITOTIC_SPINDLER_CHECKPOINT_COMPONENTS | -1.7150029 | 0.01374571 | 3.38E-02 | 1     |
| GO_HORMONE_ACTIVITY                                                                                                                   | -1.4687891 | 0.0137931  | 1.22E-01 | 1     |
| GO_CALCIIUM_DEPENDENT_CELL_CELL_ADHESION_VIA_PLASMA_MEMBRANE_CELL_ADHESION_MOLECULES                                                  | -1.7117805 | 0.01423488 | 3.42E-02 | 1     |
| GO_SPINAL_CORD_PATTERNING                                                                                                             | -1.6716913 | 0.01433692 | 4.38E-02 | 1     |

|                                                                                                              |            |            |          |   |
|--------------------------------------------------------------------------------------------------------------|------------|------------|----------|---|
| GO_MATURATION_OF_5_8S_RRNA                                                                                   | -1.7735958 | 0.01454546 | 2.47E-02 | 1 |
| GO_MEMBRANE_DISASSEMBLY                                                                                      | -1.5473466 | 0.01463415 | 8.30E-02 | 1 |
| GO_PROTEIN_LOCALIZATION_TO_CILIUM                                                                            | -1.6110787 | 0.01470588 | 6.17E-02 | 1 |
| REACTOME_CYTOSOLIC_TRNA_AMINOACYLATION                                                                       | -1.7414663 | 0.01481482 | 2.92E-02 | 1 |
| GO_EXORIBONUCLEASE_ACTIVITY                                                                                  | -1.7107351 | 0.01503759 | 3.43E-02 | 1 |
| REACTOME_LATE_PHASE_OF_HIV_LIFE_CYCLE                                                                        | -1.6346027 | 0.01503759 | 5.45E-02 | 1 |
| SANSOM_APC_TARGETS_REQUIRE_MYC                                                                               | -1.3088795 | 0.01515152 | 2.35E-01 | 1 |
| SHEPARD_BMYB_TARGETS                                                                                         | -1.5621214 | 0.01530612 | 7.78E-02 | 1 |
| REACTOME_BASE_EXCISION_REPAIR                                                                                | -1.7465373 | 0.0154321  | 2.88E-02 | 1 |
| CHESLER_BRAIN_HIGHEST_EXPRESSION                                                                             | -1.602554  | 0.01568628 | 6.40E-02 | 1 |
| VANASSE_BCL2_TARGETS_DN                                                                                      | -1.4763668 | 0.01595745 | 1.18E-01 | 1 |
| GO_DNA_REPLICATION_INITIATION                                                                                | -1.7659826 | 0.01612903 | 2.58E-02 | 1 |
| GO_REGULATION_OF_TELOMERE_MAINTENANCE                                                                        | -1.5342103 | 0.01621622 | 8.84E-02 | 1 |
| REACTOME_NEP_NS2_INTERACTS_WITH_THE_CELLULAR_EXPORT_MACHINERY                                                | -1.595465  | 0.01639344 | 6.56E-02 | 1 |
| GO_EXONUCLEASE_ACTIVITY                                                                                      | -1.5376558 | 0.01657459 | 8.68E-02 | 1 |
| GO_NUCLEAR_REPLICATION_FOR_K                                                                                 | -1.6066426 | 0.01659751 | 6.28E-02 | 1 |
| GO_MITOCHONDRIAL_ELECTRON_TRANSPORT_CYTOCHROME_C_TO_OXYGEN                                                   | -1.7472405 | 0.01683502 | 2.88E-02 | 1 |
| GO_EXONUCLEASE_ACTIVITY_ACTIVE_WITH_EITHER_RIBO_OR_DEOXYRIBONUCLEIC_ACIDS_AND_PRODUCING_5_PHOSPHOMONONESTERS | -1.571208  | 0.01731602 | 7.44E-02 | 1 |
| GO_MICROTUBULE_ORGANIZING_CENTER_ORGANIZATION                                                                | -1.5596461 | 0.01744186 | 7.87E-02 | 1 |
| NADERI_BREAST_CANCER_PROGNOSIS_UP                                                                            | -1.5698159 | 0.01762115 | 7.46E-02 | 1 |
| GO_NONMOTILE_PRIMARY_CILIUM                                                                                  | -1.3418198 | 0.01785714 | 2.07E-01 | 1 |
| WIERENGA_PML_INTERACTOME                                                                                     | -1.5186665 | 0.01793722 | 9.56E-02 | 1 |
| BOHN_PRIMARY_IMMUNODEFICIENCY_SYNDROME_UP                                                                    | -1.4931945 | 0.01801802 | 1.08E-01 | 1 |
| GO_DAMAGED_DNA_BINDING                                                                                       | -1.4507017 | 0.01807229 | 1.33E-01 | 1 |

|                                                                                       |            |            |          |   |
|---------------------------------------------------------------------------------------|------------|------------|----------|---|
| PID_MYC_ACTIV_PATHWAY                                                                 | -1.401974  | 0.01818182 | 1.65E-01 | 1 |
| GO_DNA_DAMAGE_RESPONSE_DETECTION_OF_DNA_DAMAGE                                        | -1.6603605 | 0.01843318 | 4.68E-02 | 1 |
| GO_MISMATCH_REPAIR                                                                    | -1.5473778 | 0.01879699 | 8.31E-02 | 1 |
| CERIBELLI_PROMOTERS_INACTIVE_AND_BOUND_BY_NFY                                         | -1.5398315 | 0.01879699 | 8.61E-02 | 1 |
| GO_RNA_MODIFICATION                                                                   | -1.4281529 | 0.01935484 | 1.46E-01 | 1 |
| OXFORD_RALA_OR_RALB_TARGETS_UP                                                        | -1.4816161 | 0.01992032 | 1.15E-01 | 1 |
| GO_IMMUNOGLOBULIN_PRODUCTION_INVOLVED_IN_IMMUNOGLOBULIN_MEDIATED_IMMUNE_RESPONSE      | -1.6715218 | 0.02       | 4.37E-02 | 1 |
| GO_ISOTYPE_SWITCHING                                                                  | -1.6105287 | 0.02027027 | 6.18E-02 | 1 |
| GO_NEURON_FATE_SPECIFICATION                                                          | -1.5085973 | 0.02027027 | 1.01E-01 | 1 |
| REACTOME_TRANSCRIPTION_COUPLED_NER_TC_NER                                             | -1.5738555 | 0.02030457 | 7.36E-02 | 1 |
| HEPATIC_PROGENITOR                                                                    | -1.5099139 | 0.02040816 | 1.00E-01 | 1 |
| REACTOME_RESOLUTION_OF_AP_SITES_VIA_THE_MULTIPLE_NUCLEOTIDE_PATCH_REPLACEMENT_PATHWAY | -1.7368655 | 0.02047782 | 3.02E-02 | 1 |
| GO_MICROTUBULE_ORGANIZING_CENTER_PART                                                 | -1.3845533 | 0.02054795 | 1.75E-01 | 1 |
| GO_OLFACTORY_LOBE_DEVELOPMENT                                                         | -1.4369361 | 0.0209205  | 1.40E-01 | 1 |
| UDAYAKUMAR_MED1_TARGETS_UP                                                            | -1.307864  | 0.02105263 | 2.36E-01 | 1 |
| MARIADASON_RESPONSE_TO_BUTYRATE_SULINDAC_6                                            | -1.4459574 | 0.02150538 | 1.35E-01 | 1 |
| GO_SPERMATID_DIFFERENTIATION                                                          | -1.3971882 | 0.02158273 | 1.68E-01 | 1 |
| GO_REGULATION_OF_DNA_RECOMBINATION                                                    | -1.4628823 | 0.02162162 | 1.26E-01 | 1 |
| GO_IMMUNOGLOBULIN_PRODUCTION                                                          | -1.570048  | 0.02164502 | 7.48E-02 | 1 |
| GO_CELLULAR_AMINO_ACID_CATABOLIC_PROCESS                                              | -1.4242573 | 0.02173913 | 1.49E-01 | 1 |
| GO_REGULATION_OF_ERAD_PATHWAY                                                         | -1.6007837 | 0.02197802 | 6.45E-02 | 1 |
| GO_NUCLEAR_TRANSCRIBED_MRNA_CATABOLIC_PROCESS_DEADENYLATION_DEPENDENT_DECAY           | -1.43747   | 0.02209945 | 1.40E-01 | 1 |
| GO_HUMORAL_IMMUNE_RESPONSE_MEDIATED_BY_CIRCULATING_IMMUNOGLOBULIN                     | -1.6035368 | 0.02212389 | 6.38E-02 | 1 |

|                                                                              |            |            |          |   |
|------------------------------------------------------------------------------|------------|------------|----------|---|
| GO_GLUTATHIONE_DERIVATIVE_METABOLIC_PROCESS                                  | -1.5003326 | 0.02230483 | 1.05E-01 | 1 |
| BIOCARTA_ATRBRCA_PATHWAY                                                     | -1.5490835 | 0.02238806 | 8.25E-02 | 1 |
| GO_CAJAL_BODY                                                                | -1.4851065 | 0.02252252 | 1.14E-01 | 1 |
| GO_SOMATIC_DIVERSIFICATION_OF_IMMUNOGLOBULINS_INVOLVED_IN_IMMUNE_RESPONSE    | -1.6230067 | 0.02302632 | 5.78E-02 | 1 |
| GO_RNA_HELICASE_ACTIVITY                                                     | -1.395313  | 0.02312139 | 1.69E-01 | 1 |
| HALLMARK_SPERMATOGENESIS                                                     | -1.3694566 | 0.02325581 | 1.85E-01 | 1 |
| GO_NEGATIVE_REGULATION_OF_DNA_REPLICATION                                    | -1.5116819 | 0.02358491 | 9.93E-02 | 1 |
| GO_POSITIVE_REGULATION_OF_TELOMERE_MAINTENANCE                               | -1.573075  | 0.02369668 | 7.37E-02 | 1 |
| REACTOME_LAGGING_STRAND_SYNTHESIS                                            | -1.6578051 | 0.02405498 | 4.76E-02 | 1 |
| PENG_RAPAMYCIN_RESPONSE_DONOR                                                | -1.3464465 | 0.02439024 | 2.04E-01 | 1 |
| GO_CELL_CYCLE_PHASE_TRANSITION                                               | -1.1795657 | 0.02439024 | 3.84E-01 | 1 |
| GO_PRESPLICEOSOME                                                            | -1.5732418 | 0.02473498 | 7.38E-02 | 1 |
| GO_90S_PRERIBOSOME                                                           | -1.5689874 | 0.02508961 | 7.49E-02 | 1 |
| GO_POSITIVE_REGULATION_OF_B_CELL_ACTIVATION                                  | -1.4414095 | 0.02515723 | 1.38E-01 | 1 |
| PYEON_CANCER_HEAD_AND_NECK_VS_CERVICAL_UP                                    | -1.3341932 | 0.02531646 | 2.14E-01 | 1 |
| GO_NUCLEAR_ENVELOPE_DISSASSEMBLY                                             | -1.5406373 | 0.02538071 | 8.59E-02 | 1 |
| GO_DNA_DEPENDENT_DNA_REPLICATION_MAINTENANCE_OF_FIDELITY                     | -1.5583193 | 0.02545455 | 7.93E-02 | 1 |
| GO_ANTIGEN_BINDING                                                           | -1.5950246 | 0.0257732  | 6.57E-02 | 1 |
| GO_BASAL_TRANSCRIPTION_MACHINERY_BINDING                                     | -1.6497563 | 0.02614379 | 4.96E-02 | 1 |
| GO_PYRIMIDINE_NUCLEOSIDE_TRIPHOSPHATE_BIOSYNTHETIC_PROCESS                   | -1.5233319 | 0.02693603 | 9.38E-02 | 1 |
| GO_CHROMATIN_REMODELING                                                      | -1.3772113 | 0.02702703 | 1.80E-01 | 1 |
| GO_SOMATIC_RECOMBINATION_OF_IMMUNOGLOBULIN_GENES_INVOLVED_IN_IMMUNE_RESPONSE | -1.6198385 | 0.02711864 | 5.89E-02 | 1 |
| BURTON_ADIPOGENESIS_12                                                       | -1.6282399 | 0.02734375 | 5.61E-02 | 1 |
| GO_GERM_CELL_NUCLEUS                                                         | -1.6519185 | 0.02749141 | 4.90E-02 | 1 |
| SAKAI_TUMOR_INFILTRATING_MONOCYTES_DN                                        | -1.4335731 | 0.02777778 | 1.42E-01 | 1 |
| KLEIN_TARGETS_OF_BCR_ABL1_FUSION                                             | -1.5116177 | 0.02857143 | 9.92E-02 | 1 |



|                                                                                                 |            |            |          |   |
|-------------------------------------------------------------------------------------------------|------------|------------|----------|---|
| REACTOME_MITOTIC_G1_G1_S_P<br>HASES                                                             | -1.3731928 | 0.02857143 | 1.83E-01 | 1 |
| OLSSON_E2F3_TARGETS_DN                                                                          | -1.3553704 | 0.02870813 | 1.98E-01 | 1 |
| GO_MATURATION_OF_5_8S_RRNA<br>FROM_TRICISTRONIC_RRNA_TRANSCRIPT_S<br>SU_RRNA_5_8S_RRNA_LSU_RRNA | -1.6577519 | 0.02903226 | 4.75E-02 | 1 |
| GO_REGULATION_OF_DOUBLE_STRAND<br>BREAK_REPAIR_VIA_HOMOLOGOUS<br>RECOMBINATION                  | -1.6570141 | 0.02922078 | 4.76E-02 | 1 |
| GO_VENTRAL_SPINAL_CORD_DEVELOPMENT                                                              | -1.5535465 | 0.02985075 | 8.12E-02 | 1 |
| GO_TELOMERE_ORGANIZATION                                                                        | -1.4035859 | 0.02985075 | 1.64E-01 | 1 |
| GEORGES_CELL_CYCLE_MIR192_TARGETS                                                               | -1.4481798 | 0.02994012 | 1.34E-01 | 1 |
| GO_REGULATION_OF_ALTERNATIVE<br>MRNA_SPLICING_VIA_SPLICEOSOME                                   | -1.5962416 | 0.03007519 | 6.57E-02 | 1 |
| GO_REGULATION_OF_SISTER_CHROMATID<br>SEGREGATION                                                | -1.5741618 | 0.03030303 | 7.36E-02 | 1 |
| GO_SNRNA_METABOLIC_PROCESSES                                                                    | -1.4396904 | 0.03144654 | 1.39E-01 | 1 |
| GO_RESPONSE_TO_MANGANESE_ION                                                                    | -1.5362523 | 0.03180212 | 8.75E-02 | 1 |
| REACTOME_TRANSPORT_OF_RIBONUCLEOPROTEINS_INTO_THE_HOST<br>NUCLEUS                               | -1.5082093 | 0.03212851 | 1.01E-01 | 1 |
| GO_EXOSOME_RNASE_COMPLEX                                                                        | -1.6631304 | 0.03215434 | 4.59E-02 | 1 |
| GO_REGULATION_OF_BEHAVIOR                                                                       | -1.3741935 | 0.03225806 | 1.83E-01 | 1 |
| REACTOME_MITOTIC_G2_G2_M_P<br>HASES                                                             | -1.4492315 | 0.03311258 | 1.33E-01 | 1 |
| LEE_LIVER_CANCER_MYC_UP                                                                         | -1.4183037 | 0.03317536 | 1.53E-01 | 1 |
| GO_U4_U6_X_U5_TRISNRNP_COMPLEX                                                                  | -1.5600528 | 0.03358209 | 7.87E-02 | 1 |
| XU_HGF_TARGETS_INDUCED_BY_AKT1<br>48HR_DN                                                       | -1.5023828 | 0.03374233 | 1.04E-01 | 1 |
| PID_PLK1_PATHWAY                                                                                | -1.4822922 | 0.03389831 | 1.15E-01 | 1 |
| MATZUK_MEIOTIC_AND_DNA_REPAIR                                                                   | -1.5445474 | 0.03463204 | 8.41E-02 | 1 |
| GO_LUNG_CELL_DIFFERENTIATION                                                                    | -1.5213184 | 0.03496504 | 9.43E-02 | 1 |
| REACTOME_ORC1_REMOVAL_FROM<br>CHROMATIN                                                         | -1.3747956 | 0.03508772 | 1.82E-01 | 1 |
| GO_B_CELL_PROLIFERATION                                                                         | -1.4923117 | 0.03636364 | 1.09E-01 | 1 |
| REACTOME_MRNA_CAPPING                                                                           | -1.5426228 | 0.03663004 | 8.50E-02 | 1 |
| KRAS.KIDNEY_UP.V1_UP                                                                            | -1.2614777 | 0.03703704 | 2.84E-01 | 1 |

|                                                             |            |            |          |   |
|-------------------------------------------------------------|------------|------------|----------|---|
| GO_PROTEIN_ACTIVATION_CASCADE                               | -1.3949065 | 0.0372093  | 1.69E-01 | 1 |
| KEGG_PROTEIN_EXPORT                                         | -1.5827727 | 0.03745318 | 7.02E-02 | 1 |
| SCIBETTA_KDM5B_TARGETS_DN                                   | -1.4144465 | 0.03773585 | 1.56E-01 | 1 |
| GO_RNA_PHOSPHODIESTER_BOND_HYDROLYSIS_ENDONUCLEOLYTIC       | -1.4708605 | 0.03862661 | 1.21E-01 | 1 |
| REACTOME_NUCLEOTIDE_EXCISION_REPAIR                         | -1.4770533 | 0.03883495 | 1.18E-01 | 1 |
| GO_U2_SNRNP                                                 | -1.5380908 | 0.03928572 | 8.67E-02 | 1 |
| GO_TRANSCRIPTION_ELONGATION_FROM_RNA_POLYMERASE_II_PROMOTER | -1.322195  | 0.03947368 | 2.25E-01 | 1 |
| LE_NEURONAL_DIFFERENTIATION_DN                              | -1.4985704 | 0.03956835 | 1.05E-01 | 1 |
| GO_BRANCHED_CHAIN_AMINO_ACID_METABOLIC_PROCESS              | -1.5200753 | 0.03968254 | 9.49E-02 | 1 |
| HOLLEMAN_VINCRIStINE_RESISTANCE_ALL_DN                      | -1.5495657 | 0.03971119 | 8.27E-02 | 1 |
| GO_REPLISOME                                                | -1.5010208 | 0.03985507 | 1.05E-01 | 1 |
| MORI_PLASMA_CELL_DN                                         | -1.4236596 | 0.04032258 | 1.49E-01 | 1 |
| PASQUALUCCI_LYMPHOMA_BY_GC_STAGE_DN                         | -1.2786298 | 0.04040404 | 2.64E-01 | 1 |
| GO_NUCLEOSOMAL_DNA_BINDING                                  | -1.5000571 | 0.04104478 | 1.05E-01 | 1 |
| REACTOME_INTERACTIONS_OF_VPR_WITH_HOST_CELLULAR_PROTEINS    | -1.5471061 | 0.04166667 | 8.28E-02 | 1 |
| GO_RNA_POLYMERASE_III_ACTIVITY                              | -1.5225624 | 0.04210527 | 9.39E-02 | 1 |
| HESS_TARGETS_OF_HOXA9_AND_MEIS1_UP                          | -1.4385979 | 0.04210527 | 1.40E-01 | 1 |
| GO_PYRIMIDINE_NUCLEOSIDE_TRIPHOSPHATE_METABOLIC_PROCESS     | -1.4673487 | 0.04225352 | 1.23E-01 | 1 |
| REACTOME_AUTODEGRADATION_OF_CDH1_BY_CDH1_APC_C              | -1.3901728 | 0.04255319 | 1.71E-01 | 1 |
| GO_NUCLEAR_PORE                                             | -1.378746  | 0.04301075 | 1.79E-01 | 1 |
| GO_HAIR_CYCLE                                               | -1.3189003 | 0.04320988 | 2.28E-01 | 1 |
| GO_SYNAPSIS                                                 | -1.5579076 | 0.04347826 | 7.92E-02 | 1 |
| GO_NEURON_RECOGNITION                                       | -1.4955689 | 0.0438247  | 1.07E-01 | 1 |
| GO_METHYLTRANSFERASE_COMPLEX                                | -1.4193972 | 0.0448718  | 1.53E-01 | 1 |
| GO_NUCLEOTIDE_EXCISION_REPAIR_DNA_GAP_FILLING               | -1.4772662 | 0.0449827  | 1.18E-01 | 1 |
| RAY_TUMORIGENESIS_BY_ERBB2_CDC25A_UP                        | -1.3264045 | 0.04666667 | 2.21E-01 | 1 |

|                                                                |            |            |          |   |
|----------------------------------------------------------------|------------|------------|----------|---|
| REACTOME_ASSEMBLY_OF_THE_PRE_REPLICATIVE_COMPLEX               | -1.3540207 | 0.04678363 | 1.99E-01 | 1 |
| GO_G1_S_TRANSITION_OF_MITOTIC_CELL_CYCLE                       | -1.2594984 | 0.046875   | 2.87E-01 | 1 |
| YAO_TEMPORAL_RESPONSE_TO_PROGESTERONE_CLUSTER_13               | -1.2854557 | 0.04705882 | 2.58E-01 | 1 |
| MIKKELSEN_IPS_HCP_WITH_H3_UNMETHYLATED                         | -1.392396  | 0.04712042 | 1.70E-01 | 1 |
| GO_MALE_MEIOSIS                                                | -1.4627385 | 0.04744526 | 1.26E-01 | 1 |
| GO_POSITIVE_REGULATION_OF_CHROMOSOME_ORGANIZATION              | -1.3106426 | 0.04761905 | 2.34E-01 | 1 |
| BIOCARTA_CYTOKINE_PATHWAY                                      | -1.5217724 | 0.04823151 | 9.42E-02 | 1 |
| ASGHARZADEH_NEUROBLASTOMA_POOR_SURVIVAL_DN                     | -1.3848034 | 0.04867257 | 1.75E-01 | 1 |
| GO_PROTEIN_MONOUBIQUITINATION                                  | -1.2987188 | 0.04878049 | 2.46E-01 | 1 |
| POOLA_INVASIVE_BREAST_CANCER_UP                                | -1.1918898 | 0.04878049 | 3.69E-01 | 1 |
| CAHOY_NEURONAL                                                 | -1.3465466 | 0.04964539 | 2.04E-01 | 1 |
| NAM_FXYD5_TARGETS_DN                                           | -1.5141219 | 0.05016723 | 9.80E-02 | 1 |
| ACEVEDO_LIVER_CANCER_WITH_H3K9ME3_DN                           | -1.342819  | 0.05063291 | 2.07E-01 | 1 |
| GO_DNA_DIRECTED_RNA_POLYMERASE_III_COMPLEX                     | -1.5006427 | 0.05102041 | 1.05E-01 | 1 |
| PTEN_DN.V1_UP                                                  | -1.2630323 | 0.05154639 | 2.82E-01 | 1 |
| GO_GLUTATHIONE_DERIVATIVE_BIOSYNTHETIC_PROCESS                 | -1.4784817 | 0.0515873  | 1.17E-01 | 1 |
| GO_RNA_LOCALIZATION                                            | -1.2478216 | 0.05194805 | 2.99E-01 | 1 |
| NIKOLSKY_BREAST_CANCER_8Q12_Q22_AMPLICON                       | -1.2801629 | 0.05263158 | 2.63E-01 | 1 |
| GO_REGULATION_OF_TELOMERE_MAINTENANCE_VIA_TELOMERE_LENGTHENING | -1.3865511 | 0.0531401  | 1.74E-01 | 1 |
| SEIDEN_MET_SIGNALING                                           | -1.473615  | 0.05369128 | 1.19E-01 | 1 |
| GO_DETECTION_OF_VISIBLE_LIGHT                                  | -1.4052031 | 0.05394191 | 1.63E-01 | 1 |
| GO_CHROMOSOME_LOCALIZATION                                     | -1.3482525 | 0.05418719 | 2.03E-01 | 1 |
| GO_SPINDLE_MICROTUBULE                                         | -1.3975441 | 0.05434782 | 1.68E-01 | 1 |
| GO_PROTEIN_K11_LINKED_UBIQUITINATION                           | -1.5622038 | 0.05439331 | 7.79E-02 | 1 |
| GO_PEPTIDYL_PROLINE_MODIFICATION                               | -1.3666801 | 0.05445544 | 1.87E-01 | 1 |
| SU_TESTIS                                                      | -1.2883044 | 0.05454546 | 2.56E-01 | 1 |
| GO_CELLULAR_RESPONSE_TO_DURUG                                  | -1.3408655 | 0.05464481 | 2.08E-01 | 1 |

|                                                                   |            |            |          |   |
|-------------------------------------------------------------------|------------|------------|----------|---|
| VERHAAK_GLIOMASTOMA_NEURAL                                        | -1.2892107 | 0.05511811 | 2.55E-01 | 1 |
| YANG_BREAST_CANCER_ESR1_LASER_DN                                  | -1.3510641 | 0.05633803 | 2.01E-01 | 1 |
| GO_ENDORIBONUCLEASE_ACTIVITY                                      | -1.397844  | 0.05645161 | 1.68E-01 | 1 |
| GO_NEGATIVE_REGULATION_OF_CELL_DIVISION                           | -1.3474007 | 0.05681818 | 2.03E-01 | 1 |
| GO_DNA_DIRECTED_DNA_POLYMERASE_ACTIVITY                           | -1.4977137 | 0.0569395  | 1.06E-01 | 1 |
| GO_ANTIMICROBIAL_HUMORAL_RESPONSE                                 | -1.3910719 | 0.05701754 | 1.71E-01 | 1 |
| WANG_TARGETS_OF_MLL_CBP_FUSION_DN                                 | -1.343607  | 0.05714286 | 2.06E-01 | 1 |
| GO_CELLULAR_KETONE_METABOLIC_PROCESS                              | -1.3480316 | 0.05759163 | 2.03E-01 | 1 |
| BHATTACHARYA_EMBRYONIC_STEM_CELL                                  | -1.3174825 | 0.05921053 | 2.28E-01 | 1 |
| BROWN_MYELOID_CELL_DEVELOPMENT_DN                                 | -1.2967713 | 0.05932203 | 2.47E-01 | 1 |
| CHIARADONNA_NEOPLASTIC_TRANSFORMATION_KRAS_UP                     | -1.2474384 | 0.05932203 | 2.99E-01 | 1 |
| GO_POSITIVE_REGULATION_OF_SYNAPSE_ASSEMBLY                        | -1.3834146 | 0.05940594 | 1.76E-01 | 1 |
| BENPORATH_MYC_TARGETS_WITH_EBOX                                   | -1.2012868 | 0.06       | 3.56E-01 | 1 |
| SHIN_B_CELL_LYMPHOMA_CLUSTER_9                                    | -1.4817147 | 0.06040268 | 1.15E-01 | 1 |
| GO_RNA_METHYLATION                                                | -1.3671961 | 0.0608365  | 1.87E-01 | 1 |
| HU_ANGIOGENESIS_DN                                                | -1.4381076 | 0.06086956 | 1.40E-01 | 1 |
| GO_ORGAN_OR_TISSUE_SPECIFIC_IMMUNE_RESPONSE                       | -1.4104801 | 0.06101695 | 1.59E-01 | 1 |
| GO_MITOTIC_SPINDLE_ORGANIZATION                                   | -1.3281705 | 0.06122449 | 2.19E-01 | 1 |
| GO_PANCREAS_DEVELOPMENT                                           | -1.311245  | 0.06122449 | 2.34E-01 | 1 |
| GO_REGULATION_OF_POSTSYNAPTIC_MEMBRANE_POTENTIAL                  | -1.3597802 | 0.06153846 | 1.93E-01 | 1 |
| GO_DNA_LIGATION                                                   | -1.4759152 | 0.06164384 | 1.18E-01 | 1 |
| THILLAINADESAN_ZNF217_TARGETS_UP                                  | -1.3501378 | 0.0625     | 2.02E-01 | 1 |
| GO_HYDROLASE_ACTIVITY_HYDROLYZING_N_GLYCOSYL_COMPOUNDS            | -1.518386  | 0.06382979 | 9.56E-02 | 1 |
| REACTOME_RECRUITMENT_OF_MITOTIC_CENTROSOME_PROTEINS_AND_COMPLEXES | -1.3419831 | 0.06467662 | 2.07E-01 | 1 |
| GO_MOTILE_CILIUM                                                  | -1.2767179 | 0.06508876 | 2.66E-01 | 1 |

|                                                               |            |            |          |   |
|---------------------------------------------------------------|------------|------------|----------|---|
| GO_REGULATION_OF_CHROMOSOME_ORGANIZATION                      | -1.1745024 | 0.06521739 | 3.92E-01 | 1 |
| RICKMAN_METASTASIS_UP                                         | -1.2166455 | 0.06666667 | 3.37E-01 | 1 |
| GO_POSITIVE_REGULATION_OF_HISTONE_METHYLATION                 | -1.3968234 | 0.06837607 | 1.68E-01 | 1 |
| GO_POLYSOME                                                   | -1.3773779 | 0.06844106 | 1.80E-01 | 1 |
| GO_CELL_DIFFERENTIATION_IN_SPINAL_CORD                        | -1.4293485 | 0.06880734 | 1.45E-01 | 1 |
| KIM_MYC_AMPLIFICATION_TARGETS_UP                              | -1.1896331 | 0.06896552 | 3.72E-01 | 1 |
| DEN_INTERACT_WITH_LCA5                                        | -1.4507197 | 0.06976745 | 1.33E-01 | 1 |
| WATANABE_COLON_CANCER_MS1_VS_MSS_UP                           | -1.4068868 | 0.06993007 | 1.61E-01 | 1 |
| GO_MRNA_3_END_PROCESSING                                      | -1.3618478 | 0.07109005 | 1.92E-01 | 1 |
| GO_PHOTORECEPTOR_CELL_MAINTENANCE                             | -1.3927852 | 0.07142858 | 1.71E-01 | 1 |
| KEGG_PARKINSONS_DISEASE                                       | -1.2563382 | 0.07216495 | 2.90E-01 | 1 |
| GO_NEGATIVE_REGULATION_OF_NUCLEAR_DIVISION                    | -1.386031  | 0.07228915 | 1.75E-01 | 1 |
| GO_NEGATIVE_REGULATION_OF_DNA_METABOLIC_PROCESS               | -1.2456104 | 0.07246377 | 3.01E-01 | 1 |
| CHIANG_LIVER_CANCER_SUBCLASS_POLYSOMY7_DN                     | -1.4037734 | 0.07272727 | 1.64E-01 | 1 |
| PEART_HDAC_PROLIFERATION_CLUSTER_DN                           | -1.3154389 | 0.0738255  | 2.30E-01 | 1 |
| GO_BRANCHING_INVOLVED_IN_SALIVARY_GLAND_MORPHOGENESIS         | -1.4538124 | 0.07420494 | 1.31E-01 | 1 |
| GO_B_CELL_MEDIATED_IMMUNITY                                   | -1.3171362 | 0.07453416 | 2.29E-01 | 1 |
| REACTOME_NEUROTRANSMITTER_RELEASE_CYCLE                       | -1.3451447 | 0.0746888  | 2.05E-01 | 1 |
| GO_POSITIVE_REGULATION_OF_SYNAPTIC_TRANSMISSION_GLUTAMATERGIC | -1.4500048 | 0.07490636 | 1.33E-01 | 1 |
| GO_PEPTIDYL_Glutamic_Acid_MODIFICATION                        | -1.4436859 | 0.07508533 | 1.37E-01 | 1 |
| ZHAN_V1_LATE_DIFFERENTIATION_GENES_DN                         | -1.4523404 | 0.07615894 | 1.32E-01 | 1 |
| GO_POSITIVE_REGULATION_OF_CHROMOSOME_SEGREGATION              | -1.3909271 | 0.07630522 | 1.71E-01 | 1 |
| NIKOLSKY_BREAST_CANCER_6P24_P22_AMPLICON                      | -1.3873389 | 0.07720588 | 1.74E-01 | 1 |
| ZHAN_MULTIPLE_MYELOMA_MF_DN                                   | -1.3801899 | 0.07786885 | 1.78E-01 | 1 |
| LEE_LIVER_CANCER_CIPROFIBRATE_DN                              | -1.3024135 | 0.078125   | 2.43E-01 | 1 |

|                                                                         |            |            |          |   |
|-------------------------------------------------------------------------|------------|------------|----------|---|
| SAKAI_CHRONIC_HEPATITIS_VS_LIVER_CANCER_UP                              | -1.300389  | 0.07831325 | 2.44E-01 | 1 |
| REACTOME_LOSS_OF_NLP_FROM_MITOTIC_CENTROSOMES                           | -1.3338022 | 0.07834102 | 2.14E-01 | 1 |
| GO_RIBONUCLEOSIDE_BISPHOSPHATE_BIOSYNTHETIC_PROCESS                     | -1.418091  | 0.07911392 | 1.53E-01 | 1 |
| GO_DNA_SYNTHESIS_INVOLVED_IN_DNA_REPAIR                                 | -1.3021743 | 0.07913669 | 2.43E-01 | 1 |
| GO_NEURON_MIGRATION                                                     | -1.2433003 | 0.07913669 | 3.03E-01 | 1 |
| GO_AEROBIC_RESPIRATION                                                  | -1.3235652 | 0.07936508 | 2.24E-01 | 1 |
| GO_VOLTAGE_GATED_SODIUM_CHANNEL_ACTIVITY                                | -1.4331435 | 0.0797546  | 1.42E-01 | 1 |
| GO_SENSORY_PERCEPTION_OF_TASTE                                          | -1.3518701 | 0.08032128 | 2.01E-01 | 1 |
| ERB2_UP.V1_DN                                                           | -1.2959286 | 0.08045977 | 2.48E-01 | 1 |
| GO_DIENCEPHALON_DEVELOPMENT                                             | -1.2860699 | 0.08092485 | 2.58E-01 | 1 |
| GO_REGULATION_OF_B_CELL_ACTIVATION                                      | -1.2373558 | 0.08130081 | 3.11E-01 | 1 |
| STANELLE_E2F1_TARGETS                                                   | -1.3621016 | 0.08139535 | 1.92E-01 | 1 |
| GO_DNA_TEMPLATED_TRANSCRIPTION_ELONGATION                               | -1.2486005 | 0.08148148 | 2.98E-01 | 1 |
| REACTOME_RNA_POL_II_PRE_TRANSCRIPTION_EVENTS                            | -1.2880859 | 0.08152174 | 2.56E-01 | 1 |
| GO_COENZYME_A_METABOLIC_PROCESS                                         | -1.398796  | 0.08304498 | 1.67E-01 | 1 |
| GO_COMPLEMENT_ACTIVATION                                                | -1.3513943 | 0.08333334 | 2.01E-01 | 1 |
| ZHENG_GLIOMASTOMA_PLASTICITY_UP                                         | -1.1571931 | 0.08333334 | 4.19E-01 | 1 |
| GO_POSITIVE_REGULATION_OF_TELOMERE_MAINTENANCE_VIA_TELOMERE_LENGTHENING | -1.3910216 | 0.08366534 | 1.71E-01 | 1 |
| PARK_HSC_VS_MULTIPOTENT_PROGENITORS_UP                                  | -1.4524789 | 0.08387097 | 1.32E-01 | 1 |
| GO_NUCLEOSIDE_BISPHOSPHATE_BIOSYNTHETIC_PROCESS                         | -1.3956486 | 0.08561644 | 1.69E-01 | 1 |
| REACTOME_INWARDLY_RECTIFYING_K_CHANNELS                                 | -1.3318027 | 0.08679245 | 2.16E-01 | 1 |
| GO_CHROMATIN_DISASSEMBLY                                                | -1.3748493 | 0.08710802 | 1.83E-01 | 1 |
| GO_DNA_REPLICATION_DEPENDENT_NUCLEOSOME_ASSEMBLY                        | -1.3404833 | 0.088      | 2.08E-01 | 1 |
| GO_NUCLEAR_HETEROCHROMATIN                                              | -1.319102  | 0.08812261 | 2.28E-01 | 1 |
| REACTOME_INCRETIN_SECRETION_AND_INACTIVATION                            | -1.3650488 | 0.08813559 | 1.89E-01 | 1 |

|                                                                     |            |            |          |   |
|---------------------------------------------------------------------|------------|------------|----------|---|
| GO_NUCLEOSOME_BINDING                                               | -1.3054857 | 0.0883721  | 2.39E-01 | 1 |
| GO_MOLTING_CYCLE                                                    | -1.2853345 | 0.08854166 | 2.58E-01 | 1 |
| CAFFAREL_RESPONSE_TO_THC_24HR_5_UP                                  | -1.3259611 | 0.09053498 | 2.21E-01 | 1 |
| MILI_PSEUDOPODIA                                                    | -1.3368745 | 0.09055118 | 2.12E-01 | 1 |
| GO_CELL_CYCLE_G1_S_PHASE_TRANSITION                                 | -1.2462476 | 0.09090909 | 3.01E-01 | 1 |
| SHIPP_DLCL_VS_FOLLICULAR_LYMPHOMA_UP                                | -1.3208766 | 0.0913242  | 2.26E-01 | 1 |
| GO_NEGATIVE_REGULATION_OF_CALCIIUM_ION_TRANSPORT_INTO_CYTOSOL       | -1.3955891 | 0.09174312 | 1.69E-01 | 1 |
| HUANG_DASATINIB_RESISTANCE_DN                                       | -1.275171  | 0.09326425 | 2.68E-01 | 1 |
| GO_RNA_METHYLTRANSFERASE_ACTIVITY                                   | -1.4345658 | 0.09407666 | 1.41E-01 | 1 |
| GO_CARBON_OXYGEN_LYASE_ACTIVITY                                     | -1.2594213 | 0.09433962 | 2.87E-01 | 1 |
| REACTOME_CONVERSION_FROM_APC_C_CDC20_TO_APC_C_CDH1_IN_LATE_ANAPHASE | -1.3714381 | 0.09507042 | 1.84E-01 | 1 |
| GOLDRATH_HOMEOSTATIC_PROLIFERATION                                  | -1.2041252 | 0.0952381  | 3.53E-01 | 1 |
| MATZUK_SPERMATOCYTE                                                 | -1.2535042 | 0.09550562 | 2.93E-01 | 1 |
| GO_CILIUM_MOVEMENT                                                  | -1.385117  | 0.09655172 | 1.75E-01 | 1 |
| GO_DNA_MODIFICATION                                                 | -1.3056432 | 0.0972973  | 2.39E-01 | 1 |
| REACTOME_CDT1_ASSOCIATION_WITH_THE_CDC6_ORC_ORIGIN_COMPLEX          | -1.280208  | 0.09756097 | 2.63E-01 | 1 |
| GO_PURINE_NUCLEOSIDE_BISPHOSPHATE_BIOSYNTHETIC_PROCESS              | -1.3924593 | 0.09824561 | 1.71E-01 | 1 |
| GO_POSITIVE_REGULATION_OF_DENDRITE_EXTENSION                        | -1.3735167 | 0.0990099  | 1.83E-01 | 1 |
| GO_DNA_DIRECTED_RNA_POLYMERASE_II_HOLOENZYME                        | -1.2528152 | 0.09937888 | 2.94E-01 | 1 |
| AIYAR_COBRA1_TARGETS_DN                                             | -1.3198481 | 0.09964413 | 2.27E-01 | 1 |
| GO_MRNA_SPLICE_SITE_SELECTION                                       | -1.3538637 | 0.09966777 | 1.99E-01 | 1 |
| GO_RNA_POLYMERASE_ACTIVITY                                          | -1.3313712 | 0.10043668 | 2.16E-01 | 1 |
| GO_PYRIMIDINE_CONTAINING_COMPOUND_METABOLIC_PROCESSES               | -1.272888  | 0.10106383 | 2.70E-01 | 1 |

|                                                                                        |            |            |          |   |
|----------------------------------------------------------------------------------------|------------|------------|----------|---|
| GO_CALCIIUM_INDEPENDENT_CELL_CELL_ADHESION_VIA_PLASMA_MEMBRANE_CELL_ADHESION_MOLECULES | -1.3609642 | 0.1013986  | 1.92E-01 | 1 |
| GO_PHOSPHOLIPASE_C_ACTIVATING_G_PROTEIN_COUPLED_RECEPTOR_SIGNALING_PATHWAY             | -1.226695  | 0.10191083 | 3.23E-01 | 1 |
| REACTOME_RNA_POL_I_PROMOTER_OPENING                                                    | -1.3179281 | 0.10212766 | 2.28E-01 | 1 |
| GO_METAPHASE_PLATE_CONGRESSION                                                         | -1.2995827 | 0.10222222 | 2.45E-01 | 1 |
| GO_DRUG_BINDING                                                                        | -1.2139888 | 0.10344828 | 3.41E-01 | 1 |
| REACTOME_GABA_SYNTHESIS_RELEASE_REUPTAKE_AND_DEGRADATION                               | -1.3738211 | 0.10365854 | 1.83E-01 | 1 |
| KEGG_CELL_CYCLE                                                                        | -1.2135953 | 0.10465116 | 3.41E-01 | 1 |
| EPPERT_CE_HSC_LSC                                                                      | -1.2813723 | 0.10526316 | 2.62E-01 | 1 |
| REACTOME_INTERACTION_BETWEEN_L1_AND_ANKYRINS                                           | -1.3119848 | 0.10891089 | 2.34E-01 | 1 |
| REACTOME_DESTABILIZATION_OF_MRNA_BY_KSRP                                               | -1.3345528 | 0.11042945 | 2.14E-01 | 1 |
| TONKS_TARGETS_OF_RUNX1_RUNX1T1_FUSION_GRANULOCYTE_UP                                   | -1.2548198 | 0.11059908 | 2.91E-01 | 1 |
| PID_LKB1_PATHWAY                                                                       | -1.2771109 | 0.1106383  | 2.66E-01 | 1 |
| GO_PROTEIN_DNA_COMPLEX_DISSASSEMBLY                                                    | -1.3704312 | 0.11111111 | 1.85E-01 | 1 |
| GO_GLUTATHIONE_TRANSFERASE_ACTIVITY                                                    | -1.3477501 | 0.11111111 | 2.03E-01 | 1 |
| GO_CHROMATIN_ORGANIZATION                                                              | -1.0732228 | 0.11111111 | 5.46E-01 | 1 |
| GO_HSP70_PROTEIN_BINDING                                                               | -1.3098658 | 0.11155379 | 2.35E-01 | 1 |
| GO_NUCLEOTIDE_EXCISION_REPAIR_DNA_INCISION                                             | -1.2905139 | 0.11160714 | 2.54E-01 | 1 |
| FURUKAWA_DUSP6_TARGETS_PC135_DN                                                        | -1.2500829 | 0.11170213 | 2.97E-01 | 1 |
| BRCA1_DN.V1_UP                                                                         | -1.177504  | 0.1118421  | 3.88E-01 | 1 |
| KEGG_BUTANOATE_METABOLISM                                                              | -1.2925092 | 0.1119403  | 2.52E-01 | 1 |
| GO_RESPONSE_TO_TESTOSTERONE                                                            | -1.2903711 | 0.11297071 | 2.54E-01 | 1 |
| GO_EMBRYONIC_SKELETAL_SYSTEM_MORPHOGENESIS                                             | -1.1841149 | 0.11464968 | 3.78E-01 | 1 |
| GO_STRUCTURE_SPECIFIC_DNA_BINDING                                                      | -1.197035  | 0.1147541  | 3.62E-01 | 1 |
| GO_DNA_CATABOLIC_PROCESS_ENDONUCLEOLYTIC                                               | -1.358289  | 0.11486486 | 1.95E-01 | 1 |



|                                                         |            |            |          |   |
|---------------------------------------------------------|------------|------------|----------|---|
| GO_ENDOTHELIAL_CELL_PROLIFERATION                       | -1.3180658 | 0.116      | 2.28E-01 | 1 |
| BCAT.100_UP.V1_DN                                       | -1.2971637 | 0.11740891 | 2.47E-01 | 1 |
| LIU_BREAST_CANCER                                       | -1.3471552 | 0.11787073 | 2.03E-01 | 1 |
| GO_CILIARY_PLASM                                        | -1.2202982 | 0.11864407 | 3.32E-01 | 1 |
| REACTOME_HIV_INFECTION                                  | -1.1552583 | 0.11864407 | 4.22E-01 | 1 |
| GO_REGULATION_OF_DENDRITE_EXTENSION                     | -1.3818034 | 0.11904762 | 1.77E-01 | 1 |
| RAHMAN_TP53_TARGETS_PHOSPHORYLATED                      | -1.3109118 | 0.11904762 | 2.34E-01 | 1 |
| GO_DNA_REPLICATION_DEPENDENT_NUCLEOSOME_ORGANIZATION    | -1.32284   | 0.11923077 | 2.25E-01 | 1 |
| ZHANG_RESPONSE_TO_IKK_INHIBITOR_AND_TNF_DN              | -1.1951374 | 0.12142857 | 3.64E-01 | 1 |
| FOURNIER_ACINAR_DEVELOPMENT_LATE_DN                     | -1.3801913 | 0.12195122 | 1.78E-01 | 1 |
| CREIGHTON_ENDOCRINE_THERAPY_RESISTANCE_2                | -1.1084946 | 0.12195122 | 4.93E-01 | 1 |
| GO_PTERIDINE_CONTAINING_COMPOUND_BIOSYNTHETIC_PROCESSES | -1.3154033 | 0.12292359 | 2.30E-01 | 1 |
| GO_NEGATIVE_REGULATION_OF_DNA_RECOMBINATION             | -1.3330874 | 0.12297735 | 2.15E-01 | 1 |
| REACTOME_MYOGENESIS                                     | -1.3145155 | 0.12323944 | 2.31E-01 | 1 |
| KEGG_METABOLISM_OF_XENOBIOTICS_BY_CYTOCHROME_P450       | -1.2687683 | 0.12328767 | 2.75E-01 | 1 |
| GO_ALPHA_AMINO_ACID_CATABOLIC_PROCESS                   | -1.209075  | 0.12337662 | 3.46E-01 | 1 |
| GO_CELL_DIVISION                                        | -1.1035384 | 0.125      | 5.00E-01 | 1 |
| CUI_TCF21_TARGETS_2_UP                                  | -1.081537  | 0.125      | 5.34E-01 | 1 |
| REACTOME_P53_INDEPENDENT_G1_S_DNA_DAMAGE_CHECKPOINT     | -1.2325534 | 0.12631579 | 3.17E-01 | 1 |
| YEGNASUBRAMANIAN_PROSTATE_CANCER                        | -1.1836319 | 0.12804878 | 3.79E-01 | 1 |
| GO_CRANIAL_NERVE_MORPHOGENESIS                          | -1.315363  | 0.12847222 | 2.30E-01 | 1 |
| GO_STRUCTURAL_CONSTITUENT_OF_CYTOSKELETON               | -1.1950402 | 0.12883435 | 3.64E-01 | 1 |
| GO_NUCLEOSOME_DISASSEMBLY                               | -1.3486159 | 0.13057324 | 2.03E-01 | 1 |
| GO_ACETYL_COA_METABOLIC_PROCESS                         | -1.2824647 | 0.13284133 | 2.61E-01 | 1 |
| GO_METHIONINE_METABOLIC_PROCESS                         | -1.2718259 | 0.13356164 | 2.71E-01 | 1 |

|                                                                      |            |            |          |   |
|----------------------------------------------------------------------|------------|------------|----------|---|
| REN_ALVEOLAR_RHABDOMYOSARCOMA_UP                                     | -1.1984165 | 0.13605443 | 3.60E-01 | 1 |
| SCHAEFFER_SOX9_TARGETS_IN_PROSTATE_DEVELOPMENT_DN                    | -1.2445546 | 0.13679245 | 3.02E-01 | 1 |
| POMEROY_MEDULLOBLASTOMA_PROGNOSIS_DN                                 | -1.2090977 | 0.13744076 | 3.47E-01 | 1 |
| VANHARANTA_UTERINE_FIBROID_WITH_7Q_DELETION_UP                       | -1.2278167 | 0.13772455 | 3.22E-01 | 1 |
| GO_REGULATION_OF_CENTROSOME_CYCLE                                    | -1.2292689 | 0.13793103 | 3.20E-01 | 1 |
| KEGG_PROPYANOATE_METABOLISM                                          | -1.2215664 | 0.1388889  | 3.31E-01 | 1 |
| SANSOM_WNT_PATHWAY_REQUIRE_MYC                                       | -1.2340572 | 0.13917525 | 3.15E-01 | 1 |
| GO_PRODUCTION_OF_MOLECULAR_MEDIATOR_OF_IMMUNE_RESPONSE               | -1.2320992 | 0.13917525 | 3.17E-01 | 1 |
| ACEVEDO_LIVER_CANCER_WITH_H3K27ME3_DN                                | -1.1732906 | 0.1392405  | 3.93E-01 | 1 |
| GO_GLYCOSYL_COMPOUND_BIOSYNTHETIC_PROCESS                            | -1.150605  | 0.13934426 | 4.28E-01 | 1 |
| WHITEHURST_PACLITAXEL_SENSITIVITY                                    | -1.241544  | 0.1402715  | 3.06E-01 | 1 |
| GO_REGULATION_OF_NEUROTRANSMITTER_RECEPTOR_ACTIVITY                  | -1.2823702 | 0.14056225 | 2.61E-01 | 1 |
| GO_NCRNA_3_END_PROCESSING                                            | -1.301343  | 0.14067279 | 2.43E-01 | 1 |
| GO_REGULATION_OF_DOUBLESTRAND_BREAK_REPAIR                           | -1.2314726 | 0.14112903 | 3.18E-01 | 1 |
| GO_ESTABLISHMENT_OF_PROTEIN_LOCALIZATION_TO_ORGANELLE                | -1.1188602 | 0.14285715 | 4.79E-01 | 1 |
| REACTOME_REGULATION_OF_GLYCOKINASE_BY_GLYCOKINASE_REGULATORY_PROTEIN | -1.240673  | 0.1440678  | 3.06E-01 | 1 |
| MATZUK_SPERMATID_DIFFERENTIATION                                     | -1.2592034 | 0.14453125 | 2.86E-01 | 1 |
| GO_SINGLE_FERTILIZATION                                              | -1.1878685 | 0.1452514  | 3.74E-01 | 1 |
| STK33_SKM_DN                                                         | -1.133802  | 0.14754099 | 4.57E-01 | 1 |
| GO_RIBONUCLEOPROTEIN_COMPLEX_BINDING                                 | -1.172841  | 0.14814815 | 3.94E-01 | 1 |
| GO_CILIARY_TIP                                                       | -1.2435888 | 0.14847161 | 3.03E-01 | 1 |
| GO_VENTRICULAR_SYSTEM_DEVELOPMENT                                    | -1.281766  | 0.15       | 2.62E-01 | 1 |
| GO_NEGATIVE_REGULATION_OF_CHROMOSOME_ORGANIZATION                    | -1.1774138 | 0.15189873 | 3.87E-01 | 1 |

|                                                                              |            |            |          |   |
|------------------------------------------------------------------------------|------------|------------|----------|---|
| GO_REGULATION_OF_HISTONE_METHYLATION                                         | -1.1892782 | 0.15350877 | 3.73E-01 | 1 |
| GO_REGULATION_OF_MESONEPHROS DEVELOPMENT                                     | -1.2911941 | 0.15498155 | 2.54E-01 | 1 |
| GO_REGULATION_OF_DNA_REPAIR                                                  | -1.2015529 | 0.1552795  | 3.56E-01 | 1 |
| GO_NUCLEOSIDE_BISPHOSPHATE METABOLIC PROCESS                                 | -1.2309308 | 0.1563786  | 3.18E-01 | 1 |
| GO_PHOSPHATIDYLETHANOLAMINE ACYL_CHAIN REMODELING                            | -1.249756  | 0.15646258 | 2.97E-01 | 1 |
| REACTOME_FORMATION_OF_TRANSCRIPTION_COUPLED_NER_TRANSCRIPTION REPAIR COMPLEX | -1.1958708 | 0.15730338 | 3.63E-01 | 1 |
| MEINHOLD_OVARIAN_CANCER_LOW GRADE DN                                         | -1.2975014 | 0.15789473 | 2.47E-01 | 1 |
| GO_CYTOCHROME_COMPLEX                                                        | -1.2857426 | 0.15789473 | 2.58E-01 | 1 |
| GO_TELOMERE_CAPPING                                                          | -1.2593443 | 0.15789473 | 2.87E-01 | 1 |
| HOFMANN_CELL_LYMPHOMA_UP                                                     | -1.176596  | 0.15789473 | 3.88E-01 | 1 |
| REACTOME_RNA_POL_I_TRANSCRIPTION                                             | -1.181465  | 0.15822785 | 3.82E-01 | 1 |
| GO_TELOMERIC_DNA_BINDING                                                     | -1.2897192 | 0.15830116 | 2.55E-01 | 1 |
| WANG_CISPLATIN_RESPONSE_AND XPC UP                                           | -1.1068401 | 0.15873016 | 4.96E-01 | 1 |
| GO_POSITIVE_REGULATION_OF_BEHAVIOR                                           | -1.2932593 | 0.15957446 | 2.51E-01 | 1 |
| GO_POSITIVE_REGULATION_OF_VASODILATION                                       | -1.2718946 | 0.15957446 | 2.71E-01 | 1 |
| OUILLETTE_CLL_13Q14_DELETION UP                                              | -1.2095835 | 0.15957446 | 3.46E-01 | 1 |
| GO_SITE_OF_DOUBLE_STRAND_BREAK                                               | -1.2462608 | 0.16049382 | 3.01E-01 | 1 |
| GO_EAR_MORPHOGENESIS                                                         | -1.1482973 | 0.16153847 | 4.32E-01 | 1 |
| GO_RETINA_LAYER_FORMATION                                                    | -1.2695998 | 0.1627907  | 2.74E-01 | 1 |
| GO_NEUROPEPTIDE_RECEPTOR_BINDING                                             | -1.2519169 | 0.16376306 | 2.95E-01 | 1 |
| PIGF_UP.V1_UP                                                                | -1.1245472 | 0.16393442 | 4.72E-01 | 1 |
| GO_ARGININE_METABOLIC_PROCESS                                                | -1.2742388 | 0.16498317 | 2.69E-01 | 1 |
| RB_P107_DN.V1_UP                                                             | -1.1158565 | 0.16504854 | 4.83E-01 | 1 |
| GO_B_CELL_ACTIVATION                                                         | -1.1138843 | 0.16528925 | 4.86E-01 | 1 |
| GO_ESTROUS_CYCLE                                                             | -1.2590401 | 0.16666667 | 2.86E-01 | 1 |
| GO_SODIUM_CHANNEL_ACTIVITY                                                   | -1.2299454 | 0.16666667 | 3.19E-01 | 1 |
| GO_HISTONE_MONOUBIQUITINATION                                                | -1.2137693 | 0.16666667 | 3.41E-01 | 1 |
| GO_PURINE_NUCLEOSIDE_BISPHOSPHATE METABOLIC PROCESS                          | -1.2190049 | 0.16731517 | 3.34E-01 | 1 |
| YU_BAP1_TARGETS                                                              | -1.2559124 | 0.16788322 | 2.90E-01 | 1 |

|                                                         |            |            |          |   |
|---------------------------------------------------------|------------|------------|----------|---|
| KEGG_INTESTINAL_IMMUNE_NETWORK_FOR_IGA_PRODUCTION       | -1.230974  | 0.16867469 | 3.18E-01 | 1 |
| GO_DEOXYRIBONUCLEOTIDE_METABOLIC_PROCESS                | -1.2018532 | 0.16949153 | 3.56E-01 | 1 |
| GO_FOREBRAIN_REGIONALIZATION                            | -1.2756974 | 0.16955018 | 2.68E-01 | 1 |
| GO_MEMBRANE_DEPOLARIZATION_DURING_ACTION_POTENTIAL      | -1.1966553 | 0.16956522 | 3.62E-01 | 1 |
| GO_TELOMERE_MAINTENANCE_VIA_TELOMERE_LENGTHENING        | -1.2889068 | 0.17142858 | 2.55E-01 | 1 |
| GO_LUNG_EPITHELIUM_DEVELOPMENT                          | -1.198548  | 0.17375886 | 3.61E-01 | 1 |
| RPS14_DN.V1_DN                                          | -1.1053482 | 0.175      | 4.98E-01 | 1 |
| WANG_METASTASIS_OF_BREAST_CANCER_ESR1_UP                | -1.2552948 | 0.17627119 | 2.91E-01 | 1 |
| CHIARETTI_T_ALL_RELAPSE_PROGNOSIS                       | -1.268843  | 0.17857143 | 2.75E-01 | 1 |
| BIOCARTA_DC_PATHWAY                                     | -1.2243811 | 0.17880794 | 3.27E-01 | 1 |
| GO_CATION_CHANNEL_COMPLEX                               | -1.1013784 | 0.17977528 | 5.04E-01 | 1 |
| MAYBURD_RESPONSE_TO_L6635_36_DN                         | -1.1871194 | 0.17989418 | 3.75E-01 | 1 |
| GO_SULFUR_AMINO_ACID_BIOSYNTHETIC_PROCESS               | -1.2360746 | 0.18037975 | 3.12E-01 | 1 |
| GO_PURINE_RIBONUCLEOSIDE_BIOSYNTHETIC_PROCESS           | -1.1458124 | 0.18115942 | 4.36E-01 | 1 |
| REACTOME_FORMATION_OF_THE_HIV1_EARLY_ELONGATION_COMPLEX | -1.2382227 | 0.18181819 | 3.10E-01 | 1 |
| GO_POSITIVE_REGULATION_OF_MICROTUBULE_POLYMERIZATION    | -1.2315824 | 0.1821192  | 3.18E-01 | 1 |
| GO_SPINAL_CORD_DEVELOPMENT                              | -1.1424718 | 0.18238993 | 4.42E-01 | 1 |
| GO_TRANSCRIPTION_FROM_RNA_POLYMERASE_III_PROMOTER       | -1.1722513 | 0.18502203 | 3.94E-01 | 1 |
| KOHOUTEK_CCNT2_TARGETS                                  | -1.1674256 | 0.18536586 | 4.01E-01 | 1 |
| MADAN_DPPA4_TARGETS                                     | -1.1850206 | 0.18604651 | 3.78E-01 | 1 |
| GO_INNER_EAR_MORPHOGENESIS                              | -1.1246853 | 0.1861702  | 4.72E-01 | 1 |
| GO_CILIARY_PART                                         | -1.0997825 | 0.18644068 | 5.06E-01 | 1 |
| GO_MITOTIC_SPINDLE_ASSEMBLY                             | -1.2334385 | 0.1870229  | 3.16E-01 | 1 |
| GO_HETEROTRIMERIC_G_PROTEIN_COMPLEX                     | -1.2111504 | 0.1875     | 3.44E-01 | 1 |
| GO_LRR_DOMAIN_BINDING                                   | -1.2125051 | 0.18770227 | 3.42E-01 | 1 |

|                                                                                                              |            |            |          |   |
|--------------------------------------------------------------------------------------------------------------|------------|------------|----------|---|
| GO_REGULATION_OF_SYNAPSE_ORGANIZATION                                                                        | -1.1222208 | 0.18796992 | 4.75E-01 | 1 |
| GO_PURINE_NUCLEOSIDE_BIOSYNTHETIC_PROCESS                                                                    | -1.1550453 | 0.18831168 | 4.22E-01 | 1 |
| CAIRO_PML_TARGETS_BOUND_BY_MYC_UP                                                                            | -1.2191031 | 0.18867925 | 3.34E-01 | 1 |
| GO_POSITIVE_REGULATION_OF_INTERLEUKIN_12_PRODUCTION                                                          | -1.2069753 | 0.18930042 | 3.50E-01 | 1 |
| GO_CRANIAL_NERVE_DEVELOPMENT                                                                                 | -1.1868885 | 0.18930042 | 3.75E-01 | 1 |
| GO_WNT_PROTEIN_BINDING                                                                                       | -1.1862004 | 0.19029851 | 3.76E-01 | 1 |
| KEGG_PORPHYRIN_AND_CHLOROPHYLL_METABOLISM                                                                    | -1.2206688 | 0.1904762  | 3.32E-01 | 1 |
| GO_RIBONUCLEOSIDE_BISPHOSPHATE_METABOLIC_PROCESS                                                             | -1.2179193 | 0.19087137 | 3.35E-01 | 1 |
| GO_ASPARTATE_FAMILY_AMINO_ACID_METABOLIC_PROCESS                                                             | -1.1743581 | 0.19282511 | 3.92E-01 | 1 |
| GO_NUCLEAR_NUCLEOSOME                                                                                        | -1.2022755 | 0.1954023  | 3.56E-01 | 1 |
| GO_RNA_DEPENDENT_DNA_BIOSYNTHETIC_PROCESS                                                                    | -1.2441095 | 0.19578314 | 3.03E-01 | 1 |
| GO_PHOTORECEPTOR_INNER_SEGMENT                                                                               | -1.179731  | 0.19767442 | 3.84E-01 | 1 |
| GO_AUTONOMIC_NERVOUS_SYSTEM_DEVELOPMENT                                                                      | -1.2045987 | 0.1977612  | 3.53E-01 | 1 |
| GOLUB_ALL_VS_AML_UP                                                                                          | -1.1886275 | 0.199262   | 3.73E-01 | 1 |
| CAFFAREL_RESPONSE_TO_THC_DN                                                                                  | -1.2177734 | 0.20068027 | 3.35E-01 | 1 |
| GO_REGULATION_OF_HISTONE_H3_K4_METHYLATION                                                                   | -1.202888  | 0.2016129  | 3.55E-01 | 1 |
| GO_REGULATION_OF_INTERLEUKIN_12_PRODUCTION                                                                   | -1.1638749 | 0.20192307 | 4.07E-01 | 1 |
| KEGG_ALLOGRAFT_REJECTION                                                                                     | -1.2182664 | 0.20198676 | 3.35E-01 | 1 |
| REACTOME_AUTODEGRADATION_OF_THE_E3_UBIQUITIN_LIGASE_COP1                                                     | -1.1534017 | 0.2021858  | 4.25E-01 | 1 |
| CHANG_CORE_SERUM_RESPONSE_UP                                                                                 | -1.1099166 | 0.2037037  | 4.91E-01 | 1 |
| GO_POSITIVE_REGULATION_OF_IMMUNOGLOBULIN_PRODUCTION                                                          | -1.1916399 | 0.20567375 | 3.69E-01 | 1 |
| GRABARCZYK_BCL11B_TARGETS_DN                                                                                 | -1.1198645 | 0.20588236 | 4.77E-01 | 1 |
| GO_REGULATION_OF_ALPHA_AMINO_3_HYDROXY_5_METHYL_4_ISOXAZOLE_PROPIONATE_SELECTIVE_GLUTAMATE_RECEPTOR_ACTIVITY | -1.2065399 | 0.20875421 | 3.50E-01 | 1 |
| GO_CHANNEL_REGULATOR_ACTIVITY                                                                                | -1.1104878 | 0.20952381 | 4.90E-01 | 1 |

|                                                              |            |            |          |   |
|--------------------------------------------------------------|------------|------------|----------|---|
| GO_ATP_DEPENDENT_DNA_HELICASE_ACTIVITY                       | -1.2103047 | 0.20987654 | 3.45E-01 | 1 |
| SCHLOSSER_MYC_AND_SERUM_RESPONSE_SYNERGY                     | -1.1888319 | 0.21008404 | 3.73E-01 | 1 |
| GO_CILIUM_MORPHOGENESIS                                      | -1.119992  | 0.21052632 | 4.77E-01 | 1 |
| GO_NEGATIVE_REGULATION_OF_OXIDOREDUCTASE_ACTIVITY            | -1.2066935 | 0.21071428 | 3.50E-01 | 1 |
| GO_CELL_DIFFERENTIATION_IN_HINDBRAIN                         | -1.1831567 | 0.2147651  | 3.79E-01 | 1 |
| DAIRKEE_CANCER_PRONE_RESPONSE_BPA_E2                         | -1.0962802 | 0.21495327 | 5.11E-01 | 1 |
| GO_NEGATIVE_REGULATION_OF_CELLULAR_PROTEIN_CATABOLIC_PROCESS | -1.1516849 | 0.21518987 | 4.26E-01 | 1 |
| JAK2_DN.V1_DN                                                | -1.1283243 | 0.21568628 | 4.67E-01 | 1 |
| PECE_MAMMARY_STEM_CELL_UP                                    | -1.0986737 | 0.21621622 | 5.07E-01 | 1 |
| BOSCO_EPITHELIAL_DIFFERENTIATION_MODULE                      | -1.1681541 | 0.21777777 | 4.00E-01 | 1 |
| DOANE_BREAST_CANCER_CLASSES_UP                               | -1.1281173 | 0.22033899 | 4.67E-01 | 1 |
| GO_ASTROCYTE_DEVELOPMENT                                     | -1.1758288 | 0.22142857 | 3.90E-01 | 1 |
| GO_MICROTUBULE_CYTOSKELETON_ORGANIZATION_INVOLVED_IN_MITOSIS | -1.1983503 | 0.22177419 | 3.60E-01 | 1 |
| GO_PYRIMIDINE_CONTAINING_COMPOUND_BIOSYNTHETIC_PROCESS       | -1.1812446 | 0.224      | 3.82E-01 | 1 |
| RIZ_ERYTHROID_DIFFERENTIATION_HBZ                            | -1.1585736 | 0.2243346  | 4.16E-01 | 1 |
| GO_DETECTION_OF_STIMULUS                                     | -1.0708933 | 0.22535211 | 5.48E-01 | 1 |
| GO_MULTICELLULAR_ORGANISM_AGING                              | -1.1610988 | 0.2260274  | 4.12E-01 | 1 |
| GO_AROMATIC_AMINO_ACID_FAMILY_CATABOLIC_PROCESS              | -1.1945115 | 0.2265861  | 3.64E-01 | 1 |
| REACTOME_SIGNAL_AMPLIFICATION                                | -1.1597512 | 0.22705314 | 4.15E-01 | 1 |
| GOLDRATH_ANTIGEN_RESPONSE                                    | -1.0559785 | 0.22727273 | 5.71E-01 | 1 |
| GO_DISULFIDE_OXIDOREDUCTASE_ACTIVITY                         | -1.1727718 | 0.23046875 | 3.94E-01 | 1 |
| GO_SYNAPTONEMAL_COMPLEX                                      | -1.1623802 | 0.23076923 | 4.10E-01 | 1 |
| GO_NEGATIVE_REGULATION_OF_RESPONSE_TO_OXIDATIVE_STRESS       | -1.1701728 | 0.23104693 | 3.97E-01 | 1 |
| GO_AXONEME_PART                                              | -1.2020729 | 0.23225807 | 3.56E-01 | 1 |

|                                                           |            |            |          |   |
|-----------------------------------------------------------|------------|------------|----------|---|
| KEGG_DRUG_METABOLISM_CYT<br>OCHROME_P450                  | -1.1481152 | 0.23255815 | 4.32E-01 | 1 |
| KEGG_CITRATE_CYCLE_TCA_CYCLE                              | -1.1849827 | 0.23357664 | 3.77E-01 | 1 |
| GO_CARBOXY_TERMINAL_DOMAIN<br>PROTEIN_KINASE_COMPLEX      | -1.169567  | 0.23404256 | 3.98E-01 | 1 |
| ROYLANCE_BREAST_CANCER_16<br>Q_COPY_NUMBER_DN             | -1.2023181 | 0.23426573 | 3.56E-01 | 1 |
| GO_INTRAMOLECULAR_OXIDORE<br>DUCTASE_ACTIVITY             | -1.1272378 | 0.23555556 | 4.68E-01 | 1 |
| JUBAN_TARGETS_OF_SPI1_AND_<br>FLI1_DN                     | -1.109546  | 0.2361111  | 4.92E-01 | 1 |
| REACTOME_ACYL_CHAIN_REMOD<br>ELLING_OF_PE                 | -1.1956306 | 0.23666666 | 3.64E-01 | 1 |
| SEIDEN_ONCOGENESIS_BY_MET                                 | -1.1126611 | 0.23837209 | 4.87E-01 | 1 |
| GO_DETECTION_OF ABIOTIC_STI<br>MULUS                      | -1.0846115 | 0.23846154 | 5.30E-01 | 1 |
| KEGG_PYRIMIDINE_METABOLISM                                | -1.0889374 | 0.23880596 | 5.22E-01 | 1 |
| GO_DNA_CATABOLIC_PROCESS                                  | -1.1504444 | 0.23970038 | 4.28E-01 | 1 |
| REACTOME_RNA_POL_III_TRANS<br>CRIPTION                    | -1.1300142 | 0.24       | 4.64E-01 | 1 |
| GO_EPIDERMIS_MORPHOGENESI<br>S                            | -1.1440196 | 0.24025974 | 4.39E-01 | 1 |
| GO_PURINE_NTP_DEPENDENT_H<br>ELICASE_ACTIVITY             | -1.0876482 | 0.24025974 | 5.24E-01 | 1 |
| SMID_BREAST_CANCER_RELAPS<br>E_IN_LUNG_UP                 | -1.1525908 | 0.24125874 | 4.25E-01 | 1 |
| KEGG_TYPE_I_DIABETES_MELLIT<br>US                         | -1.138089  | 0.24125874 | 4.51E-01 | 1 |
| MCCLUNG_DELTA_FOSB_TARGET<br>S_2WK                        | -1.1170623 | 0.2413793  | 4.81E-01 | 1 |
| YAO_TEMPORAL_RESPONSE_TO_<br>PROGESTERONE_CLUSTER_10      | -1.0950654 | 0.24277456 | 5.13E-01 | 1 |
| REACTOME_G_PROTEIN_ACTIVAT<br>ION                         | -1.1555699 | 0.24295774 | 4.22E-01 | 1 |
| SCHMIDT_POR_TARGETS_IN_LIM<br>B_BUD_UP                    | -1.1533753 | 0.24542125 | 4.24E-01 | 1 |
| REACTOME_SCF_BETA_TRCP_ME<br>DIATED_DEGRADATION_OF_EMI1   | -1.0914409 | 0.24615385 | 5.18E-01 | 1 |
| DARWICHE_PAPILLOMA_RISK_LO<br>W_UP                        | -1.0923343 | 0.24742268 | 5.17E-01 | 1 |
| GO_CELL_CELL_SIGNALING_INVO<br>LVED_IN_CARDIAC_CONDUCTION | -1.1703737 | 0.24809161 | 3.97E-01 | 1 |
| GO_NEURON_FATE_COMMITMEN<br>T                             | -1.1312457 | 0.25       | 4.62E-01 | 1 |

|                                                                                      |            |            |          |   |
|--------------------------------------------------------------------------------------|------------|------------|----------|---|
| ALCALAY_AML_BY_NPM1_LOCALIZATION_DN                                                  | -1.0615913 | 0.25       | 5.62E-01 | 1 |
| GO_CELLULAR_RESPONSE_TO_DNA_DAMAGE_STIMULUS                                          | -1.0322846 | 0.25       | 6.13E-01 | 1 |
| REACTOME_VIF_MEDIATED_DEGRADATION_OF_APOBEC3G                                        | -1.1468716 | 0.2513369  | 4.34E-01 | 1 |
| GO_ENDOCRINE_PANCREAS_DEVELOPMENT                                                    | -1.1345545 | 0.25221238 | 4.57E-01 | 1 |
| GO_EYE_PHOTORECEPTOR_CELL_DEVELOPMENT                                                | -1.135876  | 0.25291827 | 4.55E-01 | 1 |
| GO_PROTEASOME_ACCESSORY_COMPLEX                                                      | -1.1398861 | 0.25296444 | 4.47E-01 | 1 |
| KEGG_PRIMARY_IMMUNODEFICIENCY                                                        | -1.1306376 | 0.25431034 | 4.63E-01 | 1 |
| GO_NEGATIVE_REGULATION_OF_RESPONSE_TO_REACTIVE_OXYGEN_SPECIES                        | -1.1777835 | 0.25448027 | 3.87E-01 | 1 |
| GO_REGULATION_OF_CELLULAR_RESPONSE_TO_HEAT                                           | -1.1045414 | 0.25503355 | 4.99E-01 | 1 |
| GO_PROTEIN_TARGETING_TO_MEMBRANE                                                     | -1.0931817 | 0.25609756 | 5.16E-01 | 1 |
| GO_SPINDLE_ASSEMBLY                                                                  | -1.1114787 | 0.25663716 | 4.89E-01 | 1 |
| VANTVEER_BREAST_CANCER_POROSIS                                                       | -1.0994632 | 0.25757575 | 5.06E-01 | 1 |
| GO_DORSAL_VENTRAL_PATTERN_FORMATION                                                  | -1.120531  | 0.25882354 | 4.77E-01 | 1 |
| GO_PHAGOCYTOSIS_ENGULFMENT                                                           | -1.1256069 | 0.26007327 | 4.72E-01 | 1 |
| REACTOME_MEIOTIC_SYNAPSIS                                                            | -1.0929002 | 0.2606383  | 5.16E-01 | 1 |
| GO_POSITIVE_REGULATION_OF_DENDRITIC_SPINE_DEVELOPMENT                                | -1.1077926 | 0.26153848 | 4.94E-01 | 1 |
| KEGG_AUTOIMMUNE_THYROID_DISEASE                                                      | -1.1657292 | 0.26262626 | 4.04E-01 | 1 |
| KEGG_BASAL_TRANSCRIPTION_FACTORS                                                     | -1.1127809 | 0.26506025 | 4.87E-01 | 1 |
| GO_NEGATIVE_REGULATION_OF_NEURON_DEATH                                               | -1.0668917 | 0.26506025 | 5.53E-01 | 1 |
| GO_REGULATION_OF_INSULIN_SECRETION_INVOLVED_IN_CELLULAR_RESPONSE_TO_GLUCOSE_STIMULUS | -1.1204795 | 0.2652174  | 4.76E-01 | 1 |
| PID_TELOMERASE_PATHWAY                                                               | -1.1043336 | 0.2654321  | 4.99E-01 | 1 |
| GO_GAMMA_TUBULIN_BINDING                                                             | -1.1245176 | 0.26666668 | 4.72E-01 | 1 |
| GO_FOREBRAIN_NEURON_DEVELOPMENT                                                      | -1.1157439 | 0.2682927  | 4.83E-01 | 1 |
| GO_POSITIVE_REGULATION_OF_MESONEPHROS_DEVELOPMENT                                    | -1.1341197 | 0.2689655  | 4.58E-01 | 1 |



|                                                                                              |            |            |          |   |
|----------------------------------------------------------------------------------------------|------------|------------|----------|---|
| KIM_ALL_DISORDERS_OLIGODENDROCYTE_NUMBER_CORR_DN                                             | -1.1252719 | 0.2693727  | 4.72E-01 | 1 |
| GO_CILIUM_ORGANIZATION                                                                       | -1.081444  | 0.26966292 | 5.34E-01 | 1 |
| FURUKAWA_DUSP6_TARGETS_P<br>CI35_UP                                                          | -1.1254319 | 0.27027026 | 4.72E-01 | 1 |
| CHIANG_LIVER_CANCER_SUBCLASS<br>POLYSOMY7_UP                                                 | -1.1064022 | 0.2713568  | 4.96E-01 | 1 |
| GO_POSITIVE_REGULATION_OF_<br>DNA_BIOSYNTHETIC_PROCESS                                       | -1.0986385 | 0.27450982 | 5.07E-01 | 1 |
| GO_REGULATION_OF_DNA_REPLI<br>CATION                                                         | -1.0734365 | 0.2747253  | 5.46E-01 | 1 |
| SCHRAMM_INHBA_TARGETS_DN                                                                     | -1.1118188 | 0.27710843 | 4.89E-01 | 1 |
| GARGALOVIC_RESPONSE_TO_OX<br>IDIZED_PHOSPHOLIPIDS_GREEN_<br>UP                               | -1.1355056 | 0.27715355 | 4.56E-01 | 1 |
| GO_REGULATION_OF_TRANSCRI<br>PTION_INVOLVED_IN_G1_S_TRAN<br>SITION_OF_MITOTIC_CELL_CYCL<br>E | -1.1086245 | 0.28015563 | 4.93E-01 | 1 |
| GO_POSITIVE_REGULATION_OF_<br>RNA_SPLICING                                                   | -1.1476288 | 0.28064516 | 4.33E-01 | 1 |
| PID_FAS_PATHWAY                                                                              | -1.1001443 | 0.2825112  | 5.06E-01 | 1 |
| PLASARI_TGFB1_TARGETS_10HR<br>DN                                                             | -1.082687  | 0.28301886 | 5.32E-01 | 1 |
| GO_INTRINSIC_COMPONENT_OF_<br>MITOCHONDRIAL_MEMBRANE                                         | -1.0979735 | 0.2832618  | 5.08E-01 | 1 |
| GO_REGULATION_OF_RNA_SPLIC<br>ING                                                            | -1.0870955 | 0.2837838  | 5.25E-01 | 1 |
| GO_GTP_METABOLIC_PROCESS                                                                     | -1.1225789 | 0.28382838 | 4.74E-01 | 1 |
| CLIMENT_BREAST_CANCER_COPY<br>NUMBER_UP                                                      | -1.1212195 | 0.2847222  | 4.77E-01 | 1 |
| REACTOME_CDK_MEDIATED_PHO<br>SPHORYLATION_AND_REMOVAL_<br>OF_CDC6                            | -1.0934111 | 0.285      | 5.16E-01 | 1 |
| GO_MITOCHONDRION_ORGANIZA<br>TION                                                            | -1.0377748 | 0.2857143  | 6.04E-01 | 1 |
| GO_SERINE_TYPE_EXOPEPTIDAS<br>E_ACTIVITY                                                     | -1.122781  | 0.28673837 | 4.74E-01 | 1 |
| BASSO_B_LYMPHOCYTE_NETWORK                                                                   | -1.0611454 | 0.28703704 | 5.62E-01 | 1 |
| GO_NEGATIVE_REGULATION_OF_<br>ENDOTHELIAL_CELL_APOPTOTIC<br>PROCESS                          | -1.1211774 | 0.28723404 | 4.76E-01 | 1 |
| RODWELL_AGING_KIDNEY_DN                                                                      | -1.0691308 | 0.288      | 5.51E-01 | 1 |
| GO_POSITIVE_REGULATION_OF_<br>G_PROTEIN_COUPLED_RECEPTOR<br>PROTEIN_SIGNALING_PATHWAY        | -1.1338668 | 0.28903654 | 4.58E-01 | 1 |

|                                                                      |            |            |          |   |
|----------------------------------------------------------------------|------------|------------|----------|---|
| GO_PYRIMIDINE_NUCLEOTIDE_BIOSYNTHETIC_PROCESS                        | -1.0855682 | 0.28968254 | 5.28E-01 | 1 |
| REACTOME_INHIBITION_OF_INSULIN_SECRETION_BY_ADRENALINE_NORADRENALINE | -1.1535141 | 0.2901961  | 4.25E-01 | 1 |
| BANDRES_RESPONSE_TO_CARMUSTIN_WITHOUT_MGMT_48HR_DN                   | -1.1082565 | 0.2901961  | 4.93E-01 | 1 |
| RIZ_ERYTHROID_DIFFERENTIATION_6HR                                    | -1.1241846 | 0.29032257 | 4.72E-01 | 1 |
| GO_DEFENSE_RESPONSE_TOGRAM_POSITIVE_BACTERIUM                        | -1.0669751 | 0.29100528 | 5.54E-01 | 1 |
| FLOTHO_PEDIATRIC_ALL_THERAPY_RESPONSE_UP                             | -1.07557   | 0.29166666 | 5.42E-01 | 1 |
| GO_NEGATIVE_REGULATION_OF_CELLULAR_RESPONSE_TO_OXIDATIVE_STRESS      | -1.1186255 | 0.292      | 4.79E-01 | 1 |
| GO_ASPARTATE_FAMILY_AMINO_ACID_BIOSYNTHETIC_PROCESS                  | -1.1153512 | 0.29310346 | 4.83E-01 | 1 |
| GO_CELL_CYCLE_G2_M_PHASE_TRANSITION                                  | -1.0796574 | 0.2952381  | 5.36E-01 | 1 |
| GO_PHOTORECEPTOR_CELL_DEVELOPMENT                                    | -1.1002169 | 0.29535866 | 5.06E-01 | 1 |
| KORKOLA_EMBRYONIC_CARCINOMA_VS_SEMINOMA_DN                           | -1.1179568 | 0.29642856 | 4.80E-01 | 1 |
| GO_ICOSANOID_BIOSYNTHETIC_PROCESS                                    | -1.0899525 | 0.29803923 | 5.20E-01 | 1 |
| KEGG_FC_EPSILON_RI_SIGNALING_PATHWAY                                 | -1.0507901 | 0.2986111  | 5.80E-01 | 1 |
| GO_NCRNA_TRANSCRIPTION                                               | -1.0712917 | 0.2987013  | 5.48E-01 | 1 |
| GO_CYCLIN_DEPENDENT_PROTEIN_KINASE_ACTIVITY                          | -1.0925771 | 0.2996633  | 5.16E-01 | 1 |
| GO_ATRIAL_SEPTUM_DEVELOPMENT                                         | -1.133467  | 0.30033004 | 4.58E-01 | 1 |
| GO_SPERM_EGG_RECOGNITION                                             | -1.1044149 | 0.30081302 | 4.99E-01 | 1 |
| YANAGIHARA_ESX1_TARGETS                                              | -1.0828847 | 0.30252102 | 5.32E-01 | 1 |
| GO_FATTY_ACID_DERIVATIVE_BIOSYNTHETIC_PROCESS                        | -1.0985897 | 0.30357143 | 5.07E-01 | 1 |
| GO_EPITHELIAL_TUBE_BRANCHING_INVOLVED_IN_LUNG_MORPHOGENESIS          | -1.1160494 | 0.30402932 | 4.83E-01 | 1 |
| GAUSSMANN_MLL_AF4_FUSION_TARGETS_B_UP                                | -1.1110233 | 0.30491802 | 4.90E-01 | 1 |
| SHEPARD_BMYB_MORPHOLINO_DN                                           | -1.0676565 | 0.30588236 | 5.53E-01 | 1 |
| MIKKELSEN_MEF_ICP_WITH_H3K4ME3_AND_H3K27ME3                          | -1.0836494 | 0.30597016 | 5.31E-01 | 1 |

|                                                                 |            |            |          |   |
|-----------------------------------------------------------------|------------|------------|----------|---|
| ROVERSI_GLIOMA_LOH_REGIONS                                      | -1.0966063 | 0.3073593  | 5.10E-01 | 1 |
| GO_REGULATION_OF_TYROSINE_PHOSPHORYLATION_OF_STAT5_PROTEIN      | -1.1132603 | 0.30821916 | 4.87E-01 | 1 |
| FONTAINE_THYROID_TUMOR_UNCERTAIN_MALIGNANCY_DN                  | -1.0913008 | 0.31118882 | 5.18E-01 | 1 |
| GO_MODULATION_OF_EXCITATORY_POSTSYNAPTIC_POTENTIAL              | -1.1017275 | 0.31178707 | 5.03E-01 | 1 |
| BOYALT_LIVER_CANCER_SUBCLASS_G123_UP                            | -1.0756731 | 0.31188118 | 5.42E-01 | 1 |
| HORTON_SREBF_TARGETS                                            | -1.0891417 | 0.31226766 | 5.22E-01 | 1 |
| GO_OLIGODENDROCYTE_DEVELOPMENT                                  | -1.1149623 | 0.31300813 | 4.84E-01 | 1 |
| GARGALOVIC_RESPONSE_TO_OXIDIZED_PHOSPHOLIPIDS_TURQUOISE_DN      | -1.0944521 | 0.31553397 | 5.14E-01 | 1 |
| STEIN_ESRRA_TARGETS_RESPONSIVE_TO_ESTROGEN_DN                   | -1.088548  | 0.31627908 | 5.23E-01 | 1 |
| ABE_INNER_EAR                                                   | -1.0714223 | 0.31658292 | 5.48E-01 | 1 |
| GO_NUCLEOTIDE_EXCISION_REPAIR_PREINCISION_COMPLEX_ASSEMBLY      | -1.0759345 | 0.3181818  | 5.42E-01 | 1 |
| GO_NUCLEOTIDE_EXCISION_REPAIR_DNA_INCISION_3_TO_LESION          | -1.0676183 | 0.3205575  | 5.52E-01 | 1 |
| GO_REGULATION_OF_INTERFERON_GAMMA_BIOSYNTHETIC_PROCESS          | -1.1300055 | 0.32258064 | 4.64E-01 | 1 |
| GALE_APL_WITH_FLT3_MUTATED_UP                                   | -1.0784904 | 0.32286996 | 5.39E-01 | 1 |
| GO_REGULATION_OF_HEART_RATE_BY_CARDIAC_CONDUCTION               | -1.0817997 | 0.32307693 | 5.34E-01 | 1 |
| GO_ATPASE_REGULATOR_ACTIVITY                                    | -1.0836791 | 0.32352942 | 5.32E-01 | 1 |
| MIKKELSEN_IPS_ICP_WITH_H3K27ME3                                 | -1.0764242 | 0.3237705  | 5.42E-01 | 1 |
| GO_NUCLEOTIDE_EXCISION_REPAIR_PREINCISION_COMPLEX_STABILIZATION | -1.0715976 | 0.3252595  | 5.48E-01 | 1 |
| GO_DOUBLE_STRANDED_RNA_BINDING                                  | -1.0721166 | 0.3254717  | 5.48E-01 | 1 |
| GO_G2_DNA_DAMAGE_CHECKPOINT                                     | -1.082836  | 0.3269962  | 5.32E-01 | 1 |
| GO_HETEROCHROMATIN                                              | -1.0419325 | 0.32786885 | 5.97E-01 | 1 |
| GO_GERM_CELL_DEVELOPMENT                                        | -1.0377698 | 0.32876712 | 6.03E-01 | 1 |
| PAL_PRMT5_TARGETS_DN                                            | -1.080228  | 0.32936507 | 5.36E-01 | 1 |
| PEDERSEN_METASTASIS_BY_ERBB2_ISOFORM_6                          | -1.1026635 | 0.32962963 | 5.02E-01 | 1 |

|                                                          |            |            |          |   |
|----------------------------------------------------------|------------|------------|----------|---|
| MANTOVANI_VIRAL_GPCR_SIGNALING_DN                        | -1.0679493 | 0.3304721  | 5.53E-01 | 1 |
| GO_CALCIIUM_CHANNEL_COMPLEX                              | -1.0618638 | 0.33175355 | 5.63E-01 | 1 |
| GO_INTERSTRAND_CROSS_LINK_REPAIR                         | -1.0600208 | 0.3319672  | 5.63E-01 | 1 |
| GO_PYRIMIDINE_NUCLEOSIDE_BIOSYNTHETIC_PROCESS            | -1.0798897 | 0.3321033  | 5.36E-01 | 1 |
| GO_BICARBONATE_TRANSMEMBRANE_TRANSPORTER_ACTIVITY        | -1.1023428 | 0.33333334 | 5.02E-01 | 1 |
| GO_SPINDLE                                               | -1.036997  | 0.33333334 | 6.05E-01 | 1 |
| GO_ASTROCYTE_DIFFERENTIATION                             | -1.0625262 | 0.33636364 | 5.62E-01 | 1 |
| GO_RETINA_HOMEOSTASIS                                    | -1.0779706 | 0.3377193  | 5.39E-01 | 1 |
| GO_PRE_MRNA_BINDING                                      | -1.0617855 | 0.33870968 | 5.63E-01 | 1 |
| GO_BLOOD_COAGULATION_FIBRIN_CLOT_FORMATION               | -1.0773128 | 0.33887044 | 5.40E-01 | 1 |
| BIOCARTA_INFLAM_PATHWAY                                  | -1.0796827 | 0.34074074 | 5.36E-01 | 1 |
| NAKAMURA_TUMOR_ZONE_PERIPHERAL_VS_CENTRAL_UP             | -1.033252  | 0.3409091  | 6.13E-01 | 1 |
| RIZ_ERYTHROID_DIFFERENTIATION_HEMGN                      | -1.0692326 | 0.34181818 | 5.51E-01 | 1 |
| GO_DETECTION_OF_LIGHT_STIMULUS                           | -1.0859549 | 0.34313726 | 5.27E-01 | 1 |
| REACTOME_ADP_SIGNALING_THROUGH_P2RY1                     | -1.0935403 | 0.34412956 | 5.16E-01 | 1 |
| GO_S_ADENOSYLMETHIONINE_METABOLIC_PROCESS                | -1.0745722 | 0.3451613  | 5.44E-01 | 1 |
| MAGRANGEAS_MULTIPLE_MYELOMA_IGG_VS_IGA_DN                | -1.0615512 | 0.3456376  | 5.62E-01 | 1 |
| AUNG_GASTRIC_CANCER                                      | -1.0545398 | 0.3472222  | 5.73E-01 | 1 |
| GO_EYE_PHOTORECEPTOR_CELL_DIFFERENTIATION                | -1.0340751 | 0.3472222  | 6.12E-01 | 1 |
| WATANABE_COLON_CANCER_MSI_VS_MSS_DN                      | -1.0699055 | 0.3473054  | 5.50E-01 | 1 |
| GO_METALLOCARBOXYPEPTIDASE_ACTIVITY                      | -1.0697756 | 0.34732825 | 5.50E-01 | 1 |
| TURASHVILI_BREAST_LOBULAR_CARCINOMA_VS_LOBULAR_NORMAL_UP | -1.0348122 | 0.34751773 | 6.11E-01 | 1 |
| REACTOME_REGULATION_OF_SIGNALING_BY_CBL                  | -1.0730228 | 0.34962407 | 5.46E-01 | 1 |
| DORMOY_ELAVL1_TARGETS                                    | -1.0899981 | 0.35031846 | 5.21E-01 | 1 |
| GO_RETINA_MORPHOGENESIS_IN_CAMERA_TYPE_EYE               | -1.0757227 | 0.35080644 | 5.42E-01 | 1 |

|                                                                                |            |            |          |   |
|--------------------------------------------------------------------------------|------------|------------|----------|---|
| TURASHVILI_BREAST_LOBULAR_CARCINOMA_VS_DUCTAL_NORMAL_DN                        | -1.0479876 | 0.35211268 | 5.85E-01 | 1 |
| SHAFFER_IRF4_TARGETS_IN_ACTIVATED_DENDRITIC_CELL                               | -1.0419352 | 0.35403726 | 5.98E-01 | 1 |
| GO_POTASSIUM_ION_IMPORT                                                        | -1.0742489 | 0.35433072 | 5.44E-01 | 1 |
| REACTOME_PREFOLDIN_MEDIATED_TRANSFER_OF_SUBSTRATE_TO_CCTRIC                    | -1.0619487 | 0.3561644  | 5.63E-01 | 1 |
| TIEN_INTESTINE_PROBIOTICS_6HR_UP                                               | -1.0677681 | 0.3568075  | 5.53E-01 | 1 |
| GO_REGULATION_OF_TELOMERE_CAPPING                                              | -1.0761278 | 0.35689047 | 5.42E-01 | 1 |
| GO_NEUROMUSCULAR_PROCESS_CONTROLLING_BALANCE                                   | -1.0574732 | 0.35779816 | 5.69E-01 | 1 |
| GO_OVARIAN_FOLLICLE_DEVELOPMENT                                                | -1.0557708 | 0.36097562 | 5.71E-01 | 1 |
| TAKEDA_TARGETS_OF_NUP98_HOXA9_FUSION_6HR_UP                                    | -1.0597038 | 0.36196318 | 5.63E-01 | 1 |
| GO_GLOBAL_GENOME_NUCLEOTIDE_EXCISION_REPAIR                                    | -1.048931  | 0.36238533 | 5.83E-01 | 1 |
| FERRANDO_HOX11_NEIGHBORS                                                       | -1.0600986 | 0.36486486 | 5.63E-01 | 1 |
| GO_UBIQUITIN_LIKE_PROTEIN_CONJUGATING_ENZYME_ACTIVITY                          | -1.0713751 | 0.36619717 | 5.48E-01 | 1 |
| GO_HAIR_CELL_DIFFERENTIATION                                                   | -1.0612056 | 0.36637932 | 5.62E-01 | 1 |
| GO_RESPONSE_TO_LEPTIN                                                          | -1.0634279 | 0.36858973 | 5.61E-01 | 1 |
| GO_RESPONSE_TO_MUSCLE_ACTIVITY                                                 | -1.061597  | 0.36949152 | 5.63E-01 | 1 |
| GO_PROTEIN_EXPORT_FROM_NUCLEUS                                                 | -1.0532556 | 0.36981133 | 5.75E-01 | 1 |
| HOXA9_DN.V1_DN                                                                 | -1.0256933 | 0.37037036 | 6.24E-01 | 1 |
| GO_NUCLEAR_IMPORT                                                              | -1.0218811 | 0.37078652 | 6.31E-01 | 1 |
| GO_DNA_ALKYLATION                                                              | -1.0191491 | 0.37083334 | 6.34E-01 | 1 |
| GO_CHAPERONE_MEDIATED_PROTEIN_FOLDING                                          | -1.0307548 | 0.37155962 | 6.15E-01 | 1 |
| GO_REGULATION_OF_VASCULAR_ENDOTHELIAL_GROWTH_FACTOR_RECEPTOR_SIGNALING_PATHWAY | -1.0466015 | 0.37337664 | 5.88E-01 | 1 |
| OXFORD_RALA_OR_RALB_TARGETS_DN                                                 | -1.0301942 | 0.37380192 | 6.16E-01 | 1 |
| GO_ENDOCRINE_SYSTEM_DEVELOPMENT                                                | -1.0510491 | 0.37391305 | 5.80E-01 | 1 |
| PARK_HSC_AND_MULTIPOTENT_PROGENITORS                                           | -1.0627872 | 0.3744076  | 5.62E-01 | 1 |
| GO_CELL_FATE_SPECIFICATION                                                     | -1.0416437 | 0.375      | 5.97E-01 | 1 |

|                                                                                       |            |            |          |   |
|---------------------------------------------------------------------------------------|------------|------------|----------|---|
| SANA_RESPONSE_TO_IFNG_DN                                                              | -1.0312872 | 0.375      | 6.15E-01 | 1 |
| REACTOME_ANTIGEN_ACTIVATES_B_CELL_RECEPTOR_LEADING_TO_GENERATION_OF_SECOND_MESSENGERS | -1.0327904 | 0.3755274  | 6.13E-01 | 1 |
| GO_CEREBELLAR_CORTEX_MORPHOGENESIS                                                    | -1.0564822 | 0.3759124  | 5.70E-01 | 1 |
| GO_COENZYME_BIOSYNTHETIC_PROCESS                                                      | -1.022167  | 0.37704918 | 6.31E-01 | 1 |
| GO_Glutamine_Metabolic_Process                                                        | -1.0325959 | 0.37984496 | 6.13E-01 | 1 |
| DACOSTA_LOW_DOSE_UV_RESPONSE_VIA_ERCC3_XPCS_UP                                        | -1.0309615 | 0.3802817  | 6.15E-01 | 1 |
| GO_HISTONE_UBIQUITINATION                                                             | -1.0551742 | 0.38076922 | 5.72E-01 | 1 |
| WALLACE_JAK2_TARGETS_UP                                                               | -1.0569527 | 0.38132295 | 5.69E-01 | 1 |
| HALLMARK_PANCREAS_BETA_CELLS                                                          | -1.0532775 | 0.38135594 | 5.75E-01 | 1 |
| HANN_RESISTANCE_TO_BCL2_INHIBITOR_UP                                                  | -1.0609493 | 0.3815261  | 5.62E-01 | 1 |
| GO_REGULATION_OF_MUSCLE_CELL_APOPTOTIC_PROCESS                                        | -1.0380403 | 0.38222224 | 6.04E-01 | 1 |
| GO_MRNA_CLEAVAGE                                                                      | -1.0479556 | 0.38263667 | 5.85E-01 | 1 |
| GO_SNRNA_PROCESSING                                                                   | -1.0451235 | 0.3857143  | 5.90E-01 | 1 |
| GO_DEOXYRIBOSE_PHOSPHATE_CATABOLIC_PROCESS                                            | -1.0393164 | 0.38652483 | 6.01E-01 | 1 |
| GO_NEGATIVE_REGULATION_OF_RELEASE_OF_CYTOCHROME_C_FROM_MITOCHONDRIA                   | -1.039227  | 0.38666666 | 6.01E-01 | 1 |
| GO_GENE_SILENCING_BY_RNA                                                              | -1.0169089 | 0.38709676 | 6.37E-01 | 1 |
| GO_SMOOTH_MUSCLE_TISSUE_DEVELOPMENT                                                   | -1.0500563 | 0.3880597  | 5.81E-01 | 1 |
| GO_TRANSCRIPTION_FACTOR_TFIID_COMPLEX                                                 | -1.0467159 | 0.38906753 | 5.88E-01 | 1 |
| CHOI_ATL_STAGE_PREDICTOR                                                              | -1.0270933 | 0.38938054 | 6.23E-01 | 1 |
| GO_NONMOTILE_PRIMARY_CILIUM_ASSEMBLY                                                  | -1.0601139 | 0.39041096 | 5.64E-01 | 1 |
| GO_CARDIAC_MUSCLE_CELL_CONTRACTION                                                    | -1.043832  | 0.39163497 | 5.93E-01 | 1 |
| GO_SERTOLI_CELL_DEVELOPMENT                                                           | -1.0656343 | 0.39261746 | 5.56E-01 | 1 |
| KEGG_ONE_CARBON_POOL_BY_FOLATE                                                        | -1.0557576 | 0.3935484  | 5.71E-01 | 1 |
| RODWELL_AGING_KIDNEY_NO_BLOOD_DN                                                      | -1.0193869 | 0.39473686 | 6.34E-01 | 1 |
| CHOW_RASSF1_TARGETS_UP                                                                | -1.0323476 | 0.3951049  | 6.13E-01 | 1 |
| GO_UNFOLDED_PROTEIN_BINDING                                                           | -1.0400974 | 0.39869282 | 6.00E-01 | 1 |

|                                                                        |            |            |          |   |
|------------------------------------------------------------------------|------------|------------|----------|---|
| GO_CARDIAC_MUSCLE_CELL_ACTIVATION_POTENTIAL                            | -1.0165642 | 0.3991228  | 6.37E-01 | 1 |
| WALLACE_PROSTATE_CANCER_UP                                             | -1.0411648 | 0.39937106 | 5.98E-01 | 1 |
| GO_CELLULAR_PROCESS_INVOLVED_IN_REPRODUCTION_IN_MULTICELLULAR_ORGANISM | -1.0233421 | 0.4        | 6.28E-01 | 1 |
| GOUYER_TATI_TARGETS_DN                                                 | -1.020971  | 0.4013378  | 6.33E-01 | 1 |
| GO-NLS_BEARING_PROTEIN_IMPORT_INTO_NUCLEUS                             | -1.0204875 | 0.40140846 | 6.33E-01 | 1 |
| GO_PROTEIN_SUMOYLATION                                                 | -1.0519251 | 0.40186915 | 5.78E-01 | 1 |
| GO_SUBSTRATE_DEPENDENT_CELL_MIGRATION                                  | -1.0462173 | 0.40229884 | 5.88E-01 | 1 |
| ZAMORA_NOS2_TARGETS_UP                                                 | -1.0253145 | 0.40229884 | 6.24E-01 | 1 |
| REACTOME_METABOLISM_OF_AMINO_ACIDS_AND_DERIVATIVES                     | -1.000071  | 0.4032258  | 6.66E-01 | 1 |
| GO_DNA_METHYLATION                                                     | -1.0338616 | 0.40392157 | 6.12E-01 | 1 |
| GO_OXIDOREDUCTASE_ACTIVITY_ACTING_ON_THE_CH_NH2_GROUP_OF_DONORS        | -1.0428488 | 0.4057971  | 5.96E-01 | 1 |
| GO_GUANOSINE_CONTAINING_COMPOUND_METABOLIC_PROCESSES                   | -1.0235386 | 0.4059829  | 6.28E-01 | 1 |
| PETROVA_PROX1_TARGETS_UP                                               | -1.0059799 | 0.40625    | 6.55E-01 | 1 |
| GO_GLIAL_CELL_DEVELOPMENT                                              | -1.0324262 | 0.4064171  | 6.13E-01 | 1 |
| GO_OXIDOREDUCTASE_ACTIVITY_OXIDIZING_METAL_IONS                        | -1.0019124 | 0.40789473 | 6.64E-01 | 1 |
| GO_FERTILIZATION                                                       | -1.026531  | 0.40833333 | 6.23E-01 | 1 |
| GO_INTRAMOLECULAR_TRANSFERASE_ACTIVITY                                 | -1.0402942 | 0.4085603  | 6.00E-01 | 1 |
| GO_NEURAL_TUBE_PATTERNING                                              | -1.0174298 | 0.40939596 | 6.36E-01 | 1 |
| GO_GENE_SILENCING                                                      | -1.0266806 | 0.40983605 | 6.24E-01 | 1 |
| YU_MYC_TARGETS_DN                                                      | -0.9926533 | 0.4107143  | 6.79E-01 | 1 |
| GO_REGULATION_OF_GLYCOGENOGENESIS                                      | -1.0274271 | 0.41125542 | 6.23E-01 | 1 |
| GO_DNA_METHYLATION_OR_DEMETHYLATION                                    | -1.0186614 | 0.4117647  | 6.34E-01 | 1 |
| PARK_HSC_VS_MULTIPOTENT_PROGENITORS_DN                                 | -1.0020101 | 0.4129693  | 6.64E-01 | 1 |
| GO_REGULATION_OF_DNA_METABOLIC_PROCESS                                 | -1.0333827 | 0.41379312 | 6.13E-01 | 1 |
| TAYLOR_METHYLATED_IN_ACUTE_LYMPHOBLASTIC_LEUKEMIA                      | -1.018932  | 0.41401273 | 6.34E-01 | 1 |
| REACTOME_RNA_POL_I_TRANSCRIPTION_INITIATION                            | -1.0189105 | 0.4140625  | 6.34E-01 | 1 |
| GO_EXCITATORY_POSTSYNAPTIC_POTENTIAL                                   | -1.0253494 | 0.41532257 | 6.25E-01 | 1 |

|                                                                 |            |            |          |   |
|-----------------------------------------------------------------|------------|------------|----------|---|
| GO_CHAPERONE_BINDING                                            | -1.0032853 | 0.41566265 | 6.61E-01 | 1 |
| TONKS_TARGETS_OF_RUNX1_RU<br>NX1T1_FUSION_GRANULOCYTE_<br>DN    | -1.0263216 | 0.41638225 | 6.23E-01 | 1 |
| GO_CEREBELLAR_CORTEX_FOR<br>MATION                              | -1.0134223 | 0.41750842 | 6.42E-01 | 1 |
| GUTIERREZ_MULTIPLE_MYELOMA<br>UP                                | -1.0091307 | 0.4183267  | 6.49E-01 | 1 |
| NIKOLSKY_BREAST_CANCER_15Q<br>26_AMPLICON                       | -1.0202155 | 0.41836736 | 6.33E-01 | 1 |
| GO_POSITIVE_REGULATION_OF_<br>LIGASE_ACTIVITY                   | -1.0152643 | 0.42105263 | 6.39E-01 | 1 |
| REACTOME_ADP_SIGNALLING_TH<br>ROUGH_P2RY12                      | -1.0203742 | 0.42142856 | 6.33E-01 | 1 |
| KEGG_PYRUVATE_METABOLISM                                        | -0.9808946 | 0.42173913 | 7.00E-01 | 1 |
| GO_MONOCYTE_CHEMOTAXIS                                          | -1.0104028 | 0.4227941  | 6.46E-01 | 1 |
| GO_NEURAL_NUCLEUS_DEVELOP<br>MENT                               | -1.0118551 | 0.42364532 | 6.44E-01 | 1 |
| GO_COCHLEA_MORPHOGENESIS                                        | -1.0138446 | 0.4248366  | 6.42E-01 | 1 |
| GO_TRICARBOXYLIC_ACID_META<br>BOLIC_PROCESS                     | -1.0138366 | 0.42672414 | 6.42E-01 | 1 |
| GO_GENETIC_IMPRINTING                                           | -1.0009654 | 0.42718446 | 6.65E-01 | 1 |
| BIOCARTA_TEL_PATHWAY                                            | -1.0160196 | 0.42767295 | 6.38E-01 | 1 |
| GO_EMBRYONIC_CRANIAL_SKEL<br>ETON_MORPHOGENESIS                 | -1.0133903 | 0.43037975 | 6.42E-01 | 1 |
| GO_FATTY_ACID_BIOSYNTHETIC_<br>PROCESS                          | -1.007163  | 0.43065694 | 6.53E-01 | 1 |
| GO_CELLULAR_RESPONSE_TO_G<br>LUCAGON_STIMULUS                   | -1.0272459 | 0.43162394 | 6.23E-01 | 1 |
| GO_TBP_CLASS_PROTEIN_BINDI<br>NG                                | -1.0191054 | 0.43223444 | 6.34E-01 | 1 |
| GO_LEUKOCYTE_HOMEOSTASIS                                        | -1.0113173 | 0.43406594 | 6.45E-01 | 1 |
| GO_NEGATIVE_REGULATION_OF_<br>MUSCLE_CELL_APOPTOTIC_PRO<br>CESS | -1.0136641 | 0.436214   | 6.42E-01 | 1 |
| GO_REGULATION_OF_DOPAMINE<br>SECRETION                          | -1.024474  | 0.43648207 | 6.26E-01 | 1 |
| GO_SNORNA_BINDING                                               | -0.9981803 | 0.43686005 | 6.69E-01 | 1 |
| REACTOME_REGULATION_OF_IN<br>SULIN_SECRETION                    | -1.0154878 | 0.4397163  | 6.39E-01 | 1 |
| GO_ISOPRENOID_BIOSYNTHETIC<br>PROCESS                           | -0.9920982 | 0.4397163  | 6.80E-01 | 1 |
| REACTOME_RNA_POL_I_TRANSC<br>RIPTION_TERMINATION                | -0.9885166 | 0.4397163  | 6.87E-01 | 1 |
| KORKOLA_YOLK_SAC_TUMOR_U<br>P                                   | -1.0265799 | 0.43986255 | 6.23E-01 | 1 |
| KEGG_HUNTINGTONS_DISEASE                                        | -0.991279  | 0.44047618 | 6.81E-01 | 1 |



|                                                                                |            |            |          |   |
|--------------------------------------------------------------------------------|------------|------------|----------|---|
| GO_MEMBRANE_DEPOLARIZATION                                                     | -1.0108205 | 0.44131455 | 6.45E-01 | 1 |
| GO_CELL_CELL_RECOGNITION                                                       | -0.9937139 | 0.44166666 | 6.79E-01 | 1 |
| CROMER_TUMORIGENESIS_DN                                                        | -0.998449  | 0.44298247 | 6.69E-01 | 1 |
| GO_CARDIAC_RIGHT_VENTRICLE_MORPHOGENESIS                                       | -0.9957765 | 0.44642857 | 6.74E-01 | 1 |
| PETROVA_ENDOTHELIUM_LYMPHATIC_VS_BLOOD_UP                                      | -0.9991345 | 0.44660193 | 6.68E-01 | 1 |
| REACTOME_CYCLIN_E_ASSOCIATED_EVENTS_DURING_G1_S_TRANSITION                     | -0.9977014 | 0.4467005  | 6.70E-01 | 1 |
| REACTOME_G0_AND_EARLY_G1                                                       | -1.0010942 | 0.44966444 | 6.65E-01 | 1 |
| GO_REGULATION_OF_DNA_BIOSYNTHETIC_PROCESS                                      | -1.0125453 | 0.45070422 | 6.43E-01 | 1 |
| GO_CENTRAL_NERVOUS_SYSTEM_NEURON_DEVELOPMENT                                   | -1.0060413 | 0.4507772  | 6.55E-01 | 1 |
| REACTOME_DEADENYLATION_OF_MRNA                                                 | -1.0013281 | 0.45423728 | 6.65E-01 | 1 |
| REACTOME_SHC_MEDIATED_CASCADE                                                  | -0.9829671 | 0.45555556 | 6.97E-01 | 1 |
| KEGG_RNA_POLYMERASE                                                            | -1.0206459 | 0.4559387  | 6.33E-01 | 1 |
| GO_SERTOLI_CELL_DIFFERENTIATION                                                | -0.9789668 | 0.45918366 | 7.03E-01 | 1 |
| XU_HGF_SIGNALING_NOT_VIA_AKT1_48HR_DN                                          | -0.9995171 | 0.460177   | 6.67E-01 | 1 |
| GO_RESPONSE_TO_GLUCAGON                                                        | -1.0065343 | 0.4608295  | 6.54E-01 | 1 |
| GO_POSITIVE_REGULATION_OF_AXON_EXTENSION                                       | -1.0009384 | 0.46090534 | 6.64E-01 | 1 |
| GO_ERROR_PRONE_TRANSLESION_SYNTHESIS                                           | -0.9604532 | 0.46127945 | 7.31E-01 | 1 |
| GO_AXONAL_FASCICULATION                                                        | -1.008859  | 0.4620462  | 6.49E-01 | 1 |
| CHEN_ETV5_TARGETS_SERTOLI                                                      | -0.9873557 | 0.4636678  | 6.89E-01 | 1 |
| GO_REGULATION_OF_RHODOPSIN_MEDIATED_SIGNALING_PATHWAY                          | -0.9908889 | 0.46387833 | 6.81E-01 | 1 |
| WANG_TUMOR_INVASIVENESS_UP                                                     | -0.9844605 | 0.4642857  | 6.95E-01 | 1 |
| GROSS_HYPOXIA_VIA_HIF1A_UP                                                     | -1.0054742 | 0.46551725 | 6.56E-01 | 1 |
| GO_HETEROPHILIC_CELL_CELL_ADHESION_VIA_PLASMA_MembrANE_CELL_ADHESION_MOLECULES | -0.9965212 | 0.46640316 | 6.73E-01 | 1 |
| MMS_MOUSE_LYMPH_HIGH_4HRS_UP                                                   | -0.9617113 | 0.46666667 | 7.28E-01 | 1 |
| GO_Glutamate_SECRETION                                                         | -0.9781913 | 0.46718147 | 7.03E-01 | 1 |
| ONO_AML1_TARGETS_DN                                                            | -0.9930119 | 0.46818182 | 6.79E-01 | 1 |
| GO_RNA_POLYADENYLATION                                                         | -0.9943934 | 0.46825397 | 6.77E-01 | 1 |

|                                                                                       |            |            |          |   |
|---------------------------------------------------------------------------------------|------------|------------|----------|---|
| REACTOME_REGULATION_OF_INSULIN_SECRETION_BY_GLUCAGON LIKE PEPTIDE1                    | -0.9735646 | 0.46887967 | 7.09E-01 | 1 |
| GO_MITOTIC_CELL_CYCLE_CHECKPOINT                                                      | -1.0170307 | 0.47058824 | 6.37E-01 | 1 |
| GO_ENDOPLASMIC_RETICULUM_SUBCOMPARTMENT                                               | -0.9856129 | 0.4713376  | 6.93E-01 | 1 |
| GO_REGULATION_OF_DENDRITIC SPINE MORPHOGENESIS                                        | -0.9732058 | 0.4722222  | 7.10E-01 | 1 |
| GO_RETINOIC_ACID_METABOLIC_PROCESS                                                    | -0.9519383 | 0.47315437 | 7.47E-01 | 1 |
| WANG_RESPONSE_TO_FORSKOLIN UP                                                         | -0.9795507 | 0.47349823 | 7.02E-01 | 1 |
| GO_POSITIVE_REGULATION_OF_ORGAN GROWTH                                                | -0.9801597 | 0.4743083  | 7.01E-01 | 1 |
| GO_AROMATIC_AMINO_ACID_FAMILY METABOLIC PROCESS                                       | -0.9528071 | 0.47482014 | 7.45E-01 | 1 |
| ZHAN_MULTIPLE_MYELOMA_CD2 UP                                                          | -0.9847487 | 0.475      | 6.95E-01 | 1 |
| YAMASHITA_LIVER_CANCER_WITH EPCAM UP                                                  | -0.9929941 | 0.47549018 | 6.79E-01 | 1 |
| BENPORATH_ES_2                                                                        | -0.9822339 | 0.4755245  | 6.99E-01 | 1 |
| GO_RESPONSE_TO_IONIZING_RADIATION                                                     | -0.9810256 | 0.47777778 | 7.01E-01 | 1 |
| PRAMOONJAGO_SOX4_TARGETS DN                                                           | -0.9937039 | 0.48095238 | 6.78E-01 | 1 |
| GO_REGULATION_OF_DNA_TEMP LATED_TRANSCRIPTION_ELONGATION                              | -0.9880872 | 0.4820144  | 6.88E-01 | 1 |
| GO_INO80_TYPE_COMPLEX                                                                 | -0.9686621 | 0.4820847  | 7.18E-01 | 1 |
| REACTOME_G_PROTEIN_BETA_GAMMA SIGNALLING                                              | -0.9767249 | 0.48301888 | 7.05E-01 | 1 |
| MASRI_RESISTANCE_TO_TAMOXIFEN_AND_AROMATASE_INHIBITORS DN                             | -0.9730802 | 0.48464164 | 7.10E-01 | 1 |
| GO_GLYCINE_METABOLIC_PROCESS                                                          | -0.9743161 | 0.4847561  | 7.09E-01 | 1 |
| GO_NEGATIVE_REGULATION_OF_INTRINSIC_APOPTOTIC_SIGNALING_PATHWAY_BY_P53_CLASS_MEDIATOR | -0.9666532 | 0.48514852 | 7.20E-01 | 1 |
| GO_RIBOSOME_BINDING                                                                   | -0.9879875 | 0.48559672 | 6.88E-01 | 1 |
| GO_ESTABLISHMENT_OF_MITOTIC SPINDLE LOCALIZATION                                      | -0.9769874 | 0.4861111  | 7.05E-01 | 1 |
| GO_REPRESSING_TRANSCRIPTION FACTOR BINDING                                            | -0.9702528 | 0.49197862 | 7.16E-01 | 1 |
| CHANDRAN_METASTASIS_TOP50 UP                                                          | -0.9814072 | 0.49253732 | 7.00E-01 | 1 |

|                                                                                           |            |            |          |   |
|-------------------------------------------------------------------------------------------|------------|------------|----------|---|
| GO_WNT_ACTIVATED_RECEPTOR_ACTIVITY                                                        | -0.9920564 | 0.49295774 | 6.79E-01 | 1 |
| GO_NUCLEOBASE_CONTAINING_SMALL_MOLECULE_INTERCONVERSION                                   | -0.954045  | 0.4944238  | 7.43E-01 | 1 |
| JOHANSSON_GLIOMAGENESIS_BY_PDGFB_DN                                                       | -0.9623998 | 0.49454546 | 7.27E-01 | 1 |
| PUJANA_BREAST_CANCER_LIT_INT_NETWORK                                                      | -0.9787378 | 0.49635038 | 7.02E-01 | 1 |
| GO_HISTONE_MRNA_METABOLIC_PROCESS                                                         | -0.9806008 | 0.49822065 | 7.01E-01 | 1 |
| GO_SUPEROXIDE_METABOLIC_PROCESS                                                           | -0.9792254 | 0.49823323 | 7.02E-01 | 1 |
| GO_SEXUAL_REPRODUCTION                                                                    | -1.0120419 | 0.5        | 6.44E-01 | 1 |
| GO_CELLULAR_AMIDE_METABOLIC_PROCESS                                                       | -1.011195  | 0.5        | 6.45E-01 | 1 |
| HALLMARK_UNFOLDED_PROTEIN_RESPONSE                                                        | -0.9948553 | 0.5        | 6.77E-01 | 1 |
| PID_REG_GR_PATHWAY                                                                        | -0.9836023 | 0.5        | 6.97E-01 | 1 |
| WHITFIELD_CELL_CYCLE_G2                                                                   | -0.977194  | 0.5        | 7.05E-01 | 1 |
| GO_CELL_CYCLE_CHECKPOINT                                                                  | -0.9739093 | 0.5        | 7.09E-01 | 1 |
| TAKAO_RESPONSE_TO_UVB_RADIATION_UP                                                        | -0.9665611 | 0.5        | 7.20E-01 | 1 |
| GO_MACROMOLECULE_TRANSMEMBRANE_TRANSPORTER_ACTIVITY                                       | -0.9488167 | 0.5        | 7.51E-01 | 1 |
| GO_OXIDOREDUCTASE_ACTIVITY_ACTING_ON_SINGLE_DONORS_WITH_INCORPORATION_OF_MOLECULAR_OXYGEN | -0.9683919 | 0.5016835  | 7.18E-01 | 1 |
| GO_PROTEIN_IMPORT_INTO_NUCLEUS_TRANSLOCATION                                              | -0.9700375 | 0.5017182  | 7.15E-01 | 1 |
| REACTOME_G_BETA_GAMMA_SIGNALING_THROUGH_PLC_BETA                                          | -0.9677457 | 0.5017668  | 7.18E-01 | 1 |
| GO_REGULATION_OF_VASODILATION                                                             | -0.9788042 | 0.50212765 | 7.02E-01 | 1 |
| GO_REGULATION_OF_DENDRITIC_SPINE_DEVELOPMENT                                              | -0.9682991 | 0.50246304 | 7.17E-01 | 1 |
| CAFFAREL_RESPONSE_TO_THC_24HR_5_DN                                                        | -0.9786024 | 0.50259066 | 7.02E-01 | 1 |
| GO_POSITIVE_REGULATION_OF_EXCITATORY_POSTSYNAPTIC_POTENTIAL                               | -0.9517779 | 0.5035461  | 7.46E-01 | 1 |
| GO_ZINC_ION_HOMEOSTASIS                                                                   | -0.9276285 | 0.5051546  | 7.83E-01 | 1 |
| REACTOME_KINESINS                                                                         | -0.9361268 | 0.5055762  | 7.67E-01 | 1 |
| GO_MITOTIC_SPINDLE                                                                        | -0.9754981 | 0.50660795 | 7.07E-01 | 1 |

|                                                            |            |            |          |   |
|------------------------------------------------------------|------------|------------|----------|---|
| GO_TRANSLATION_INITIATION_FACTOR_BINDING                   | -0.965662  | 0.5066225  | 7.21E-01 | 1 |
| GO_RESPONSE_TO_CAFFEINE                                    | -0.9474779 | 0.5066225  | 7.52E-01 | 1 |
| GO_TETRAPYRROLE_BIOSYNTHETIC_PROCESS                       | -0.9740592 | 0.509434   | 7.09E-01 | 1 |
| MASSARWEH_RESPONSE_TO_ESTADIOL                             | -0.9479044 | 0.509901   | 7.51E-01 | 1 |
| GO_NUCLEOSIDE_TRIPHOSPHATE_BIOSYNTHETIC_PROCESS            | -0.9627448 | 0.5106383  | 7.26E-01 | 1 |
| GO_REGULATION_OF_IMMUNOGLOBULIN_PRODUCTION                 | -0.9506409 | 0.51131225 | 7.47E-01 | 1 |
| WOOD_EBV_EBNA1_TARGETS_DOWN                                | -0.9690628 | 0.5126051  | 7.17E-01 | 1 |
| WHITFIELD_CELL_CYCLE_MG1                                   | -0.9725964 | 0.51376146 | 7.10E-01 | 1 |
| GO_SINGLE_STRANDED_RNA_BINDING                             | -0.9657151 | 0.51428574 | 7.22E-01 | 1 |
| GO_CAMP_METABOLIC_PROCESS                                  | -0.9629692 | 0.51428574 | 7.27E-01 | 1 |
| REACTOME_FORMATION_OF_INCISION_COMPLEX_IN_GGNER            | -0.9580281 | 0.5148515  | 7.37E-01 | 1 |
| GO_E_BOX_BINDING                                           | -0.9764057 | 0.5156794  | 7.05E-01 | 1 |
| WEBER_METHYLATED_HCP_IN_FIBROBLAST_DOWN                    | -0.9670594 | 0.5162455  | 7.20E-01 | 1 |
| GO_OLIGOSACCHARIDE_LIPID_INTERMEDIATE_BIOSYNTHETIC_PROCESS | -0.9455499 | 0.5182724  | 7.56E-01 | 1 |
| RICKMAN_HEAD_AND_NECK_CANCER_DOWN                          | -0.9523892 | 0.5185185  | 7.46E-01 | 1 |
| GO_HISTONE_DEUBIQUITINATION                                | -0.9363312 | 0.5197368  | 7.68E-01 | 1 |
| GO_HISTONE_BINDING                                         | -0.9922353 | 0.52112675 | 6.80E-01 | 1 |
| LIANG_SILENCED_BY_METHYLATION_UP                           | -0.9644994 | 0.5217391  | 7.23E-01 | 1 |
| GO_VIRAL_GENOME_REPLICATION                                | -0.9570355 | 0.5221843  | 7.38E-01 | 1 |
| KYNG_ENVIRONMENTAL_STRESS_RESPONSE_DOWN                    | -0.9743109 | 0.5229682  | 7.09E-01 | 1 |
| GO_NEGATIVE_REGULATION_OF_TELOMERE_MAINTENANCE             | -0.9519175 | 0.5232975  | 7.46E-01 | 1 |
| GARGALOVIC_RESPONSE_TO_OXIDIZED_PHOSPHOLIPIDS_RED_UP       | -0.9302616 | 0.52491695 | 7.77E-01 | 1 |
| GO_DOLICHOL_LINKED_OLIGOSACCHARIDE_BIOSYNTHETIC_PROCESS    | -0.9249964 | 0.5264797  | 7.85E-01 | 1 |
| BIOCARTA_NKT_PATHWAY                                       | -0.9362929 | 0.5272727  | 7.67E-01 | 1 |

|                                                            |            |            |          |   |
|------------------------------------------------------------|------------|------------|----------|---|
| GO_NEGATIVE_REGULATION_OF_CELL_CYCLE_G2_M_PHASE_TRANSITION | -0.9395086 | 0.5283688  | 7.64E-01 | 1 |
| GO_DEFINITIVE_HEMOPOIESIS                                  | -0.9326974 | 0.528481   | 7.72E-01 | 1 |
| COLIN_PILOCYTIC_ASTROCYTOMA VS GLIOBLASTOMA UP             | -0.941627  | 0.5289256  | 7.60E-01 | 1 |
| GO_ENERGY_DERIVATION_BY_OXIDATION_OF_ORGANIC_COMPOUNDS     | -0.980038  | 0.5294118  | 7.01E-01 | 1 |
| TURASHVILI_BREAST_DUCTAL_CARCINOMA VS LOBULAR_NORMAL UP    | -0.9575599 | 0.53038675 | 7.37E-01 | 1 |
| GO_ENDORIBONUCLEASE_COMPLEX                                | -0.9181165 | 0.53582555 | 7.96E-01 | 1 |
| GO_DETECTION_OF_MECHANICAL_STIMULUS                        | -0.9387642 | 0.536036   | 7.66E-01 | 1 |
| GO_MYOFILAMENT                                             | -0.955622  | 0.53731346 | 7.40E-01 | 1 |
| HU_GENOTOXIC_DAMAGE_4HR                                    | -0.9493073 | 0.53846157 | 7.50E-01 | 1 |
| SESTO_RESPONSE_TO_UV_C7                                    | -0.9701809 | 0.5388889  | 7.15E-01 | 1 |
| MIKKELSEN_ES_HCP_WITH_H3_UNMETHYLATED                      | -0.9554216 | 0.5391705  | 7.40E-01 | 1 |
| GO_NUCLEOSIDE_PHOSPHATE_BIOSYNTHETIC_PROCESS               | -0.9568731 | 0.5394737  | 7.38E-01 | 1 |
| GO_PTERIDINE_CONTAINING_COMPOUND_METABOLIC_PROCESS         | -0.9430218 | 0.54077256 | 7.60E-01 | 1 |
| RIZ_ERYTHROID_DIFFERENTIATION                              | -0.9726731 | 0.54140127 | 7.10E-01 | 1 |
| GO_COFACTOR_BIOSYNTHETIC_PROCESS                           | -0.960204  | 0.54347825 | 7.31E-01 | 1 |
| GO_SUBPALLIUM_DEVELOPMENT                                  | -0.9326569 | 0.5438067  | 7.71E-01 | 1 |
| HOFFMANN_SMALL_PRE_BII_TO_IMMATURE B LYMPHOCYTE DN         | -0.9629648 | 0.5441176  | 7.26E-01 | 1 |
| GO_RIBONUCLEOPROTEIN_GRANULE                               | -0.9743927 | 0.54545456 | 7.10E-01 | 1 |
| GO_METHYLATION                                             | -0.9572044 | 0.54545456 | 7.38E-01 | 1 |
| GO_CELLULAR_ALDEHYDE_METABOLIC_PROCESS                     | -0.9458067 | 0.5464481  | 7.56E-01 | 1 |
| GO_ORGANIC_ACID_SODIUM_SYMBOLPORTER ACTIVITY               | -0.9214616 | 0.54681647 | 7.90E-01 | 1 |
| GO_REGULATION_OF_SYNAPTIC_TRANSMISSION_GABAERGIC           | -0.9410299 | 0.5498008  | 7.61E-01 | 1 |
| GO_PURINE_CONTAINING_COMPOUND_BIOSYNTHETIC_PROCESS         | -0.9841303 | 0.5504587  | 6.96E-01 | 1 |
| GO_SEX_DETERMINATION                                       | -0.9131739 | 0.5520833  | 8.01E-01 | 1 |
| GO_CEREBELLAR_CORTEX_DEVELOPMENT                           | -0.9432135 | 0.5527426  | 7.60E-01 | 1 |

|                                                                                                                             |            |            |          |   |
|-----------------------------------------------------------------------------------------------------------------------------|------------|------------|----------|---|
| GO_Glutamine_family_Amino_Acid_Biosynthetic_Process                                                                         | -0.9386692 | 0.5529801  | 7.65E-01 | 1 |
| GO_MLL1_2_COMPLEX                                                                                                           | -0.9350827 | 0.5531136  | 7.69E-01 | 1 |
| BAKER_Hematopoiesis_STAT3_Targets                                                                                           | -0.9182759 | 0.556338   | 7.97E-01 | 1 |
| GO_FK506_BINDING                                                                                                            | -0.9176887 | 0.5601266  | 7.96E-01 | 1 |
| Reactome_Glucagon_Signaling_in_Metabolic_Regulation                                                                         | -0.9479461 | 0.5605381  | 7.52E-01 | 1 |
| Dutertre_Estradiol_Response_6hr_Up                                                                                          | -0.9814136 | 0.5614035  | 7.01E-01 | 1 |
| GO_Positive_Regulation_of_Telomerase_Activity                                                                               | -0.9231305 | 0.5620438  | 7.87E-01 | 1 |
| Reactome_Biosynthesis_of_the_N_Glycan_Precursor_Dolichol_Lipid_Linked_Oligosaccharide_LLO_and_Transfer_to_a_Nascent_Protein | -0.9369875 | 0.56302524 | 7.67E-01 | 1 |
| GO_Negative_Regulation_of_Reactive_Oxygen_Species_Metabolic_Process                                                         | -0.9548745 | 0.5652174  | 7.41E-01 | 1 |
| GO_RNA_Polymerase_II_Repressing_Transcription_Factor_Binding                                                                | -0.9428096 | 0.56554306 | 7.60E-01 | 1 |
| GO_Positive_Regulation_of_Acute_Inflammatory_Response                                                                       | -0.9385735 | 0.5660377  | 7.65E-01 | 1 |
| GO_Cyclin_Dependent_Protein_Kinase_Holoenzyme_Complex                                                                       | -0.9072344 | 0.5687023  | 8.09E-01 | 1 |
| WU_HBX_Targets_3_Up                                                                                                         | -0.9015243 | 0.5689655  | 8.18E-01 | 1 |
| DAVICIONI_Rhabdomyosarcoma_Pax_Foxo1_Fusion_Up                                                                              | -0.9371399 | 0.56914896 | 7.67E-01 | 1 |
| GO_Regulation_of_Telomerase_Activity                                                                                        | -0.9111086 | 0.5696721  | 8.04E-01 | 1 |
| GO_Peptidyl_Cysteine_Modification                                                                                           | -0.911583  | 0.57042253 | 8.04E-01 | 1 |
| Reactome_Abortive_Elongation_of_HIV1_Transcript_in_the_Absence_of_Tat                                                       | -0.9140905 | 0.57051283 | 8.00E-01 | 1 |
| SMID_Breast_Cancer_Relapse_in_Bone_Up                                                                                       | -0.9432477 | 0.5714286  | 7.61E-01 | 1 |
| BOYALT_Liver_Cancer_Subclass_G123_DN                                                                                        | -0.9454674 | 0.57261413 | 7.56E-01 | 1 |
| NIKOLSKY_Breast_Cancer_7Q2_1_Q22_Amplicon                                                                                   | -0.942031  | 0.5735294  | 7.60E-01 | 1 |
| Reactome_MiRNA_Mirna_Biogenesis                                                                                             | -0.8942391 | 0.5755627  | 8.26E-01 | 1 |

|                                                             |            |            |          |   |
|-------------------------------------------------------------|------------|------------|----------|---|
| IVANOVA_HEMATOPOIESIS_STEM_CELL_SHORT_TERM                  | -0.9003531 | 0.5777778  | 8.19E-01 | 1 |
| GO_REGULATION_OF_NITRIC_OXIDE_SYNTHASE_BIOSYNTHETIC_PROCESS | -0.8960713 | 0.5782748  | 8.24E-01 | 1 |
| GO_POSITIVE_REGULATION_OF_B_CELL_PROLIFERATION              | -0.9239183 | 0.57847536 | 7.86E-01 | 1 |
| GO_MONOAMINE_TRANSPORT                                      | -0.8998234 | 0.57859534 | 8.19E-01 | 1 |
| GO_CORECEPTOR_ACTIVITY                                      | -0.9154176 | 0.5787402  | 7.98E-01 | 1 |
| KIM_TIAL1_TARGETS                                           | -0.9340254 | 0.5805085  | 7.70E-01 | 1 |
| HAHTOLA_SEZARY_SYNDROM_UP                                   | -0.9436597 | 0.58064514 | 7.60E-01 | 1 |
| GO_MUSCLE_HYPERTROPHY                                       | -0.9062333 | 0.58064514 | 8.11E-01 | 1 |
| GO_NEGATIVE_REGULATION_OF_CATION_CHANNEL_ACTIVITY           | -0.9251207 | 0.581749   | 7.85E-01 | 1 |
| PID_FOXM1_PATHWAY                                           | -0.9264619 | 0.58181816 | 7.84E-01 | 1 |
| AKT_UP_MTOR_DN.V1_DN                                        | -0.9685626 | 0.5822785  | 7.18E-01 | 1 |
| GO_Glutamine_FAMILY_Amino_Acid_Metabolic_Process            | -0.9407786 | 0.5824176  | 7.61E-01 | 1 |
| GO_REGULATION_OF_RESPONSE_TO_REACTIVE_OXYGEN_SPECIES        | -0.9169391 | 0.5833333  | 7.97E-01 | 1 |
| DANG_REGULATED_BY_MYC_UP                                    | -0.9343444 | 0.58381504 | 7.69E-01 | 1 |
| KEGG_PROGESTERONE_MEDIATED_OOCYTE_MATURATION                | -0.9481185 | 0.5839416  | 7.52E-01 | 1 |
| GO_PROTEIN_TRANSMEMBRANE_TRANSPORT                          | -0.9422803 | 0.5845411  | 7.60E-01 | 1 |
| GO_PROTEIN_LOCALIZATION_TO_MITOCHONDRION                    | -0.9326857 | 0.58469945 | 7.72E-01 | 1 |
| HOSHIDA_LIVER_CANCER_SUBCLASS_S2                            | -0.950795  | 0.5849057  | 7.48E-01 | 1 |
| MARTINEZ_RESPONSE_TO TRABECTEDIN_DN                         | -0.9650493 | 0.58536583 | 7.22E-01 | 1 |
| STREICHER_LSM1_TARGETS_UP                                   | -0.924158  | 0.58549225 | 7.86E-01 | 1 |
| KEGG_SYSTEMIC_LUPUS_ERYTHEMATOSUS                           | -0.9487273 | 0.5862069  | 7.51E-01 | 1 |
| GO_NEGATIVE_REGULATION_OF_POTASSIUM_ION_TRANSPORT           | -0.9098501 | 0.58759123 | 8.06E-01 | 1 |
| GO_MRNA_BINDING                                             | -0.9832963 | 0.59090906 | 6.97E-01 | 1 |
| BUKANOVICH_T_LYMPHOCYTE_HOMING_ON_TUMOR_DN                  | -0.9022925 | 0.59090906 | 8.17E-01 | 1 |
| GO_PROTEIN_AUTOUBIQUITINATION                               | -0.9338926 | 0.5914894  | 7.70E-01 | 1 |
| REACTOME_SCF5P2_MEDIATED_DEGRADATION_OF_P27_P21             | -0.9425296 | 0.59195405 | 7.60E-01 | 1 |

|                                                                                                                            |            |            |          |   |
|----------------------------------------------------------------------------------------------------------------------------|------------|------------|----------|---|
| GO_POSITIVE_REGULATION_OF_NEUROLOGICAL_SYSTEM_PROCESSES                                                                    | -0.9067155 | 0.5925926  | 8.10E-01 | 1 |
| GO_REGULATION_OF_MYELOID_CELL_APOPTOTIC_PROCESS                                                                            | -0.9161581 | 0.5932836  | 7.98E-01 | 1 |
| RIZ_ERYTHROID_DIFFERENTIATION_CCNE1                                                                                        | -0.9268341 | 0.59386975 | 7.84E-01 | 1 |
| GAUSSMANN_MLL_AF4_FUSION_TARGETS_DOWN                                                                                      | -0.9048315 | 0.5951557  | 8.14E-01 | 1 |
| ABBUD_LIF_SIGNALING_1_DOWN                                                                                                 | -0.9006256 | 0.5971223  | 8.19E-01 | 1 |
| GO_COP9_SIGNALOSOME                                                                                                        | -0.9159586 | 0.5990991  | 7.98E-01 | 1 |
| GO_PURINE_RIBONUCLEOSIDE_BISPHOSPHATE_METABOLIC_PROCESS                                                                    | -0.8960615 | 0.6026936  | 8.24E-01 | 1 |
| GO_POSITIVE_REGULATION_OF_TRANSCRIPTION_FROM_RNA_POLYMERASE_II_PROMOTER_INVOLVED_IN_CELLULAR_RESPONSE_TO_CHEMICAL_STIMULUS | -0.8917852 | 0.60273975 | 8.30E-01 | 1 |
| GO_ERROR_FREE_TRANSLESION_SYNTHESIS                                                                                        | -0.8951873 | 0.6028881  | 8.24E-01 | 1 |
| TANAKA_METHYLATED_IN_ESOPHAGEAL_CARCINOMA                                                                                  | -0.9380159 | 0.60365856 | 7.65E-01 | 1 |
| GO_NEGATIVE_REGULATION_OF_TRANSLATIONAL_INITIATION                                                                         | -0.9029536 | 0.6044304  | 8.17E-01 | 1 |
| GO_CELLULAR_RESPONSE_TO_TOXIC_SUBSTANCE                                                                                    | -0.9195536 | 0.6061776  | 7.94E-01 | 1 |
| GO_FEAR_RESPONSE                                                                                                           | -0.8903962 | 0.6097561  | 8.32E-01 | 1 |
| GO_COMPLEMENT_BINDING                                                                                                      | -0.886543  | 0.61       | 8.35E-01 | 1 |
| HOLLEMAN_ASPARAGINASE_RESISTANCE_B_ALL_UP                                                                                  | -0.8874652 | 0.6102362  | 8.34E-01 | 1 |
| GO_REGULATION_OF_PROTEIN_TARGETING_TO_MITOCHONDRION                                                                        | -0.9419648 | 0.6111111  | 7.60E-01 | 1 |
| MELLMAN_TUT1_TARGETS_UP                                                                                                    | -0.8787145 | 0.61217946 | 8.46E-01 | 1 |
| NOUZOVA_TRETINOIN_AND_H4_ACETYLATION                                                                                       | -0.9513226 | 0.61417323 | 7.47E-01 | 1 |
| GO_LIGASE_ACTIVITY_FORMING_CARBON_NITROGEN_BONDS                                                                           | -0.9424365 | 0.6142857  | 7.60E-01 | 1 |
| REACTOME_RNA_POL_III_TRANSCRIPTION_INITIATION_FROM_TYP_E_3_PROMOTER                                                        | -0.9029685 | 0.61538464 | 8.17E-01 | 1 |
| GO_DYNEIN_COMPLEX                                                                                                          | -0.9112665 | 0.6160714  | 8.04E-01 | 1 |
| GO_MICROTUBULE_CYTOSKELETON_ORGANIZATION                                                                                   | -0.9291988 | 0.61764705 | 7.79E-01 | 1 |
| WORSCHER_TUMOR_EVASION_AND_TOLEROGENICITY_UP                                                                               | -0.9240404 | 0.62096775 | 7.86E-01 | 1 |



|                                                              |            |            |          |   |
|--------------------------------------------------------------|------------|------------|----------|---|
| GO_MACROLIDE_BINDING                                         | -0.8935841 | 0.6215278  | 8.27E-01 | 1 |
| GO_RESPONSE_TO_OXYGEN_RADICAL                                | -0.8959667 | 0.6221498  | 8.23E-01 | 1 |
| GO_LEFT_RIGHT_PATTERN_FORMATION                              | -0.8615303 | 0.6223022  | 8.73E-01 | 1 |
| KEGG_GLYCOSAMINOGLYCAN_BIOSYNTHESIS_HEPARAN_SULFATE          | -0.8871332 | 0.62357414 | 8.35E-01 | 1 |
| GO_ESC_E_Z_COMPLEX                                           | -0.8569711 | 0.6237288  | 8.76E-01 | 1 |
| HUTTMANN_B_CLL_POOR_SURVIVAL_DN                              | -0.9266721 | 0.625      | 7.84E-01 | 1 |
| RICKMAN_HEAD_AND_NECK_CANCER_F                               | -0.8882684 | 0.625      | 8.33E-01 | 1 |
| KEGG_CYSTEINE_AND_METHIONINE_METABOLISM                      | -0.8870894 | 0.625      | 8.34E-01 | 1 |
| GO_REGULATION_OF_CELLULAR_SENESCENCE                         | -0.8902655 | 0.6294964  | 8.31E-01 | 1 |
| GO_ASPARTIC_TYPE_PEPTIDASE_ACTIVITY                          | -0.8774759 | 0.6305733  | 8.47E-01 | 1 |
| BACOLOD_RESISTANCE_TO_ALKYLATING_AGENTS_DN                   | -0.9210553 | 0.63131315 | 7.90E-01 | 1 |
| GO_POSITIVE_REGULATION_OF_ORGANELLE_ASSEMBLY                 | -0.9009711 | 0.63135594 | 8.19E-01 | 1 |
| GO_REGULATION_OF_CHROMATIN_SILENCING                         | -0.8512085 | 0.633218   | 8.82E-01 | 1 |
| GO_THIOESTER_BIOSYNTHETIC_PROCESS                            | -0.9078561 | 0.6334842  | 8.08E-01 | 1 |
| GO_MULTI_ORGANISM_TRANSPORT                                  | -0.9081119 | 0.6335404  | 8.08E-01 | 1 |
| REACTOME_P53_DEPENDENT_G1_DNA_DAMAGE_RESPONSE                | -0.9178562 | 0.6344086  | 7.97E-01 | 1 |
| ZIRN_TRETINOIN_RESPONSE_WT1_UP                               | -0.8768739 | 0.6386861  | 8.47E-01 | 1 |
| GO_POTASSIUM_CHANNEL_REGULATOR_ACTIVITY                      | -0.9096202 | 0.6388889  | 8.06E-01 | 1 |
| GO_PYRIMIDINE_NUCLEOSIDE_METABOLIC_PROCESS                   | -0.9261383 | 0.6391304  | 7.83E-01 | 1 |
| NIELSEN_GIST_AND_SYNOVIAL_SARCOMA_DN                         | -0.8663726 | 0.64026403 | 8.67E-01 | 1 |
| GO_NUCLEAR_PERIPHERY                                         | -0.9239067 | 0.64122134 | 7.85E-01 | 1 |
| GO_POSITIVE_REGULATION_OF_CELL_ADHESION_MEDIATED_BY_INTEGRIN | -0.8742142 | 0.6421725  | 8.52E-01 | 1 |
| GO_RIBONUCLEOSIDE_TRIPHOSPHATE_BIOSYNTHETIC_PROCESS          | -0.8964937 | 0.64319247 | 8.24E-01 | 1 |

|                                                        |            |            |          |   |
|--------------------------------------------------------|------------|------------|----------|---|
| REACTOME_FORMATION_OF_RNA_POL_II_ELONGATION_COMPLEX    | -0.9037187 | 0.6437247  | 8.16E-01 | 1 |
| LOPEZ_TRANSLATION_VIA_FFN1_SIGNALING                   | -0.8972125 | 0.645      | 8.23E-01 | 1 |
| GO_POSITIVE_REGULATION_OF_KIDNEY_DEVELOPMENT           | -0.8845465 | 0.6486486  | 8.37E-01 | 1 |
| GO_REGULATION_OF_RESPONSE_TO_OXIDATIVE_STRESS          | -0.9097192 | 0.6496815  | 8.06E-01 | 1 |
| GO_OOCYTE_DIFFERENTIATION                              | -0.868057  | 0.65       | 8.64E-01 | 1 |
| MATZUK_SPERMATOZOA                                     | -0.9345946 | 0.6510067  | 7.69E-01 | 1 |
| BIOCARTA_IGF1MTOR_PATHWAY                              | -0.8591913 | 0.652027   | 8.73E-01 | 1 |
| KEGG_PROTEASOME                                        | -0.8977122 | 0.6527197  | 8.22E-01 | 1 |
| GO_MAST_CELL_MEDIATED_IMMUNITY                         | -0.8619978 | 0.65273315 | 8.72E-01 | 1 |
| REACTOME_PYRUVATE_METABOLISM                           | -0.8555554 | 0.65319866 | 8.78E-01 | 1 |
| GO_CENTRIOLAR_SATELLITE                                | -0.8698509 | 0.65436244 | 8.61E-01 | 1 |
| GO_ONE_CARBON_METABOLIC_PROCESS                        | -0.8602083 | 0.65591395 | 8.74E-01 | 1 |
| GO_HINDBRAIN_MORPHOGENESIS                             | -0.8825128 | 0.65625    | 8.41E-01 | 1 |
| GO_ACYL_COA_BIOSYNTHETIC_PROCESS                       | -0.9082578 | 0.65800864 | 8.09E-01 | 1 |
| VIETOR_IFRD1_TARGETS                                   | -0.8521765 | 0.65909094 | 8.83E-01 | 1 |
| GO_CEREBELLAR_PURKINJE_CELL_LAYER_DEVELOPMENT          | -0.8903993 | 0.65925926 | 8.32E-01 | 1 |
| STAEGE_EWING_FAMILY_TUMOR                              | -0.8458996 | 0.6594982  | 8.89E-01 | 1 |
| GO_REGULATION_OF_CELL_CYCLE_CHECKPOINT                 | -0.8837112 | 0.6617647  | 8.38E-01 | 1 |
| TURASHVILI_BREAST_DUCTAL_CARCINOMA_VS_DUCTAL_NORMAL_UP | -0.8893446 | 0.6625     | 8.32E-01 | 1 |
| GO_REGULATION_OF_MICROTUBULE_POLYMERIZATION            | -0.8803608 | 0.66283524 | 8.44E-01 | 1 |
| GO_MULTI_ORGANISM_LOCALIZATION                         | -0.915716  | 0.6632124  | 7.98E-01 | 1 |
| GO_NEUROTRANSMITTER_BINDING                            | -0.8516565 | 0.66435987 | 8.82E-01 | 1 |
| REACTOME_DESTABILIZATION_OF_MRNA_BY_BRF1               | -0.8612702 | 0.6643836  | 8.73E-01 | 1 |
| LEE_LIVER_CANCER_DENA_DN                               | -0.8991604 | 0.6647059  | 8.20E-01 | 1 |
| CHAUHAN_RESPONSE_TO_METHOXYESTRADIOL_UP                | -0.8917431 | 0.66486484 | 8.29E-01 | 1 |
| GO_REGULATION_OF_MEMBRANE_REPOLARIZATION               | -0.8777909 | 0.6678201  | 8.47E-01 | 1 |

|                                                         |            |            |          |   |
|---------------------------------------------------------|------------|------------|----------|---|
| GO_NUCLEOTIDE_EXCISION_REPAIR_DNA_DAMAGE_RECOGNITION    | -0.848786  | 0.66787004 | 8.85E-01 | 1 |
| GO_HISTONE_METHYLTRANSFERASE_COMPLEX                    | -0.8968192 | 0.6717949  | 8.23E-01 | 1 |
| GO_PHOSPHATIDYLINOSITOL_3_5_BISPHOSPHATE_BINDING        | -0.8572098 | 0.67320263 | 8.76E-01 | 1 |
| GO_PITUITARY_GLAND_DEVELOPMENT                          | -0.8846895 | 0.6740088  | 8.38E-01 | 1 |
| FARMER_BREAST_CANCER_APOCRINE_VS_BASAL                  | -0.9348842 | 0.67741936 | 7.69E-01 | 1 |
| GO_NEGATIVE_REGULATION_OF_DNA_BIOSYNTHETIC_PROCESS      | -0.8649352 | 0.67741936 | 8.67E-01 | 1 |
| GO_NUCLEOTIDE_EXCISION_REPAIR_DNA_DUPLEX_UNWINDING      | -0.845108  | 0.67785233 | 8.88E-01 | 1 |
| GO_POSITIVE_REGULATION_OF_INSULIN_SECRETION             | -0.8732894 | 0.67980295 | 8.54E-01 | 1 |
| SHIN_B_CELL_LYMPHOMA_CLUSTER_5                          | -0.8424552 | 0.6807818  | 8.90E-01 | 1 |
| GO_NEGATIVE_REGULATION_OF_CARTILAGE_DEVELOPMENT         | -0.8799312 | 0.6818182  | 8.44E-01 | 1 |
| ZHAN_VARIABLE_EARLY_DIFFERENTIATION_GENES_DN            | -0.8647922 | 0.6827309  | 8.67E-01 | 1 |
| THUM_SYSTOLIC_HEART_FAILURE_DN                          | -0.9260505 | 0.6849315  | 7.83E-01 | 1 |
| BOYALT_LIVER_CANCER_SUBCLASS_G23_UP                     | -0.8891105 | 0.685446   | 8.32E-01 | 1 |
| GO_NEGATIVE_REGULATION_OF_CHONDROCYTE_DIFFERENTIATION   | -0.8176275 | 0.6858108  | 9.13E-01 | 1 |
| GO_REGULATION_OF_STRIATED_MUSCLE_CELL_APOPTOTIC_PROCESS | -0.8518324 | 0.6875     | 8.83E-01 | 1 |
| GO_ALPHA_AMINO_ACID_METABOLIC_PROCESS                   | -0.9363107 | 0.6885246  | 7.68E-01 | 1 |
| GO_SYNAPTIC_TRANSMISSION_GLUTAMATERGIC                  | -0.8300414 | 0.6886447  | 9.00E-01 | 1 |
| GENTILE_UV_RESPONSE_CLUSTER_D4                          | -0.9001144 | 0.68899524 | 8.19E-01 | 1 |
| KEGG_ALANINE_ASPARTATE_AND_GLUTAMATE_METABOLISM         | -0.8779171 | 0.692      | 8.47E-01 | 1 |
| GO_CENTROSOME                                           | -0.9383797 | 0.6923077  | 7.65E-01 | 1 |
| SPIELMAN_LYMPHOBLAST_EUROPEAN_VS_ASIAN_2FC_DN           | -0.8150692 | 0.6923077  | 9.13E-01 | 1 |
| GO_PROTEIN_LOCALIZATION_TO_CELL_SURFACE                 | -0.8335016 | 0.69520545 | 8.98E-01 | 1 |
| DE_YY1_TARGETS_UP                                       | -0.8224233 | 0.6958042  | 9.10E-01 | 1 |

|                                                                  |            |            |          |   |
|------------------------------------------------------------------|------------|------------|----------|---|
| LOPES_METHYLATED_IN_COLON_CANCER_DN                              | -0.8467406 | 0.6977612  | 8.88E-01 | 1 |
| REACTOME_THROMBOXANE_SIGNALING_THROUGH_TP_RECEPTOR               | -0.8423749 | 0.69921875 | 8.90E-01 | 1 |
| GO_MIDDLE_EAR_MORPHOGENESIS                                      | -0.8212887 | 0.6996587  | 9.10E-01 | 1 |
| GO_FEMALE_GAMETE_GENERATION                                      | -0.9222843 | 0.7016575  | 7.88E-01 | 1 |
| GO_APOPTOTIC_NUCLEAR_CHANGES                                     | -0.8208653 | 0.70547944 | 9.10E-01 | 1 |
| KEGG_MATURITY_ONSET_DIABETES_OF_THE_YOUNG                        | -0.8326329 | 0.70689654 | 8.99E-01 | 1 |
| GO_EXON_EXON_JUNCTION_COMPLEX                                    | -0.8343405 | 0.7089041  | 8.98E-01 | 1 |
| GO_CYTOKINE_PRODUCTION_INVOLVED_IN_IMMUNE_RESPONSE               | -0.8329393 | 0.71034485 | 8.99E-01 | 1 |
| KAMIKUBO_MYELOID_MN1_NETWORK                                     | -0.8436247 | 0.7104377  | 8.89E-01 | 1 |
| GO_RESPONSE_TO_AMINE                                             | -0.8851612 | 0.7105263  | 8.37E-01 | 1 |
| GO_NEGATIVE_REGULATION_OF_GENE_EXPRESSION_EPIGENETIC             | -0.8842898 | 0.7112676  | 8.38E-01 | 1 |
| SIRNA_EIF4GI_DN                                                  | -0.9148965 | 0.7114094  | 7.99E-01 | 1 |
| LIU_PROSTATE_CANCER_UP                                           | -0.897714  | 0.7133758  | 8.23E-01 | 1 |
| GO_CELLULAR_AMINO_ACID_METABOLIC_PROCESS                         | -0.9547308 | 0.71428573 | 7.41E-01 | 1 |
| BENPORATH_ES_CORE_NINE_CORRELATED                                | -0.914614  | 0.71428573 | 7.99E-01 | 1 |
| GO_ANAPHASE_PROMOTING_COMPLEX                                    | -0.8306508 | 0.71480143 | 8.99E-01 | 1 |
| WANG_RECURRENT_LIVER_CANCER_UP                                   | -0.8173037 | 0.7161716  | 9.13E-01 | 1 |
| LINDGREN_BLADDER_CANCER_CLUSTER_1_UP                             | -0.8901352 | 0.71710527 | 8.31E-01 | 1 |
| GO_GLUTATHIONE_PEROXIDASE_ACTIVITY                               | -0.814165  | 0.71779144 | 9.15E-01 | 1 |
| GO_TRANSFERASE_COMPLEX_TRANSFERRING_PHOSPHORUS_CONTAINING_GROUPS | -0.9130627 | 0.72       | 8.01E-01 | 1 |
| GO_HYDRO_LYASE_ACTIVITY                                          | -0.8295333 | 0.72       | 9.00E-01 | 1 |
| GO_PURINE_RIBONUCLEOSIDE_MONOPHOSPHATE_BIOSYNTHETIC_PROCESS      | -0.8488388 | 0.7206704  | 8.85E-01 | 1 |
| GO_G_PROTEIN_BETA_GAMMA_SUBUNIT_COMPLEX_BINDING                  | -0.8292369 | 0.7208481  | 9.00E-01 | 1 |
| SIMBULAN_PARP1_TARGETS_DN                                        | -0.8311207 | 0.7218543  | 9.00E-01 | 1 |

|                                                                                 |            |            |          |   |
|---------------------------------------------------------------------------------|------------|------------|----------|---|
| COLLIS_PRKDC_SUBSTRATES                                                         | -0.8420414 | 0.7222222  | 8.90E-01 | 1 |
| GO_POSITIVE_REGULATION_OF_MICROTUBULE_POLYMERIZATION_OR_DEPOLYMERIZATION        | -0.8255838 | 0.7227723  | 9.06E-01 | 1 |
| GO_HISTONE_KINASE_ACTIVITY                                                      | -0.821733  | 0.7235495  | 9.11E-01 | 1 |
| ODONNELL_METASTASIS_DN                                                          | -0.8221453 | 0.7238806  | 9.10E-01 | 1 |
| GO_SIN3_TYPE_COMPLEX                                                            | -0.7966982 | 0.724359   | 9.20E-01 | 1 |
| LIANG_HEMATOPOIESIS_STEM_CELL_NUMBER_LARGE_VS_TINY_DN                           | -0.8404982 | 0.72540987 | 8.92E-01 | 1 |
| GO_CYTOPLASMIC_MICROTUBULE_ORGANIZATION                                         | -0.8360848 | 0.7257384  | 8.96E-01 | 1 |
| JISON_SICKLE_CELL_DISEASE_DN                                                    | -0.9263365 | 0.72727275 | 7.84E-01 | 1 |
| GO_POST_TRANSLATIONAL_PROTEIN_MODIFICATION                                      | -0.8368437 | 0.72727275 | 8.95E-01 | 1 |
| GO_POSITIVE_REGULATION_OF_TOR_SIGNALING                                         | -0.8099793 | 0.72757477 | 9.18E-01 | 1 |
| GO_PROTON_TRANSPORTING_TWO_SECTOR_ATPASE_COMPLEX                                | -0.8460109 | 0.7276596  | 8.89E-01 | 1 |
| KEGG_ARGININE_AND_PROLINE_METABOLISM                                            | -0.8710758 | 0.73134327 | 8.58E-01 | 1 |
| GO_REGULATION_OF_OXIDATIVE_STRESS_INDUCED_INTRINSIC_APOPTOTIC_SIGNALING_PATHWAY | -0.8386444 | 0.73134327 | 8.93E-01 | 1 |
| GO_DEFENSE_RESPONSE_TO_FUNGUS                                                   | -0.8095771 | 0.7316176  | 9.17E-01 | 1 |
| GO_ROUGH_ENDOPLASMIC_RETICULUM_MEMBRANE                                         | -0.8313869 | 0.73355263 | 9.00E-01 | 1 |
| SETLUR_PROSTATE_CANCER_TM_PRSS2_ERG_FUSION_DN                                   | -0.8117413 | 0.7356688  | 9.17E-01 | 1 |
| HASLINGER_B_CLL_WITH_6Q21_DELETION                                              | -0.821668  | 0.7361111  | 9.10E-01 | 1 |
| REACTOME_G_BETA_GAMMA_SIGNALING_THROUGH_PI3KGAMMA                               | -0.8516986 | 0.73630136 | 8.82E-01 | 1 |
| GO_BAF_TYPE_COMPLEX                                                             | -0.784398  | 0.73770493 | 9.28E-01 | 1 |
| GO_MICROTUBULE_BASED_MOVEMENT                                                   | -0.9103096 | 0.73913044 | 8.06E-01 | 1 |
| GO_B_CELL_DIFFERENTIATION                                                       | -0.8760171 | 0.73913044 | 8.49E-01 | 1 |
| GO_DENDRITIC_SPINE_DEVELOPMENT                                                  | -0.7846935 | 0.7404844  | 9.28E-01 | 1 |
| GO_REGULATION_OF_PROTEIN_IMPORT_INTO_NUCLEUS_TRANSLLOCATION                     | -0.8091721 | 0.74113476 | 9.18E-01 | 1 |
| GO_SPINDLE_POLE                                                                 | -0.886024  | 0.7421875  | 8.36E-01 | 1 |

|                                                                           |            |            |          |   |
|---------------------------------------------------------------------------|------------|------------|----------|---|
| GO_SALIVARY_GLAND_DEVELOPMENT                                             | -0.8529367 | 0.74319065 | 8.81E-01 | 1 |
| GO_REGULATION_OF_UBIQUITIN_PROTEIN_LIGASE_ACTIVITY                        | -0.8308933 | 0.7434211  | 9.00E-01 | 1 |
| GO_BRANCHING_INVOLVED_IN_URETERIC_BUD_MORPHOGENESIS                       | -0.8449874 | 0.74407583 | 8.88E-01 | 1 |
| GO_NEGATIVE_REGULATION_OF_EPITHELIAL_CELL_APOPTOTIC_PROCESS               | -0.8440724 | 0.7440945  | 8.89E-01 | 1 |
| REACTOME_PLATELET_SENSITIZATION_BY_LDL                                    | -0.7865008 | 0.7458194  | 9.28E-01 | 1 |
| GO_REGULATION_OF_VASCULAR_ENDOTHELIAL_GROWTH_FACTOR_PRODUCTION            | -0.8237191 | 0.7468355  | 9.09E-01 | 1 |
| REACTOME_HOST_INTERACTIONS_OF_HIV_FACTORS                                 | -0.8794484 | 0.7473684  | 8.45E-01 | 1 |
| GO_RESPONSE_TO_PROTOZOAN                                                  | -0.8066885 | 0.74825174 | 9.18E-01 | 1 |
| GO_PROTEIN_TARGETING                                                      | -0.8811938 | 0.75       | 8.43E-01 | 1 |
| PID_CONE_PATHWAY                                                          | -0.7859141 | 0.75       | 9.27E-01 | 1 |
| KIM_MYCL1_AMPLIFICATION_TARGETS_DN                                        | -0.8127889 | 0.7507987  | 9.16E-01 | 1 |
| GO_RESPONSE_TO_ISCHEMIA                                                   | -0.8151467 | 0.75088966 | 9.14E-01 | 1 |
| GO_1_PHOSPHATIDYLINOSITOL_BINDING                                         | -0.793592  | 0.75185186 | 9.22E-01 | 1 |
| KEGG_TASTE_TRANSDUCTION                                                   | -0.8183845 | 0.75298804 | 9.12E-01 | 1 |
| HADDAD_B_LYMPHOCYTE_PROGENITOR                                            | -0.9275683 | 0.754717   | 7.83E-01 | 1 |
| BOGNI_TREATMENT_RELATED_MYELOID_LEUKEMIA_UP                               | -0.811321  | 0.754717   | 9.17E-01 | 1 |
| GO_ASPARTATE_FAMILY_AMINO_ACID_CATABOLIC_PROCESS                          | -0.7988972 | 0.75609756 | 9.21E-01 | 1 |
| GO_REGULATION_OF_LONG_TERM_SYNAPTIC_POTENTIATION                          | -0.7729634 | 0.7594502  | 9.37E-01 | 1 |
| GO_DNA_INTEGRITY_CHECKPOINT                                               | -0.8651409 | 0.76086956 | 8.67E-01 | 1 |
| REACTOME_LATENT_INFECTION_OF_HOMO_SAPIENS_WITH_MYCOBACTERIUM_TUBERCULOSIS | -0.8186998 | 0.76119405 | 9.13E-01 | 1 |
| ROSS_AML_WITH_AML1_ETOFUSION                                              | -0.8809922 | 0.7615894  | 8.43E-01 | 1 |
| YAO_TEMPORAL_RESPONSE_TO_PROGESTERONE_CLUSTER_12                          | -0.8892199 | 0.76282054 | 8.32E-01 | 1 |
| REACTOME_GLUCAGON_TYPE_II_GAND_RECEPTORS                                  | -0.8259562 | 0.7637795  | 9.06E-01 | 1 |
| GO_PROTEIN_KINASE_A_BINDING                                               | -0.8376834 | 0.7644628  | 8.94E-01 | 1 |
| TERAMOTO_OPN_TARGETS_CLUSTER_6                                            | -0.7942579 | 0.76447874 | 9.22E-01 | 1 |

|                                                                  |            |            |          |   |
|------------------------------------------------------------------|------------|------------|----------|---|
| CHIN_BREAST_CANCER_COPY_NUMBER UP                                | -0.7868152 | 0.76512456 | 9.28E-01 | 1 |
| GO_VENTRICULAR_CARDIAC_MUSCLE_CELL_DIFFERENTIATION               | -0.805913  | 0.7664671  | 9.18E-01 | 1 |
| ZHAN_MULTIPLE_MYELOMA_HP_UP                                      | -0.8317564 | 0.7707317  | 9.00E-01 | 1 |
| MOOTHA_GLYCOLYSIS                                                | -0.8008851 | 0.7708333  | 9.20E-01 | 1 |
| GO_REGULATION_OF_ATPASE_ACTIVITY                                 | -0.8600767 | 0.7719298  | 8.73E-01 | 1 |
| GO_POSITIVE_REGULATION_OF_CELLULAR_AMIDE_METABOLIC_PROCESS       | -0.8606357 | 0.7723577  | 8.74E-01 | 1 |
| VILIMAS_NOTCH1_TARGETS_DN                                        | -0.7898917 | 0.7733333  | 9.24E-01 | 1 |
| GO_REGULATION_OF_HYDROGEN_PEROXIDE_INDUCED_CELL_DEATH            | -0.7737773 | 0.7733333  | 9.38E-01 | 1 |
| GO_POSITIVE_REGULATION_OF_ERYTHROCYTE_DIFFERENTIATION            | -0.7700993 | 0.7746479  | 9.40E-01 | 1 |
| GO_CARDIAC_VENTRICLE_MORPHOGENESIS                               | -0.8665441 | 0.77472526 | 8.67E-01 | 1 |
| HU_GENOTOXIN_ACTION_DIRECT_VS_INDIRECT_24HR                      | -0.8436702 | 0.7751196  | 8.89E-01 | 1 |
| GO_CARBOXY_LYASE_ACTIVITY                                        | -0.8086726 | 0.7762557  | 9.18E-01 | 1 |
| GO_OXIDOREDUCTASE_ACTIVITY_ACTING_ON_NADPH                       | -0.8595109 | 0.7763158  | 8.74E-01 | 1 |
| GO_POSITIVE_REGULATION_OF_DNA_TEMPLATED_TRANSCRIPTION_ELONGATION | -0.7970719 | 0.77740866 | 9.21E-01 | 1 |
| WIKMAN_ASBESTOS_LUNG_CANCER_UP                                   | -0.7733496 | 0.7788779  | 9.38E-01 | 1 |
| FERNANDEZ_BOUND_BY_MYC                                           | -0.913893  | 0.7794118  | 8.00E-01 | 1 |
| BIOCARTA_G2_PATHWAY                                              | -0.8024378 | 0.7804878  | 9.18E-01 | 1 |
| GO_REGULATION_OF_ENDOTHELIAL_CELL_APOPTOTIC_PROCESS              | -0.8249611 | 0.78099173 | 9.07E-01 | 1 |
| GO_NUCLEAR_OUTER_MEMBRANE                                        | -0.7649796 | 0.781362   | 9.41E-01 | 1 |
| CREIGHTON_AKT1_SIGNALING_VIA_MTOR_DN                             | -0.7806634 | 0.7820069  | 9.30E-01 | 1 |
| REACTOME_CITRIC_ACID_CYCLE_TCA_CYCLE                             | -0.8046392 | 0.78305084 | 9.18E-01 | 1 |
| CHOI_ATL_CHRONIC_VS_ACUTE_DN                                     | -0.7776275 | 0.78504676 | 9.34E-01 | 1 |
| REACTOME_AMINE_LIGAND_BINDING_RECEPTORS                          | -0.7938229 | 0.7854406  | 9.22E-01 | 1 |
| LANG_MYB_FAMILY_TARGETS                                          | -0.8051737 | 0.78600824 | 9.18E-01 | 1 |

|                                                                               |            |            |          |   |
|-------------------------------------------------------------------------------|------------|------------|----------|---|
| WANG_RESPONSE_TO_ANDROGEN UP                                                  | -0.8153112 | 0.7867647  | 9.14E-01 | 1 |
| GO_REGULATION_OF_HEART_MORPHOGENESIS                                          | -0.7996212 | 0.7869416  | 9.20E-01 | 1 |
| TOMIDA_METASTASIS_UP                                                          | -0.7770119 | 0.7883212  | 9.34E-01 | 1 |
| CROMER_METASTASIS_UP                                                          | -0.865523  | 0.79113925 | 8.67E-01 | 1 |
| GO_HISTONE_METHYLTRANSFERASE_ACTIVITY                                         | -0.8184821 | 0.7916667  | 9.12E-01 | 1 |
| MOOTHA_TCA                                                                    | -0.7241259 | 0.79288024 | 9.56E-01 | 1 |
| GAJATE_RESPONSE_TO TRABECTEDIN DN                                             | -0.7524573 | 0.7937063  | 9.47E-01 | 1 |
| GO_PURINE_NUCLEOSIDE_MONOPHOSPHATE_BIOSYNTHETIC_PROCESS                       | -0.8397824 | 0.7945946  | 8.92E-01 | 1 |
| GO_CARDIAC_ATRIUM_DEVELOPMENT                                                 | -0.8007734 | 0.79577464 | 9.20E-01 | 1 |
| GO_PROTEIN_DISULFIDE_OXIDOREDUCTASE_ACTIVITY                                  | -0.773277  | 0.79710144 | 9.37E-01 | 1 |
| GO_POSITIVE_REGULATION_OF_CELL_CYCLE_PHASE_TRANSITION                         | -0.8499845 | 0.7987805  | 8.84E-01 | 1 |
| GO_1_PHOSPHATIDYLINOSITOL_3_KINASE_ACTIVITY                                   | -0.7935411 | 0.7991453  | 9.21E-01 | 1 |
| GO_INTRASPECIES_INTERACTION_BETWEEN_ORGANISMS                                 | -0.7979684 | 0.8008658  | 9.21E-01 | 1 |
| GO_GLUCOSAMINE_CONTAINING_COMPOUND_METABOLIC_PROCESS                          | -0.7704676 | 0.8014184  | 9.40E-01 | 1 |
| SHIPP_DLBCL_CURED_VS_FATAL DN                                                 | -0.8075364 | 0.80172414 | 9.17E-01 | 1 |
| REACTOME_APOPTOTIC_EXECUTION_PHASE                                            | -0.808225  | 0.80225986 | 9.16E-01 | 1 |
| BREDEMEYER_RAG_SIGNALING_VIA_ATM_NOT_VIA_NFKB DN                              | -0.8106121 | 0.8028674  | 9.17E-01 | 1 |
| ZHAN_MULTIPLE_MYELOMA_CD1_AND_CD2_UP                                          | -0.8458896 | 0.8044693  | 8.88E-01 | 1 |
| GO_NEGATIVE_REGULATION_OF_PRODUCTION_OF_MOLECULAR_MEDIATOR_OF_IMMUNE_RESPONSE | -0.7924258 | 0.80536914 | 9.22E-01 | 1 |
| CAFFAREL_RESPONSE_TO_THC_UP                                                   | -0.7852768 | 0.80658436 | 9.28E-01 | 1 |
| KEGG_TRYPTOPHAN_METABOLISM                                                    | -0.806407  | 0.8067633  | 9.18E-01 | 1 |
| GO_THREONINE_TYPE_PEPTIDASE_ACTIVITY                                          | -0.7638182 | 0.8074074  | 9.42E-01 | 1 |
| IIZUKA_LIVER_CANCER_PROGRESSION L0 L1 DN                                      | -0.7573868 | 0.80921054 | 9.43E-01 | 1 |



|                                                                              |            |            |          |   |
|------------------------------------------------------------------------------|------------|------------|----------|---|
| YAO_TEMPORAL_RESPONSE_TO_PROGESTERONE_CLUSTER_17                             | -0.9173607 | 0.8095238  | 7.97E-01 | 1 |
| GO_CHROMATIN_SILENCING_AT_RDNA                                               | -0.7969824 | 0.8106996  | 9.20E-01 | 1 |
| GO_PREASSEMBLY_OF_GPI_ANCHOR_IN_ER_MEMBRANE                                  | -0.7492374 | 0.81333333 | 9.47E-01 | 1 |
| GO_NUCLEAR_MATRIX                                                            | -0.8544538 | 0.8148148  | 8.79E-01 | 1 |
| GO_POSITIVE_REGULATION_OF_TELOMERE_CAPPING                                   | -0.7257748 | 0.8149351  | 9.59E-01 | 1 |
| YANG_BREAST_CANCER_ESR1_UP                                                   | -0.7566019 | 0.81526107 | 9.43E-01 | 1 |
| BOYLAN_MULTIPLE_MYELOMA_DOWN                                                 | -0.8346379 | 0.8154762  | 8.98E-01 | 1 |
| GO_SUBSTANTIA_NIGRA_DEVELOPMENT                                              | -0.8124504 | 0.8161435  | 9.16E-01 | 1 |
| GO_REGULATION_OF_INTRINSIC_APOPTOTIC_SIGNALING_PATHWAY_BY_P53_CLASS_MEDIATOR | -0.7574559 | 0.8167939  | 9.44E-01 | 1 |
| DACOSTA_UV_RESPONSE_VIA_ERCC3_XPCS_DN                                        | -0.8595024 | 0.81714284 | 8.73E-01 | 1 |
| GO_STEROID_CATABOLIC_PROCESS                                                 | -0.7670477 | 0.81877023 | 9.41E-01 | 1 |
| GO_TRANSFERASE_ACTIVITY_TRANSFERRING_SULFUR_CONTAINING_GROUPS                | -0.8082877 | 0.8199052  | 9.17E-01 | 1 |
| GO_AXONAL_GROWTH_CONE                                                        | -0.7502575 | 0.82274246 | 9.48E-01 | 1 |
| KEGG_GLYCOSYLPHOSPHATIDYL_INOSITOL_GPI_ANCHOR_BIOSYNTHESIS                   | -0.7659631 | 0.8228347  | 9.41E-01 | 1 |
| POMEROY_MEDULLOBLASTOMA_DESMOPLASIC_VS_CLASSIC_DN                            | -0.8082469 | 0.8229167  | 9.17E-01 | 1 |
| GO_POSITIVE_REGULATION_OF_DNA_BINDING                                        | -0.7904769 | 0.8240741  | 9.24E-01 | 1 |
| GO_MACROMOLECULE_METHYLATION                                                 | -0.8921526 | 0.82417583 | 8.30E-01 | 1 |
| GO_REGULATION_OF_INTRACELLULAR_ESTROGEN_RECEPTOR_SIGNALING_PATHWAY           | -0.7183809 | 0.8245033  | 9.59E-01 | 1 |
| GO_HEPARAN_SULFATE_PROTEOGLYCAN_BIOSYNTHETIC_PROCESS                         | -0.7618841 | 0.82481754 | 9.43E-01 | 1 |
| HWANG_PROSTATE_CANCER_MARKERS                                                | -0.7523205 | 0.8262712  | 9.47E-01 | 1 |
| GO_PEPTIDYL_ASPARAGINE_MODIFICATION                                          | -0.7962163 | 0.8262911  | 9.20E-01 | 1 |
| GO_PYRIMIDINE_RIBONUCLEOSIDE_METABOLIC_PROCESS                               | -0.7605095 | 0.82733816 | 9.44E-01 | 1 |

|                                                      |            |            |          |   |
|------------------------------------------------------|------------|------------|----------|---|
| BILANGES_SERUM_SENSITIVE_VIA_TSC2                    | -0.787223  | 0.82758623 | 9.28E-01 | 1 |
| GO_TRANSCRIPTION_FROM_RNA_POLYMERASE_I_PROMOTER      | -0.8044558 | 0.8278689  | 9.18E-01 | 1 |
| GO_MATING                                            | -0.8042654 | 0.8286853  | 9.17E-01 | 1 |
| GO_SOCIAL_BEHAVIOR                                   | -0.7824577 | 0.82905984 | 9.30E-01 | 1 |
| LU_AGING_BRAIN_DN                                    | -0.8575985 | 0.82954544 | 8.75E-01 | 1 |
| REACTOME_REGULATION_OF_BETA_CELL_DEVELOPMENT         | -0.7402564 | 0.83157897 | 9.51E-01 | 1 |
| GO_2_OXOGLUTARATE_METABOLIC_PROCESS                  | -0.7604244 | 0.83333333 | 9.43E-01 | 1 |
| GO_GABA_RECEPTOR_ACTIVITY                            | -0.7431499 | 0.83333333 | 9.50E-01 | 1 |
| LEE_INTRATHYMIC_T_PROGENITOR                         | -0.7394155 | 0.8344827  | 9.51E-01 | 1 |
| GO_CRANIAL_SKELETAL_SYSTEM_DEVELOPMENT               | -0.8037892 | 0.83516484 | 9.18E-01 | 1 |
| GO_NEURON_PROJECTION_MEMBRANE                        | -0.7616358 | 0.8367347  | 9.43E-01 | 1 |
| GO_NUCLEAR_TRANSPORT                                 | -0.9016092 | 0.84       | 8.18E-01 | 1 |
| BOYALT_LIVER_CANCER_SUBCLASS_G2                      | -0.7249384 | 0.84016395 | 9.58E-01 | 1 |
| GO_NUCLEAR_ENVELOPE_ORGANIZATION                     | -0.8160899 | 0.8414634  | 9.14E-01 | 1 |
| GO_ESTABLISHMENT_OF_MITOTIC_SPINDLE_ORIENTATION      | -0.7179192 | 0.8414634  | 9.59E-01 | 1 |
| BIOCARTA_CELLCYCLE_PATHWAY                           | -0.7663155 | 0.84210527 | 9.41E-01 | 1 |
| PENG_Glutamine_Deprivation_Up                        | -0.7666885 | 0.8425926  | 9.41E-01 | 1 |
| PARK_HSC_MARKERS                                     | -0.7958894 | 0.84304935 | 9.20E-01 | 1 |
| GO_NEGATIVE_REGULATION_OF_MITOCHONDRION_ORGANIZATION | -0.7720817 | 0.8436214  | 9.38E-01 | 1 |
| REACTOME_G1_PHASE                                    | -0.7680176 | 0.8468468  | 9.41E-01 | 1 |
| GO_MEDIATOR_COMPLEX                                  | -0.749785  | 0.8471761  | 9.47E-01 | 1 |
| GO_PIGMENT_GRANULE_ORGANIZATION                      | -0.7114602 | 0.84829724 | 9.58E-01 | 1 |
| GO_ORGAN_FORMATION                                   | -0.7685899 | 0.84836066 | 9.40E-01 | 1 |
| REACTOME_TIE2_SIGNALING                              | -0.7172365 | 0.84876543 | 9.57E-01 | 1 |
| DARWICHE_SKIN_TUMOR_PROMOTER_DN                      | -0.8939577 | 0.8488372  | 8.26E-01 | 1 |
| TERAO_AOX4_TARGETS_SKIN_UP                           | -0.7811093 | 0.8495575  | 9.30E-01 | 1 |
| GO_REGULATION_OF_OXIDATIVE_STRESS_INDUCED_CELL_DEATH | -0.7943916 | 0.85       | 9.22E-01 | 1 |

|                                                                  |            |            |          |   |
|------------------------------------------------------------------|------------|------------|----------|---|
| KEGG_GLYCINE_SERINE_AND_THREONINE_METABOLISM                     | -0.7631417 | 0.85020244 | 9.42E-01 | 1 |
| REACTOME_REGULATORY_RNA_PATHWAYS                                 | -0.7596868 | 0.8503401  | 9.43E-01 | 1 |
| GO_AMINO_ACID_BINDING                                            | -0.8342078 | 0.8518519  | 8.97E-01 | 1 |
| CHEMELLO_SOLEUS_VS_EDL_MYOFIBERS_DN                              | -0.7079518 | 0.85303515 | 9.57E-01 | 1 |
| GO_MITOCHONDRIAL_GENOME_MAINTENANCE                              | -0.7318118 | 0.8556701  | 9.57E-01 | 1 |
| ENK_UV_RESPONSE_KERATINOCYTE_DN                                  | -0.9171802 | 0.85714287 | 7.97E-01 | 1 |
| GO_REGULATION_OF_RESPONSE_TO_DNA_DAMAGE_STIMULUS                 | -0.8388466 | 0.85714287 | 8.93E-01 | 1 |
| GO_REGULATION_OF_LONG_TERM_NEURONAL_SYNAPTIC_PLASTICITY          | -0.7400788 | 0.85714287 | 9.51E-01 | 1 |
| GROSS_ELK3_TARGETS_UP                                            | -0.7426646 | 0.85877866 | 9.50E-01 | 1 |
| GO_SULFUR_COMPOUND_CATABOLIC_PROCESS                             | -0.7580162 | 0.8596491  | 9.44E-01 | 1 |
| HAHTOLA_MYCOSIS_FUNGOIDES_SKIN_UP                                | -0.8769974 | 0.86021507 | 8.48E-01 | 1 |
| WONG_PROTEASOME_GENE_MODULE                                      | -0.7756536 | 0.861244   | 9.36E-01 | 1 |
| GO_PROTEIN_K63_LINKED_DEUBIQUITINATION                           | -0.7175742 | 0.8615917  | 9.58E-01 | 1 |
| GO_Glutamine_FAMILY_Amino_AcID_CATABOLIC_PROCESS                 | -0.7245157 | 0.86206895 | 9.56E-01 | 1 |
| GO_ESTABLISHMENT_OF_LOCALIZATION_BY_MOVEMENT_ALONG_MICROTUBULE   | -0.8193475 | 0.8652482  | 9.13E-01 | 1 |
| GO_SYNAPSE_ASSEMBLY                                              | -0.8057369 | 0.8652482  | 9.18E-01 | 1 |
| GO_REGULATION_OF_CENTROSOME_DUPLICATION                          | -0.7421605 | 0.86538464 | 9.50E-01 | 1 |
| REACTOME_PYRUVATE_METABOLISM_AND_CITRIC_ACID_TCA_CYCLE           | -0.7592138 | 0.8656126  | 9.43E-01 | 1 |
| GO_REGULATION_OF_CELL_CYCLE_G2_M_PHASE_TRANSITION                | -0.7928028 | 0.8666667  | 9.22E-01 | 1 |
| GO_NEGATIVE_REGULATION_OF_MRNA_METABOLIC_PROCESS                 | -0.7258114 | 0.8684211  | 9.59E-01 | 1 |
| GO_ENERGY_COUPLED_PROTON_TRANSPORT_DOWN_ELECTROCHEMICAL_GRADIENT | -0.7487481 | 0.86868685 | 9.46E-01 | 1 |
| GO_POSITIVE_REGULATION_OF_MUSCLE_CELL_DIFFERENTIATION            | -0.8096399 | 0.8689655  | 9.18E-01 | 1 |
| BROWNE_HCMV_INFECTION_18HR_UP                                    | -0.8632621 | 0.8701299  | 8.70E-01 | 1 |

|                                                                                                               |            |            |          |   |
|---------------------------------------------------------------------------------------------------------------|------------|------------|----------|---|
| COLLIS_PRKDC_REGULATORS                                                                                       | -0.7127382 | 0.8703704  | 9.59E-01 | 1 |
| REACTOME_PROSTACYCLIN_SIG<br>NALLING_THROUGH_PROSTACYC<br>LIN_RECEPTOR                                        | -0.750653  | 0.87096775 | 9.48E-01 | 1 |
| KARAKAS_TGFB1_SIGNALING                                                                                       | -0.6932972 | 0.87108016 | 9.62E-01 | 1 |
| GO_LIVER_REGENERATION                                                                                         | -0.7229449 | 0.87205386 | 9.56E-01 | 1 |
| GO_PROTEIN_K48_LINKED_DEUBI<br>QUITINATION                                                                    | -0.7097445 | 0.8731884  | 9.58E-01 | 1 |
| BIOCARTA_VEGF_PATHWAY                                                                                         | -0.7158669 | 0.8736462  | 9.57E-01 | 1 |
| GO_ARACHIDONIC_ACID_METAB<br>OLIC_PROCESS                                                                     | -0.7231215 | 0.8745098  | 9.56E-01 | 1 |
| GO_POSITIVE_REGULATION_OF_<br>DENDRITE_MORPHOGENESIS                                                          | -0.7176077 | 0.8745387  | 9.59E-01 | 1 |
| BILANGES_RAPAMYCIN_SENSITIV<br>E_GENES                                                                        | -0.7516158 | 0.875969   | 9.47E-01 | 1 |
| ZHAN_EARLY_DIFFERENTIATION_<br>GENES_DN                                                                       | -0.745842  | 0.8765432  | 9.48E-01 | 1 |
| HONRADO_BREAST_CANCER_BR<br>CA1_VS_BRCA2                                                                      | -0.7159293 | 0.8773585  | 9.57E-01 | 1 |
| GO_PERICENTRIOLAR_MATERIAL                                                                                    | -0.7116375 | 0.87741935 | 9.59E-01 | 1 |
| LEE_METASTASIS_AND_ALTERNA<br>TIVE_SPLICING_DN                                                                | -0.7662879 | 0.8780488  | 9.41E-01 | 1 |
| GO_ATP_SYNTHESIS_COUPLED_<br>PROTON_TRANSPORT                                                                 | -0.7246986 | 0.8782288  | 9.57E-01 | 1 |
| GO_REGULATION_OF_OLIGODEN<br>DROCYTE_DIFFERENTIATION                                                          | -0.7568006 | 0.87903225 | 9.43E-01 | 1 |
| GO_REGULATION_OF_SIGNAL_TR<br>ANSDUCTION_BY_P53_CLASS_ME<br>DIATOR                                            | -0.8516398 | 0.88       | 8.81E-01 | 1 |
| GO_PHOSPHOTRANSFERASE_AC<br>TIVITY_PHOSPHATE_GROUP_AS_<br>ACCEPTOR                                            | -0.7440329 | 0.8803419  | 9.50E-01 | 1 |
| GO_REGULATION_OF_PROTEIN_<br>UBIQUITINATION_INVOLVED_IN_U<br>BIQUITIN_DEPENDENT_PROTEIN_<br>CATABOLIC_PROCESS | -0.7974263 | 0.88095236 | 9.21E-01 | 1 |
| GO_FIBROBLAST_GROWTH_FACT<br>OR_RECEPTOR_SIGNALING_PAT<br>HWAY                                                | -0.7901519 | 0.8817734  | 9.24E-01 | 1 |
| COLDREN_GEFITINIB_RESISTANC<br>E_UP                                                                           | -0.7864883 | 0.88268155 | 9.27E-01 | 1 |
| KEGG_OOCYTE_MEIOSIS                                                                                           | -0.8187786 | 0.8833333  | 9.13E-01 | 1 |
| GO_SULFOTRANSFERASE_ACTIVI<br>TY                                                                              | -0.7692697 | 0.8833333  | 9.40E-01 | 1 |
| GO_REGULATION_OF_HEAT_GEN<br>ERATION                                                                          | -0.681523  | 0.8833922  | 9.67E-01 | 1 |

|                                                                                    |            |            |          |   |
|------------------------------------------------------------------------------------|------------|------------|----------|---|
| GO_REGULATION_OF_MRNA_METABOLIC_PROCESS                                            | -0.8112024 | 0.8851351  | 9.17E-01 | 1 |
| PROVENZANI_METASTASIS_UP                                                           | -0.8530175 | 0.8875     | 8.82E-01 | 1 |
| FERRANDO_LYL1_NEIGHBORS                                                            | -0.6536694 | 0.888535   | 9.77E-01 | 1 |
| GO_NCRNA_CATABOLIC_PROCESSES                                                       | -0.6941038 | 0.89       | 9.63E-01 | 1 |
| GO_TRANSFERASE_ACTIVITY_TRANSFERRING_ONE_CARBON_GROUPS                             | -0.8405846 | 0.8913044  | 8.92E-01 | 1 |
| JEON_SMAD6_TARGETS_DN                                                              | -0.657792  | 0.8913044  | 9.75E-01 | 1 |
| GO_NEGATIVE_REGULATION_OF_ANION_TRANSPORT                                          | -0.7305062 | 0.8921933  | 9.57E-01 | 1 |
| GO_REGULATION_OF_SULFUR_METABOLIC_PROCESS                                          | -0.708476  | 0.8923611  | 9.58E-01 | 1 |
| GO_PROTEIN_IMPORT                                                                  | -0.8380375 | 0.89361703 | 8.94E-01 | 1 |
| HOLLMANN_APOPTOSIS_VIA_CD40_UP                                                     | -0.8590542 | 0.8947368  | 8.73E-01 | 1 |
| GO_POSITIVE_REGULATION_OF_MYOBLAST_DIFFERENTIATION                                 | -0.6748395 | 0.8947368  | 9.67E-01 | 1 |
| GO_REGULATION_OF_COFACTOR_METABOLIC_PROCESS                                        | -0.7601572 | 0.8962264  | 9.43E-01 | 1 |
| PID_DNA_PK_PATHWAY                                                                 | -0.6256448 | 0.89666665 | 9.83E-01 | 1 |
| SYED ESTRADIOL_RESPONSE                                                            | -0.6784751 | 0.8980263  | 9.65E-01 | 1 |
| GO_RESPONSE_TO_LITHIUM_ION                                                         | -0.698716  | 0.900369   | 9.62E-01 | 1 |
| GO_POSITIVE_REGULATION_OF_PATHWAY_RESTRICTED_SMAD_PROTEIN_PHOSPHORYLATION          | -0.7403895 | 0.90338165 | 9.52E-01 | 1 |
| GO_MITOTIC_CYTOKINESIS                                                             | -0.7205812 | 0.90384614 | 9.57E-01 | 1 |
| GO_CHROMATIN_SILENCING                                                             | -0.7820889 | 0.9041916  | 9.30E-01 | 1 |
| GO_MITOTIC_DNA_INTEGRITY_CHECKPOINT                                                | -0.8006574 | 0.9044586  | 9.19E-01 | 1 |
| REACTOME_INHIBITION_OF_VOLTAGE_GATED_CA2_CHANNELS_VIA_GBETA_GAMMA_SUBUNITS         | -0.6838661 | 0.90612245 | 9.67E-01 | 1 |
| BERNARD_PPAPDC1B_TARGETS_UP                                                        | -0.7263894 | 0.9068826  | 9.60E-01 | 1 |
| ONDER_CDH1_TARGETS_1_DN                                                            | -0.7987309 | 0.90697676 | 9.20E-01 | 1 |
| GO_POSITIVE_REGULATION_OF_CYTOKINESIS                                              | -0.7136542 | 0.90816325 | 9.58E-01 | 1 |
| GO_REGULATION_OF_COENZYME_METABOLIC_PROCESS                                        | -0.7388401 | 0.90909094 | 9.51E-01 | 1 |
| GO_CYTOKINE_SECRETION                                                              | -0.7100778 | 0.90909094 | 9.58E-01 | 1 |
| GO_MODULATION_OF_TRANSCRIPTION_IN_OTHER_ORGANISM_INVOLVED_IN_SYMBIOTIC_INTERACTION | -0.6856753 | 0.9096573  | 9.66E-01 | 1 |
| NAKAJIMA_MAST_CELL                                                                 | -0.7396715 | 0.9116279  | 9.51E-01 | 1 |

|                                                                              |            |            |          |   |
|------------------------------------------------------------------------------|------------|------------|----------|---|
| PLASARI_TGFB1_SIGNALING_VIA_NFIC_10HR_DN                                     | -0.6830887 | 0.9166667  | 9.67E-01 | 1 |
| GO_REGULATION_OF_ORGAN_FORMATION                                             | -0.7093431 | 0.91698116 | 9.58E-01 | 1 |
| GO_DENDRITIC_SPINE_ORGANIZATION                                              | -0.6516417 | 0.9179811  | 9.77E-01 | 1 |
| MARTINEZ_RESPONSE_TO TRABECTEDIN                                             | -0.7124003 | 0.9182692  | 9.58E-01 | 1 |
| GO_PROTEASOME_CORE_COMPLEX                                                   | -0.708509  | 0.91851854 | 9.58E-01 | 1 |
| JOHNSTONE_PARVB_TARGETS_2_DN                                                 | -0.9025885 | 0.9189189  | 8.17E-01 | 1 |
| GO_POSITIVE_REGULATION_OF_PROTEIN_ACETYLATION                                | -0.6987239 | 0.920354   | 9.62E-01 | 1 |
| GO_POSITIVE_REGULATION_OF_COAGULATION                                        | -0.6356559 | 0.9204152  | 9.82E-01 | 1 |
| BIOCARTA_EIF4_PATHWAY                                                        | -0.6604916 | 0.92142856 | 9.74E-01 | 1 |
| BROWNE_HCMV_INFECTION_10HR_DN                                                | -0.7251856 | 0.9230769  | 9.58E-01 | 1 |
| GO_HISTONE_H3_K4_METHYLATION                                                 | -0.7039411 | 0.92779785 | 9.60E-01 | 1 |
| KAYO_AGING_MUSCLE_DN                                                         | -0.81536   | 0.928      | 9.15E-01 | 1 |
| PECE_MAMMARY_STEM_CELL_DN                                                    | -0.8085508 | 0.93043476 | 9.17E-01 | 1 |
| GO_PROTEIN_METHYLTRANSFERASE_ACTIVITY                                        | -0.7491784 | 0.9310345  | 9.46E-01 | 1 |
| FORTSCHEGGER_PHF8_TARGETS_UP                                                 | -0.8452629 | 0.9322034  | 8.89E-01 | 1 |
| JAERVINEN_AMPLIFIED_IN_LARYNGEAL_CANCER                                      | -0.6954978 | 0.9328358  | 9.63E-01 | 1 |
| GO_NEGATIVE_REGULATION_OF_STRIATED_MUSCLE_CELL_APOPTOTIC_PROCESS             | -0.6495369 | 0.93421054 | 9.77E-01 | 1 |
| GO_PROTEIN_HETEROTETRAMERIZATION                                             | -0.6978515 | 0.9351145  | 9.62E-01 | 1 |
| GO_TRANSCRIPTION_ELONGATION_FACTOR_COMPLEX                                   | -0.6918101 | 0.9391304  | 9.63E-01 | 1 |
| ICHIBA_GRAFT_VERSUS_HOST_DISEASE_35D_DN                                      | -0.6872164 | 0.9402391  | 9.65E-01 | 1 |
| REACTOME_REGULATION_OF_MRNA_STABILITY_BY_PROTEINS_THAT_BIND_AU_RICH_ELEMENTS | -0.7527676 | 0.9402985  | 9.47E-01 | 1 |
| GO_ALPHA_AMINO_ACID_BIOSYNTHETIC_PROCESS                                     | -0.7237854 | 0.94219655 | 9.56E-01 | 1 |
| GO_POSITIVE_REGULATION_OF_EXTRACELLULAR_MATRIX_ORGANIZATION                  | -0.6311166 | 0.9433333  | 9.83E-01 | 1 |

|                                                                                  |            |            |          |   |
|----------------------------------------------------------------------------------|------------|------------|----------|---|
| REACTOME_REGULATION_OF_OR<br>NITHINE_DECARBOXYLASE_ODC                           | -0.7254921 | 0.94358975 | 9.58E-01 | 1 |
| GO_SEX_CHROMOSOME                                                                | -0.6517413 | 0.94716984 | 9.77E-01 | 1 |
| GO_ORGANELLE_ASSEMBLY                                                            | -0.8569128 | 0.94736844 | 8.75E-01 | 1 |
| HALLMARK_MTORC1_SIGNALING                                                        | -0.8443888 | 0.94827586 | 8.89E-01 | 1 |
| GO_INTRINSIC_COMPONENT_OF<br>MITOCHONDRIAL_OUTER_MEMBR<br>ANE                    | -0.6472899 | 0.9498328  | 9.78E-01 | 1 |
| GO_CHROMATIN                                                                     | -0.816376  | 0.95       | 9.14E-01 | 1 |
| GO_NEUROTRANSMITTER_META<br>BOLIC_PROCESS                                        | -0.6238766 | 0.9501661  | 9.82E-01 | 1 |
| LIAO_HAVE_SOX4_BINDING_SIT<br>ES                                                 | -0.690959  | 0.95022625 | 9.63E-01 | 1 |
| REACTOME_SIGNALING_BY_WNT                                                        | -0.7502098 | 0.95027626 | 9.47E-01 | 1 |
| GO_REGULATION_OF_TRANSCRI<br>PTION_ELONGATION_FROM_RNA<br>POLYMERASE_II_PROMOTER | -0.6268792 | 0.9506579  | 9.84E-01 | 1 |
| NGO_MALIGNANT_GLIOMA_1P_LO<br>H                                                  | -0.6171615 | 0.95076925 | 9.84E-01 | 1 |
| WENDT_COHESIN_TARGETS_UP                                                         | -0.6803105 | 0.9513109  | 9.67E-01 | 1 |
| JIANG_VHL_TARGETS                                                                | -0.717501  | 0.9516129  | 9.58E-01 | 1 |
| PID_E2F_PATHWAY                                                                  | -0.7310048 | 0.9520958  | 9.57E-01 | 1 |
| RAMASWAMY_METASTASIS_UP                                                          | -0.7299231 | 0.95238096 | 9.57E-01 | 1 |
| GO_POSITIVE_REGULATION_OF_<br>EMBRYONIC_DEVELOPMENT                              | -0.6423314 | 0.95289856 | 9.79E-01 | 1 |
| MOOHTA_FFA_OXYDATION                                                             | -0.5873634 | 0.9530686  | 9.88E-01 | 1 |
| SCHAEFFER_PROSTATE_DEVELO<br>PMENT_AND_CANCER_BOX4_DN                            | -0.6802801 | 0.95327103 | 9.66E-01 | 1 |
| GO_MICROTUBULE_NUCLEATION                                                        | -0.5965562 | 0.95333333 | 9.87E-01 | 1 |
| LEE_RECENT_THYMIC_EMIGRANT                                                       | -0.781205  | 0.9558824  | 9.31E-01 | 1 |
| HOEBEKE_LYMPHOID_STEM_CEL<br>L_DN                                                | -0.7262875 | 0.9559748  | 9.59E-01 | 1 |
| GO_SERINE_FAMILY_AMINO_ACID<br>METABOLIC_PROCESS                                 | -0.6682729 | 0.95614034 | 9.71E-01 | 1 |
| GO_LYASE_ACTIVITY                                                                | -0.7970607 | 0.95789474 | 9.21E-01 | 1 |
| GO_NEGATIVE_REGULATION_OF_<br>RESPONSE_TO_DNA_DAMAGE_S<br>TIMULUS                | -0.680288  | 0.9589041  | 9.66E-01 | 1 |
| REACTOME_DESTABILIZATION_O<br>F_MRNA_BY_AUF1_HNRNP_D0                            | -0.7030925 | 0.9593023  | 9.60E-01 | 1 |
| REACTOME_PKB_MEDIATED_EVE<br>NTS                                                 | -0.5821237 | 0.95970696 | 9.88E-01 | 1 |
| GO_NUCLEOSIDE_TRIPHOSPHAT<br>E_METABOLIC_PROCESS                                 | -0.7996321 | 0.96       | 9.20E-01 | 1 |

|                                                                        |            |            |          |   |
|------------------------------------------------------------------------|------------|------------|----------|---|
| GO_PROTEIN_TRANSPORTER_ACTIVITY                                        | -0.7337873 | 0.96       | 9.56E-01 | 1 |
| GO_CYCLIN_DEPENDENT_PROTEIN_SERINE_THREONINE_KINASE_REGULATOR_ACTIVITY | -0.62626   | 0.96113074 | 9.83E-01 | 1 |
| VANTVEER_BREAST_CANCER_METASTASIS_UP                                   | -0.6997255 | 0.9622642  | 9.62E-01 | 1 |
| WANG_IMMORTALIZED_BY_HOXA9_AND_MEIS1_DN                                | -0.627444  | 0.96245736 | 9.84E-01 | 1 |
| ZUCCHI_METASTASIS_UP                                                   | -0.6448492 | 0.9626168  | 9.79E-01 | 1 |
| GO_NUCLEOBASE_CONTAINING_COMPOUND_KINASE_ACTIVITY                      | -0.6665353 | 0.96313363 | 9.72E-01 | 1 |
| LIAN_NEUTROPHIL_GRANULE_COMPONENTS                                     | -0.6097557 | 0.9644013  | 9.84E-01 | 1 |
| BRIDEAU_IMPRINTED_GENES                                                | -0.7067962 | 0.96666664 | 9.58E-01 | 1 |
| RASHI_RESPONSE_TO_IONIZING_RADIATION_4                                 | -0.6797125 | 0.96713614 | 9.66E-01 | 1 |
| PID_INSULIN_GLUCCOSE_PATHWAY                                           | -0.5959137 | 0.9699248  | 9.86E-01 | 1 |
| GO_PHOSPHATIDYLINOSITOL_DEPHOSPHORYLATION                              | -0.5519799 | 0.9701987  | 9.90E-01 | 1 |
| GAUSSMANN_MLL_AF4_FUSION_TARGETS_F_DN                                  | -0.621331  | 0.97083336 | 9.83E-01 | 1 |
| JAIN_NFKB_SIGNALING                                                    | -0.711631  | 0.97282606 | 9.58E-01 | 1 |
| GO_NUCLEOTIDYLTRANSFERASE_ACTIVITY                                     | -0.7248815 | 0.973913   | 9.57E-01 | 1 |
| LI_DCP2_BOUND_MRNA                                                     | -0.6792536 | 0.9747899  | 9.66E-01 | 1 |
| GO_LYMPH_VESSEL_DEVELOPMENT                                            | -0.6135831 | 0.97651005 | 9.84E-01 | 1 |
| GO_PHOSPHOLIPID_DEPHOSPHORYLATION                                      | -0.5696701 | 0.977492   | 9.89E-01 | 1 |
| GO_REGULATION_OF_TRANSLATIONAL_INITIATION                              | -0.682565  | 0.9777778  | 9.66E-01 | 1 |
| GO_N_METHYLTRANSFERASE_ACTIVITY                                        | -0.6239571 | 0.9798995  | 9.83E-01 | 1 |
| GO_ORGANELLE_ENVELOPE_LUMEN                                            | -0.7174613 | 0.98013246 | 9.57E-01 | 1 |
| GO_POSITIVE_REGULATION_OF_GLIAL_CELL_DIFFERENTIATION                   | -0.6007378 | 0.9855596  | 9.86E-01 | 1 |
| HASLINGER_B CLL_WITH_CHROMOSOME_12_TRISOMY                             | -0.5722867 | 0.9858156  | 9.89E-01 | 1 |
| GO_NEGATIVE_REGULATION_OF_PROTEIN_ACETYLATION                          | -0.514703  | 0.98657715 | 9.91E-01 | 1 |
| GO_PEPTIDE_N_ACETYLTTRANSFERASE_ACTIVITY                               | -0.6127154 | 0.9872881  | 9.83E-01 | 1 |
| DACOSTA_UV_RESPONSE_VIA_ERCC3_XPCS_UP                                  | -0.4943273 | 0.9880952  | 9.91E-01 | 1 |



|                                                                                     |            |            |          |   |
|-------------------------------------------------------------------------------------|------------|------------|----------|---|
| GO_REGULATION_OF_MICROTUBULE_POLYMERIZATION_OR_DEPOLYMERIZATION                     | -0.7478449 | 0.9882353  | 9.47E-01 | 1 |
| GO_POSITIVE_REGULATION_OF_CELL_CYCLE_G1_S_PHASE_TRANSITION                          | -0.5616425 | 0.9894737  | 9.90E-01 | 1 |
| HEDENFALK_BREAST_CANCER_BRCA1_VS_BRCA2                                              | -0.7257185 | 0.9895833  | 9.58E-01 | 1 |
| GO_MANNOSYLTRANSFERASE_ACTIVITY                                                     | -0.5574479 | 0.989899   | 9.89E-01 | 1 |
| GO_PIGMENT_GRANULE_LOCALIZATION                                                     | -0.4929719 | 0.99006623 | 9.91E-01 | 1 |
| REACTOME_INSULIN_SYNTHESIS_AND_PROCESSING                                           | -0.5122792 | 0.990099   | 9.91E-01 | 1 |
| BIOCARTA_MTOR_PATHWAY                                                               | -0.5157656 | 0.9919028  | 9.92E-01 | 1 |
| GO_ATP_BIOSYNTHETIC_PROCESSES                                                       | -0.5054529 | 0.99245286 | 9.91E-01 | 1 |
| GO_ENHANCER_BINDING                                                                 | -0.694755  | 0.9932432  | 9.63E-01 | 1 |
| GO_REGULATION_OF_RESPIRATORY_GASEOUS_EXCHANGE                                       | -0.4735784 | 0.99352753 | 9.91E-01 | 1 |
| REACTOME_SYNTHESIS_OF_GLYCOSYLPHOSPHATIDYLINOSITOL_GPI                              | -0.4896782 | 0.9938462  | 9.91E-01 | 1 |
| GO_ANTIGEN_PROCESSING_AND_PRESENTATION_OF_EXOGENOUS_PEPTIDE_ANTIGEN_VIA_MHC_CLASS_I | -0.61326   | 0.9942857  | 9.84E-01 | 1 |
| KEGG_N_GLYCAN_BIOSYNTHESIS                                                          | -0.5797238 | 0.9950739  | 9.88E-01 | 1 |
| REACTOME_GLUCOSE_TRANSPORT                                                          | -0.5589915 | 0.9955157  | 9.90E-01 | 1 |
| GO_RIBONUCLEOTIDE_CATABOLIC_PROCESS                                                 | -0.5162023 | 0.99596775 | 9.92E-01 | 1 |
| GO_SAGA_TYPE_COMPLEX                                                                | -0.4444679 | 0.9964158  | 9.91E-01 | 1 |
| BENPORATH_MYC_MAX_TARGETS                                                           | -0.8998002 | 1          | 8.19E-01 | 1 |
| OSMAN_BLADDER_CANCER_UP                                                             | -0.8657439 | 1          | 8.67E-01 | 1 |
| GO_CHROMATIN_MODIFICATION                                                           | -0.8601385 | 1          | 8.73E-01 | 1 |
| GO_MITOCHONDRIAL_ENVELOPE                                                           | -0.848324  | 1          | 8.85E-01 | 1 |
| GO_GLYCOSYL_COMPOUND_METABOLIC_PROCESS                                              | -0.8412582 | 1          | 8.91E-01 | 1 |
| GRADE_COLON_CANCER_UP                                                               | -0.8390588 | 1          | 8.93E-01 | 1 |
| IVANOVA_HEMATOPOIESIS_LATE_PROGENITOR                                               | -0.8347793 | 1          | 8.98E-01 | 1 |
| ACEVEDO_LIVER_TUMOR_VS_NORMAL_ADJACENT_TISSUE_UP                                    | -0.8033887 | 1          | 9.18E-01 | 1 |

|                                                                            |            |   |          |   |
|----------------------------------------------------------------------------|------------|---|----------|---|
| GO_POSTTRANSCRIPTIONAL_REGULATION_OF_GENE_EXPRESSION                       | -0.804615  | 1 | 9.18E-01 | 1 |
| GO_NUCLEOBASE_CONTAINING_COMPOUND_TRANSPORT                                | -0.8025329 | 1 | 9.18E-01 | 1 |
| ROME_INSULIN_TARGETS_IN_MUSCLE_UP                                          | -0.7655283 | 1 | 9.41E-01 | 1 |
| ALONSO_METASTASIS_UP                                                       | -0.7595948 | 1 | 9.43E-01 | 1 |
| GO_NUCLEOPLASM_PART                                                        | -0.7495061 | 1 | 9.47E-01 | 1 |
| GO_REGULATION_OF_PROTEASOMAL_UBIQUITIN_DEPENDENT_PROTEIN_CATABOLIC_PROCESS | -0.7326033 | 1 | 9.56E-01 | 1 |
| GO_TRANSFERASE_COMPLEX                                                     | -0.6935409 | 1 | 9.63E-01 | 1 |
| DAZARD_UV_RESPONSE_CLUSTER_G6                                              | -0.6961657 | 1 | 9.63E-01 | 1 |
| GO_REGULATION_OF_LIGASE_ACTIVITY                                           | -0.6632208 | 1 | 9.73E-01 | 1 |
| PELLICCIOTTA_HDAC_IN_ANTIGEN_PRESENTATION_UP                               | -0.6245539 | 1 | 9.83E-01 | 1 |
| GO_DNA_TEMPLATED_TRANSCRIPTION_INITIATION                                  | -0.6321903 | 1 | 9.83E-01 | 1 |
| GO_S_ADENOSYLMETHIONINE_DEPENDENT_METHYLTRANSFERASE_ACTIVITY               | -0.6162726 | 1 | 9.84E-01 | 1 |
| GO_REGULATION_OF_CYTOKINESIS                                               | -0.5955331 | 1 | 9.86E-01 | 1 |
| REACTOME_ER_PHAGOSOME_PATHWAY                                              | -0.5870922 | 1 | 9.87E-01 | 1 |
| GO_POSITIVE_REGULATION_OF_GENE_EXPRESSION_EPIGENETIC                       | -0.5605612 | 1 | 9.90E-01 | 1 |
| GO_REGULATION_OF_TRANSCRIPTION_FROM_RNA_POLYMERASE_I_PROMOTER              | -0.3727115 | 1 | 9.90E-01 | 1 |
| REACTOME_ACTIVATION_OF_NFKAPPAB_IN_B_CELLS                                 | -0.3881038 | 1 | 9.91E-01 | 1 |
| HALLMARK_DNA_REPAIR                                                        | -0.5368891 | 1 | 9.91E-01 | 1 |
| REACTOME_REGULATION_OF_GENE_EXPRESSION_IN_BETA_CELLS                       | -0.4113057 | 1 | 9.91E-01 | 1 |
| REACTOME_REGULATION_OF_APOPTOSIS                                           | -0.5380183 | 1 | 9.91E-01 | 1 |
| GO_PROTEASOME_COMPLEX                                                      | -0.5216593 | 1 | 9.92E-01 | 1 |
| DIAZ_CHRONIC_MEYLOGENOUS_LEUKEMIA_UP                                       |            |   | 1.00E+00 | 0 |
| KINSEY_TARGETS_OF_EWSR1_FLII_FUSION_UP                                     |            |   | 1.00E+00 | 0 |
| DODD_NASOPHARYNGEAL_CARCINOMA_DN                                           |            |   | 1.00E+00 | 0 |

|                                                     |  |  |          |   |
|-----------------------------------------------------|--|--|----------|---|
| GRAESSMANN_APOPTOSIS_BY_D<br>OXORUBICIN_DN          |  |  | 1.00E+00 | 0 |
| PUJANA_BRCA1_PCC_NETWORK                            |  |  | 1.00E+00 | 0 |
| PUJANA_ATM_PCC_NETWORK                              |  |  | 1.00E+00 | 0 |
| NUYTTEN_EZH2_TARGETS_DN                             |  |  | 1.00E+00 | 0 |
| BLALOCK_ALZHEIMERS_DISEASE<br>DN                    |  |  | 1.00E+00 | 0 |
| KRIGE_RESPONSE_TO_TOSEDOS<br>TAT 6HR_DN             |  |  | 1.00E+00 | 0 |
| DANG_BOUND_BY_MYC                                   |  |  | 1.00E+00 | 0 |
| PILON_KLF1_TARGETS_DN                               |  |  | 1.00E+00 | 0 |
| GO_CELL_CYCLE                                       |  |  | 1.00E+00 | 0 |
| GO_ORGANONITROGEN_COMPO<br>UND BIOSYNTHETIC_PROCESS |  |  | 1.00E+00 | 0 |
| GO_CELL_CYCLE_PROCESS                               |  |  | 1.00E+00 | 0 |
| GO_MITOCHONDRION                                    |  |  | 1.00E+00 | 0 |
| GO_ENVELOPE                                         |  |  | 1.00E+00 | 0 |
| GO_POLY_A_RNA_BINDING                               |  |  | 1.00E+00 | 0 |
| GO_RNA_BINDING                                      |  |  | 1.00E+00 | 0 |
