# Supplementary material for: The LIN28B–IMP1 post-transcriptional regulon has opposing effects on oncogenic signaling in the intestine
Source: PubMed Central journal article supplement — Genes Dev. 2018 Aug 1;32(15-16):1020–34. doi: 10.1101/gad.314369.118 (PMC6075153; doi:10.1101/gad.314369.118), 2018-08-01
Supplement: supp_32.15-16.1020_Supplemental_Table_S7.pdf [file supp_32.15-16.1020_Supplemental_Table_S7.pdf]

Supplementary table 7: Total number and sex distribution of mice used in irradiation and tumor studies

| Genotype                                              | Irradiated (Female/Male) |
|-------------------------------------------------------|--------------------------|
| <i>Imp1<sup>fl/fl</sup></i>                           | 10 (8/4)                 |
| <i>VillinCre; Imp1<sup>fl/fl</sup></i>                | 12 (5/7)                 |
| <i>Imp1<sup>WT</sup></i>                              | 12 (9/5)                 |
| <i>Imp1<sup>ΔHopx</sup></i>                           | 8 (3/5)                  |
| <i>Villin-Lin28b</i>                                  | 5 (4/1)                  |
| <i>VillinCre; Villin-Lin28b; Imp1<sup>fl/fl</sup></i> | 3 (3/0)                  |
| <i>Imp1 OE</i>                                        | 6 (4/2)                  |
| <i>VillinCre; Imp1OE</i>                              | 9 (7/2)                  |

| Genotype                                              | Number of mice for tumor analysis (Female/male) |
|-------------------------------------------------------|-------------------------------------------------|
| Wild Type                                             | 16 (5/11)                                       |
| <i>VillinCre; Imp1<sup>fl/fl</sup></i>                | 9 (5/4)                                         |
| <i>Villin-Lin28b</i>                                  | 21 (10/11)                                      |
| <i>VillinCre; Villin-Lin28b; Imp1<sup>fl/fl</sup></i> | 12 (8/4)                                        |
| <i>VillinCre; Imp1OE</i>                              | 5 (0/5)                                         |
| <i>VillinCre; Villin-Lin28b; Imp1OE</i>               | 4 (3/1)                                         |
